# Supplementary material for: Thio-conjugation of substituted benzofurazans to peptides: molecular sieves catalyze nucleophilic attack on unsaturated fused rings
Source: Royal Society of Chemistry journal article supplement (doi:10.1039/d0cy02004d), 2020-12-10
Supplement: d0cy02004d1.pdf [file d0cy02004d1.pdf]

# **Thio-conjugation of benzofurazan substituents to Peptides: Molecular Sieves catalyze Nucleophilic Attack on Unsaturated fused Rings promoted by Molecular Sieves**

Valentina Verdoliva,<sup>a</sup> Giuseppe Digilio,<sup>b</sup> Michele Saviano,<sup>c</sup> and Stefania De Luca,<sup>\*, a</sup>

<sup>a</sup> Institute of Biostructures and Bioimaging, National Research Council, 80134  
Naples (Italy)

<sup>b</sup> Department of Science and Technologic Innovation Università del Piemonte  
Orientale “A. Avogadro”, 15121 Alessandria (Italy)

<sup>c</sup> Institute of Crystallography, National Research Council, 70126 Bari (Italy)

## **Supporting Information**

### **Table of contents**

### **HPLC, MS and NMR characterization**

## Compound 1a strategy B

### AcCys(a)GlyValAlaNH<sub>2</sub>

A) Structure of benzofurazan/peptide conjugates

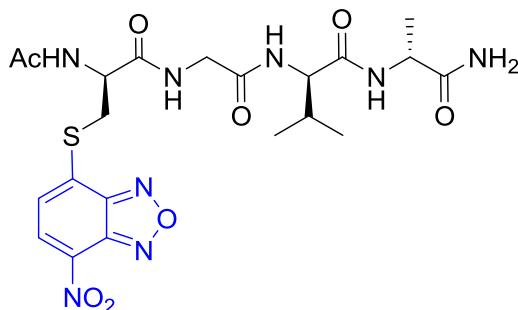

B) preparative HPLC *t*R= 17.844 min; ES-MS: calculated [M + H]<sup>+</sup>, 553.1824, found *m/z* 553.1920 ([M+H]<sup>+</sup>). Yellow solid

HPLC profile of the reaction crude product:

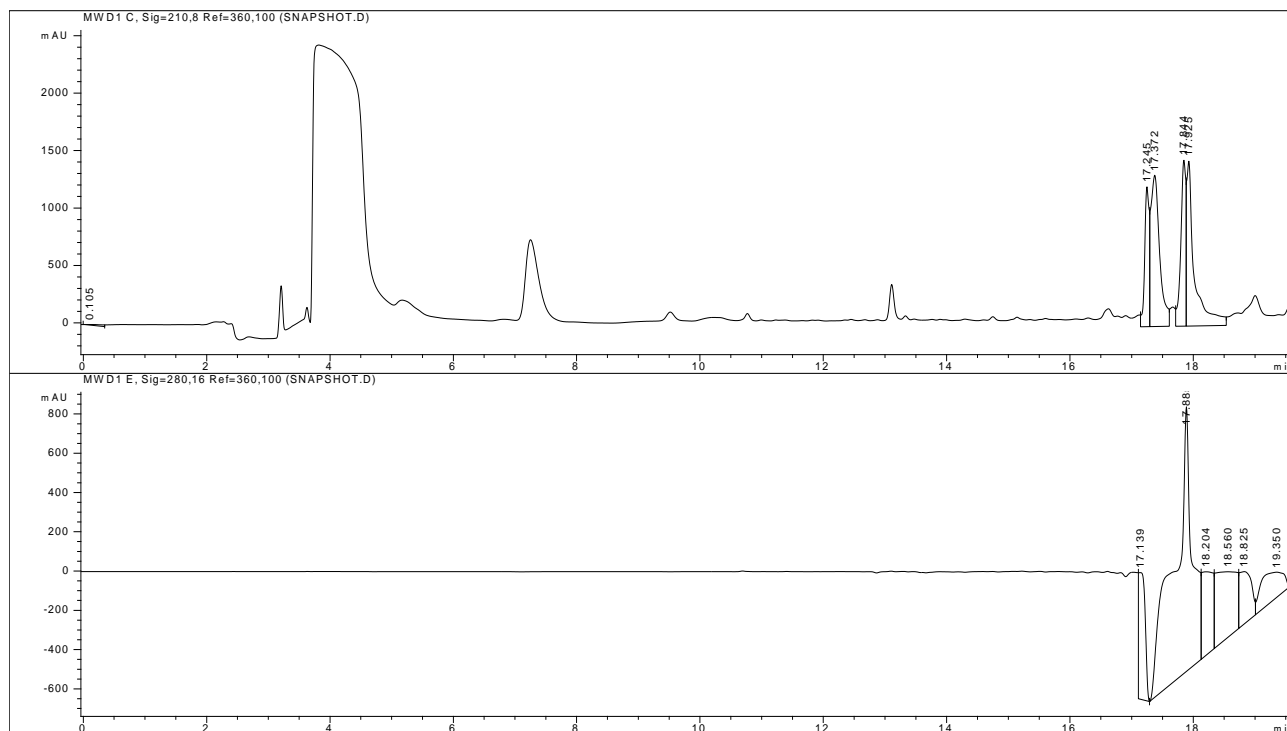

## MS spectrum of **1a** after purification:

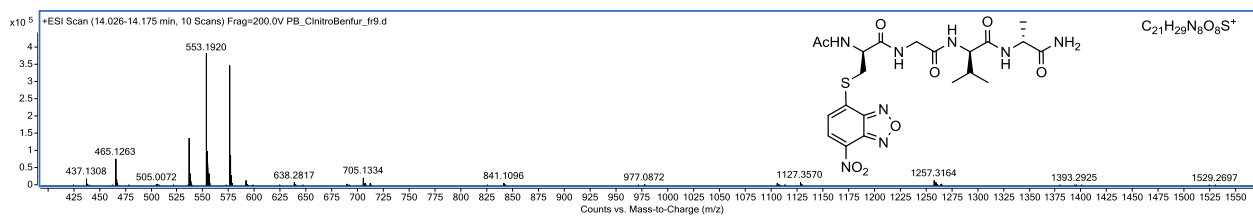

## C) <sup>1</sup>H-NMR (600 MHz, dmsO-d<sub>6</sub>, 298 K)

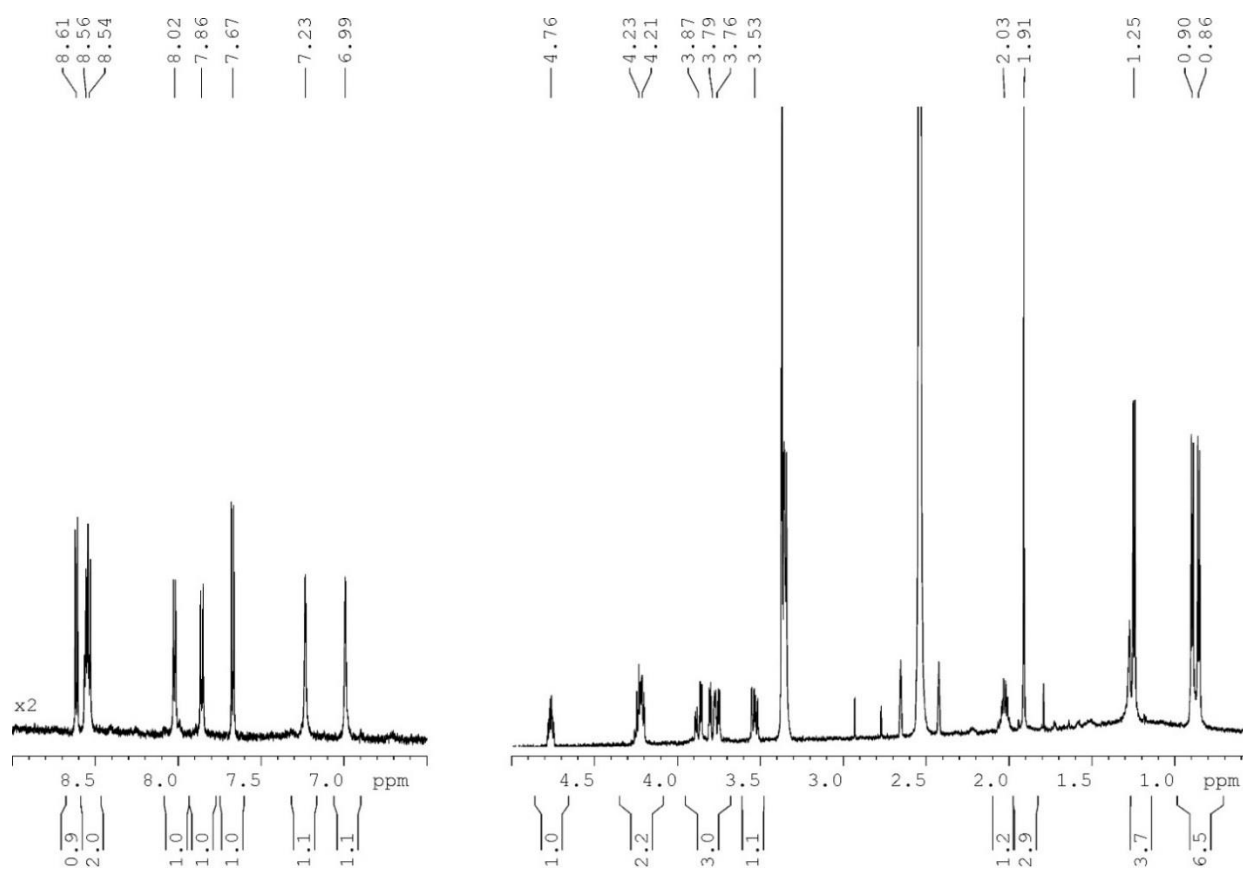

D) Expansions of 2D TOCSY and 2D ROESY NMR (600 MHz, dms<sub>o</sub>-d<sub>6</sub>, 298 K)

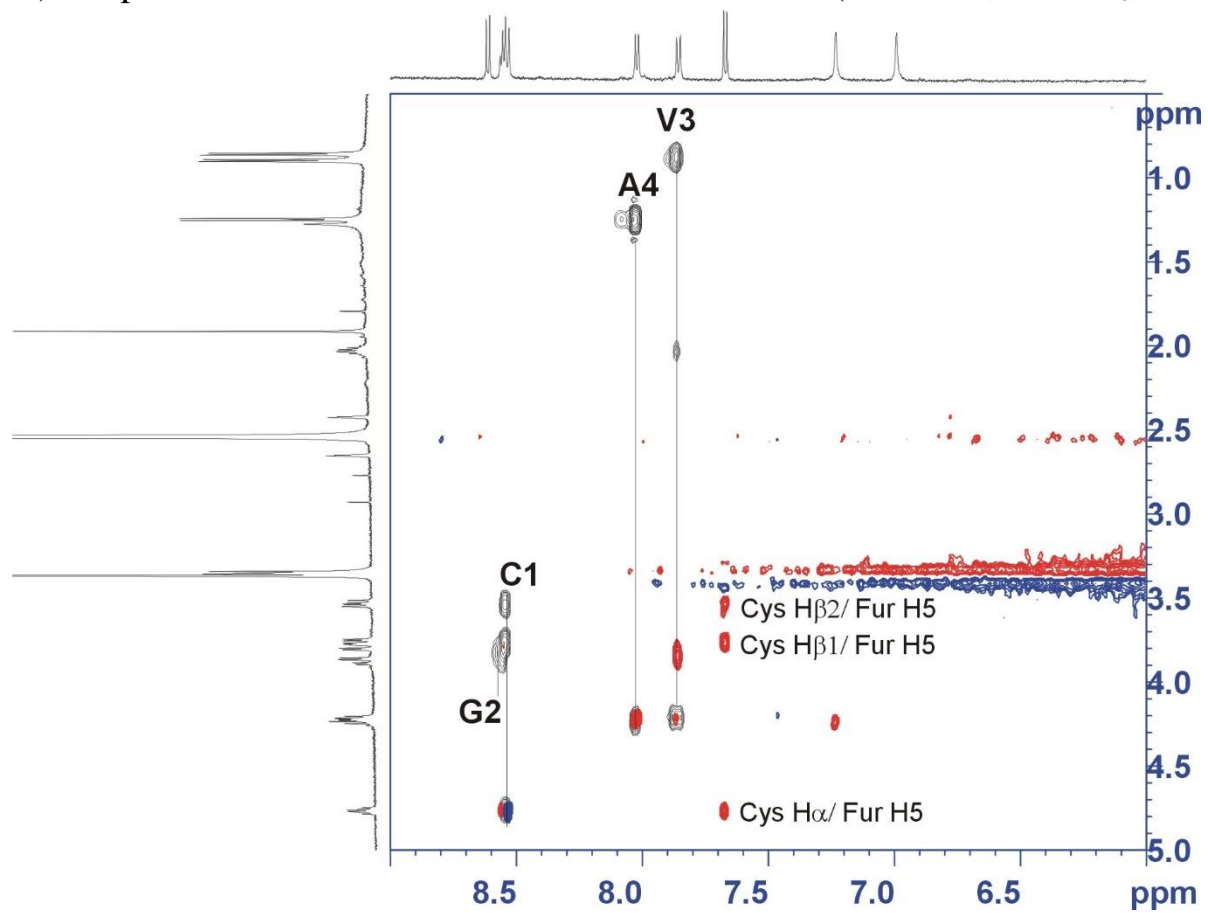

## E) Assignment table

### Compound 1a

| RES       | SPIN ID | SEQ | ppm  |
|-----------|---------|-----|------|
| N-term Ac | CH3     | 1   | 1.91 |
| CYS       | H       | 1   | 8.54 |
| CYS       | HA      | 1   | 4.76 |
| CYS       | HB1     | 1   | 3.76 |
| CYS       | HB2     | 1   | 3.53 |
| FU2       | H5      | 5   | 7.67 |
| FU2       | H6      | 5   | 8.62 |
| GLY       | H       | 2   | 8.56 |
| GLY       | HA2     | 2   | 3.87 |
| GLY       | HA3     | 2   | 3.79 |
| VAL       | H       | 3   | 7.86 |
| VAL       | HA      | 3   | 4.21 |
| VAL       | HB      | 3   | 2.03 |
| VAL       | HG1     | 3   | 0.90 |
| VAL       | HG2     | 3   | 0.86 |
| ALA       | H       | 4   | 8.02 |
| ALA       | HA      | 4   | 4.23 |
| ALA       | HB      | 4   | 1.25 |
| CO-NH2    | NH1     | 4   | 7.23 |
| CO-NH2    | NH2     | 4   | 6.99 |

## Compound 1b (X: Cl) strategy B

### AcCys(b)GlyValAlaNH<sub>2</sub>

#### A) Structure of benzofurazan/peptide conjugates

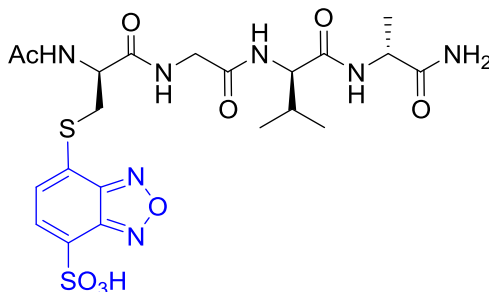

- B) preparative HPLC *t*R= 12.728 min (close to the rt of the substrate employed b-Cl); ES-MS: calculated [M + H]<sup>+</sup>, 588.1541, found *m/z* 588.1545 ([M+H]<sup>+</sup>).  
Yellow solid

HPLC profile of the reaction crude product:

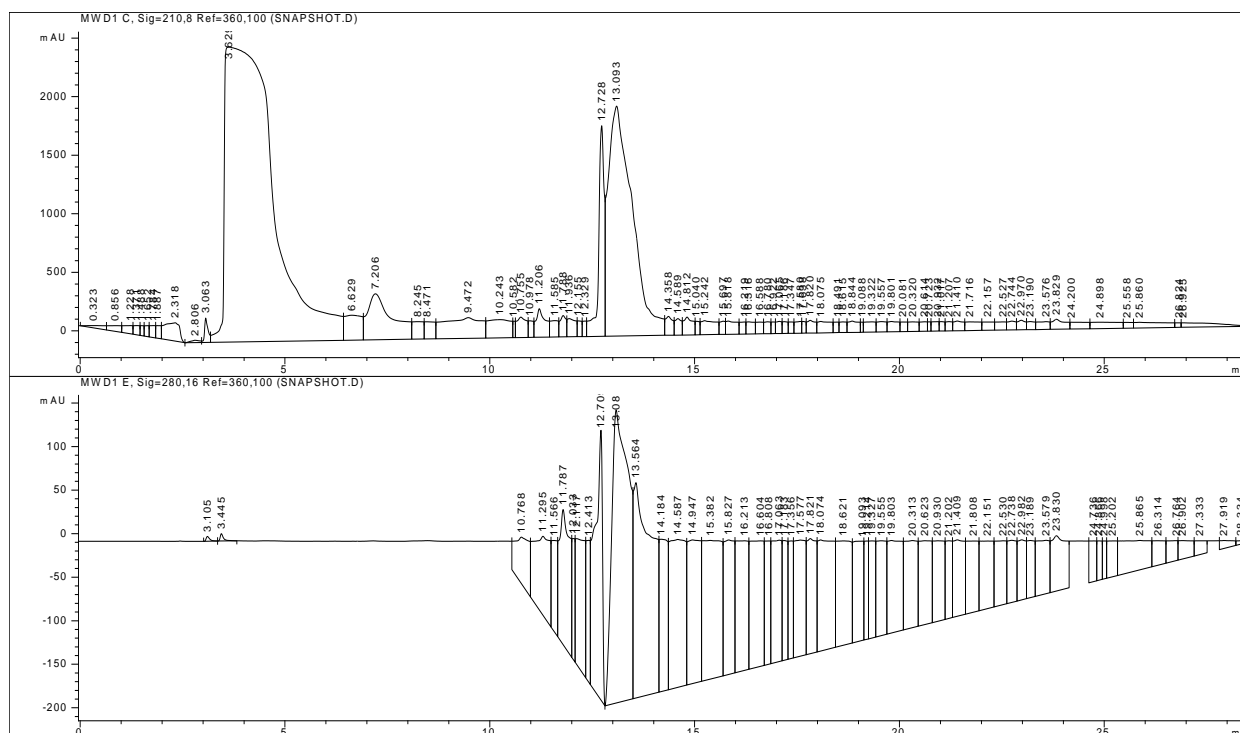

## MS spectrum of **1b** after purification:

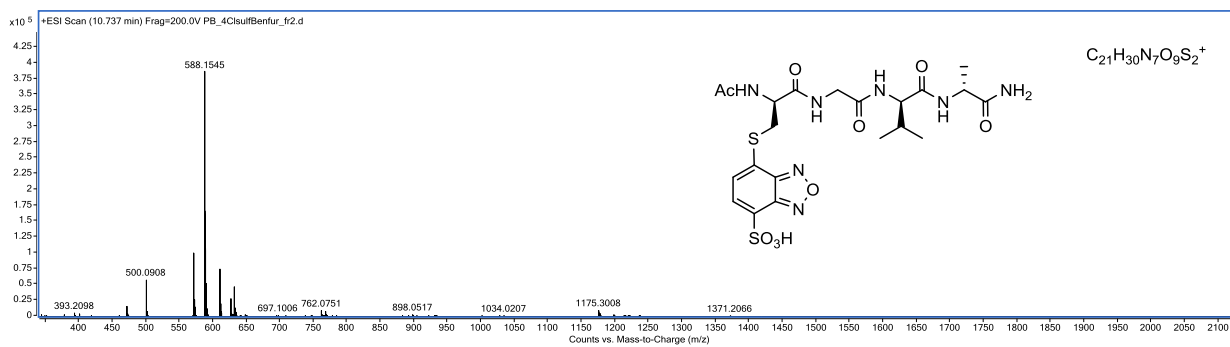

## C) $^1H$ -NMR (600 MHz, dms $o$ - $d_6$ , 298 K)

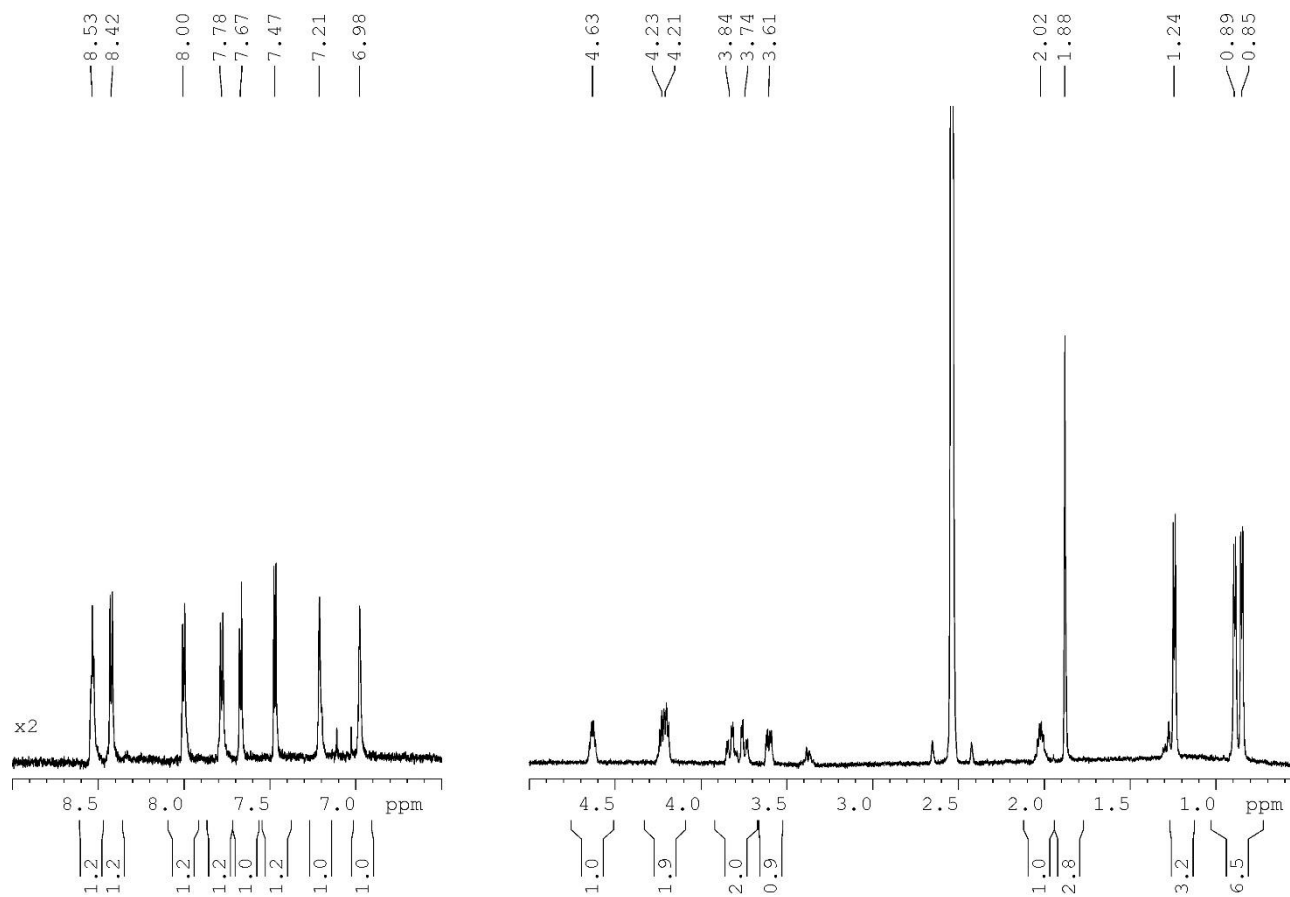

F) Fluorescence spectrum ( $\lambda_{ex} = 380 \text{ nm}$ )

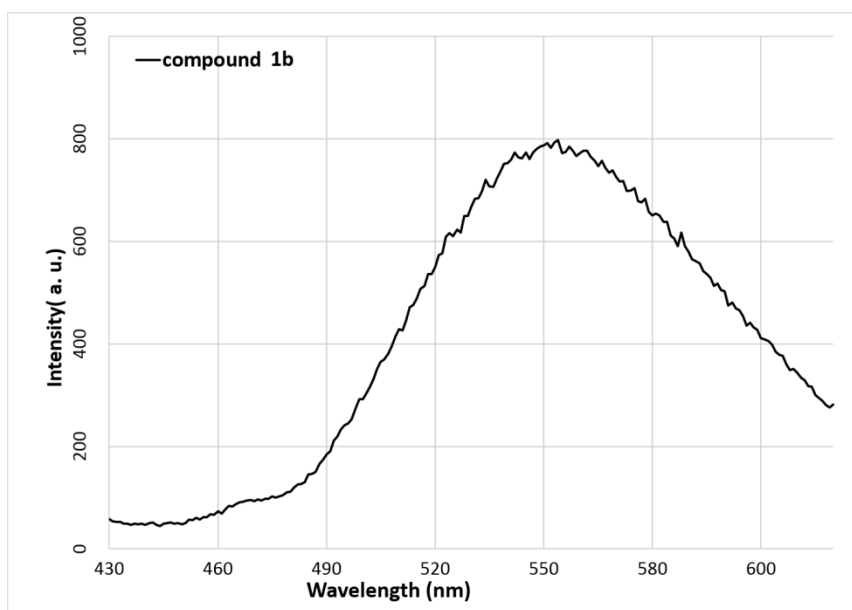



## Compound 1b (X: F) strategy B

AcCys(b)GlyValAlaNH<sub>2</sub>

### A) Structure of benzofurazan/peptide conjugates

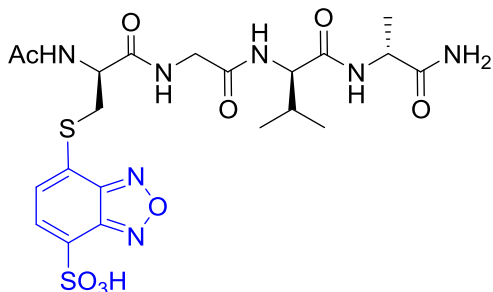

B) preparative HPLC  $t_R = 13.043$  min (co-eluted with the substrate employed b-F);  
ES-MS: calculated  $[M + H]^+$ , 588.1541, found  $m/z$  588.1514 ( $[M+H]^+$ ). Yellow solid

HPLC profile of the reaction crude product:

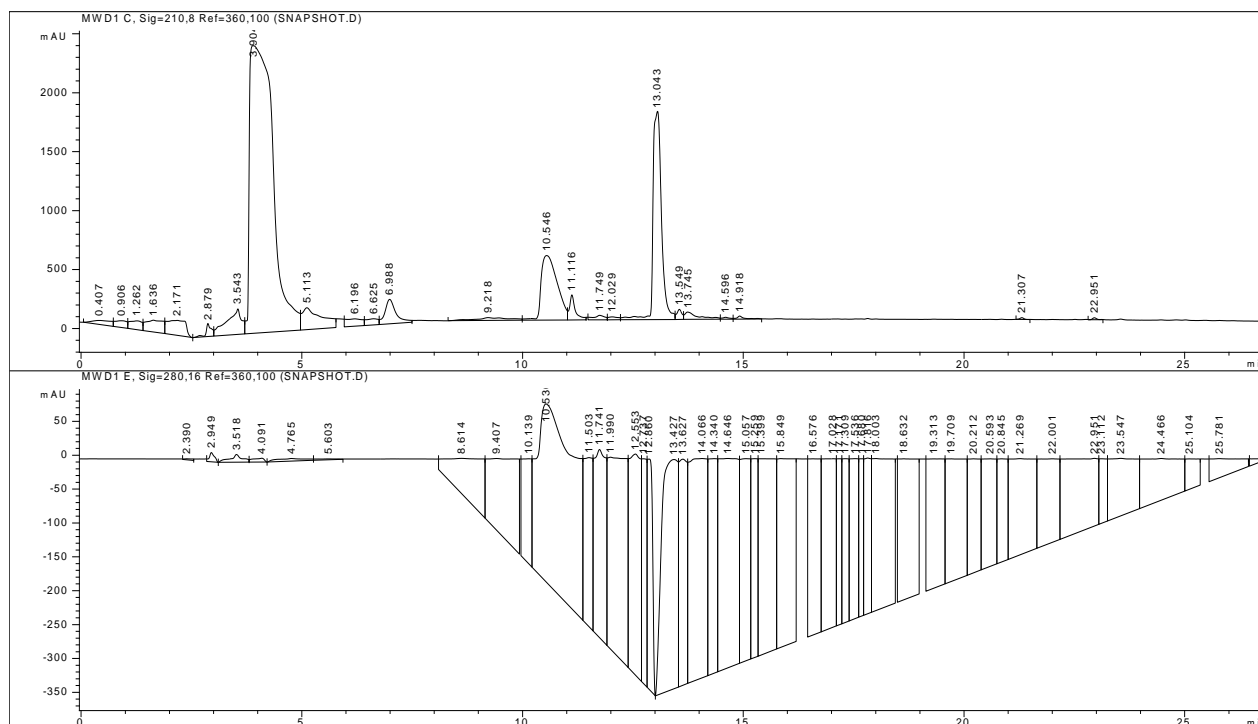

MS spectrum of **1b** after purification:

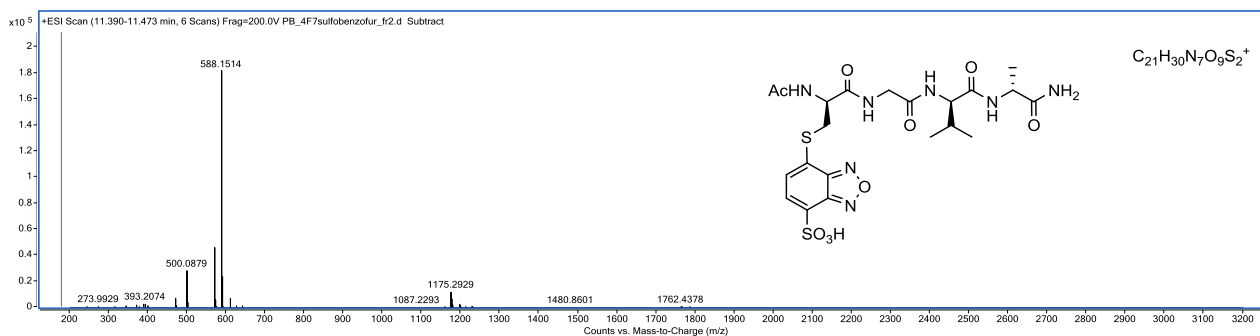

C)  $^1H$ -NMR (600 MHz, dms $o$ - $d_6$ , 298 K)

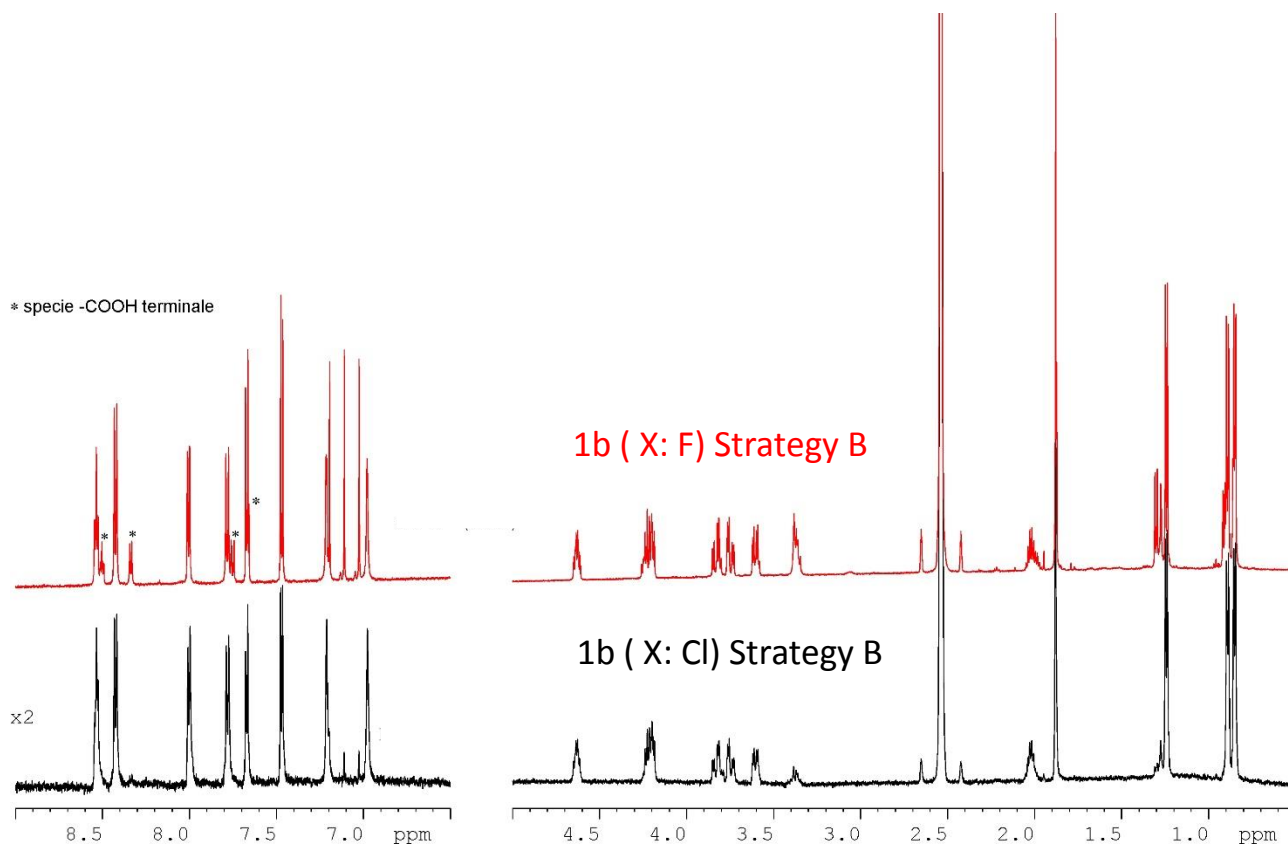

$^1H$ -NMR spectra of **1b** obtained from the fluorine precursor (top) and the chlorine precursor (bottom). Asterisks denote an impurity due to transformation of the C-terminus  $-CONH_2$  group into  $-COOH$ .

D) Expansions of 2D TOCSY and 2D ROESY NMR (600 MHz, dms<sub>o</sub>-d<sub>6</sub>, 298 K)

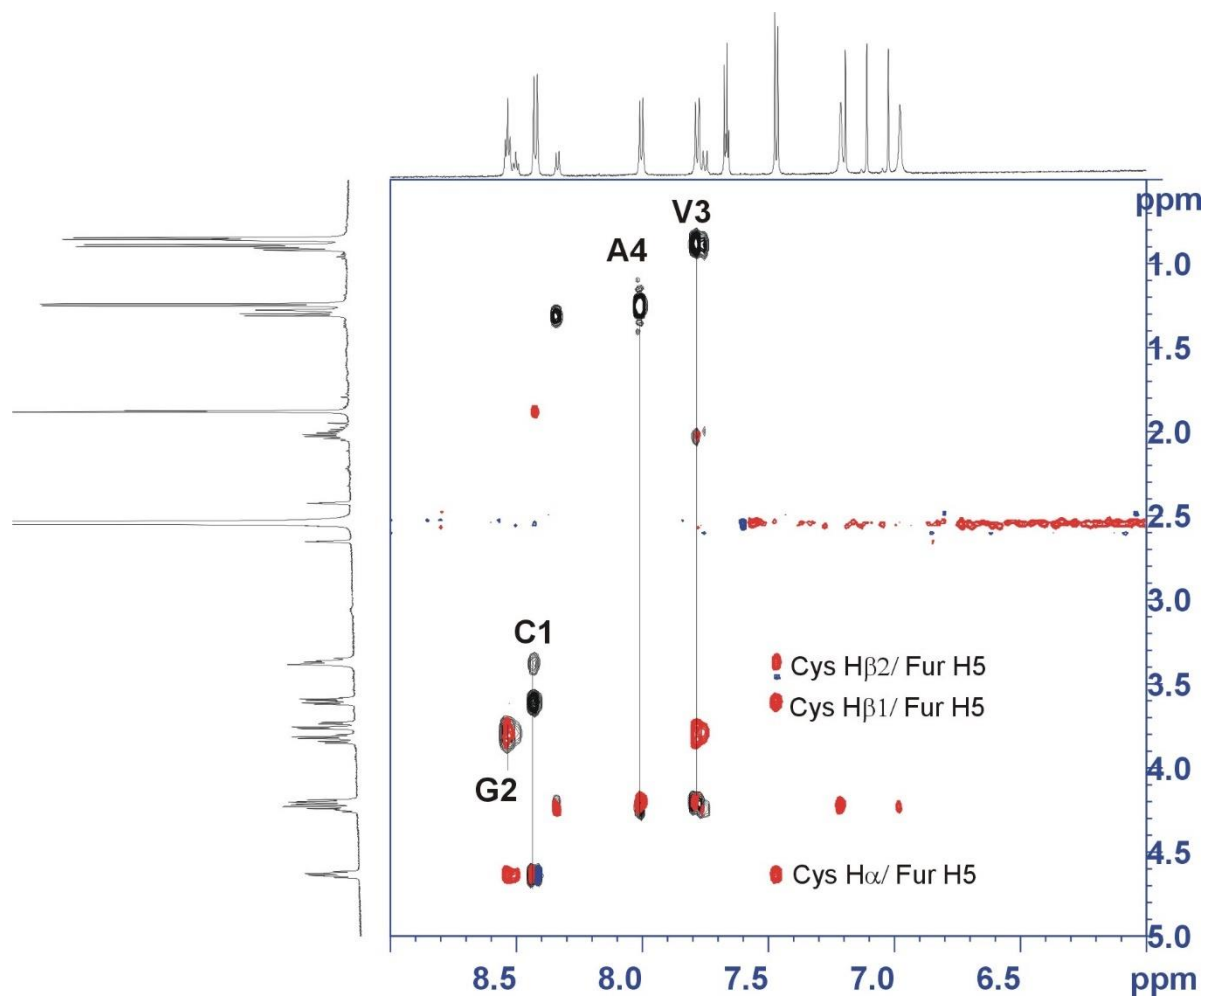

## E) Assignment table

### Compound 1b

| RES       | SPIN ID | SEQ | ppm  |
|-----------|---------|-----|------|
| N-term Ac | CH3     | 1   | 1.88 |
| CYS       | H       | 1   | 8.42 |
| CYS       | HA      | 1   | 4.63 |
| CYS       | HB1     | 1   | 3.61 |
| CYS       | HB2     | 1   | 3.38 |
| FU2       | H5      | 5   | 7.47 |
| FU2       | H6      | 5   | 7.67 |
| GLY       | H       | 2   | 8.53 |
| GLY       | HA2     | 2   | 3.83 |
| GLY       | HA3     | 2   | 3.74 |
| VAL       | H       | 3   | 7.78 |
| VAL       | HA      | 3   | 4.21 |
| VAL       | HB      | 3   | 2.02 |
| VAL       | HG1     | 3   | 0.89 |
| VAL       | HG2     | 3   | 0.85 |
| ALA       | H       | 4   | 8.00 |
| ALA       | HA      | 4   | 4.23 |
| ALA       | HB      | 4   | 1.24 |
| CO-NH2    | NH1     | 4   | 7.21 |
| CO-NH2    | NH2     | 4   | 6.98 |

## Compound 1c (X: F) strategy B

AcCys(c)GlyValAlaNH<sub>2</sub>

A) Structure of benzofurazan/peptide conjugates

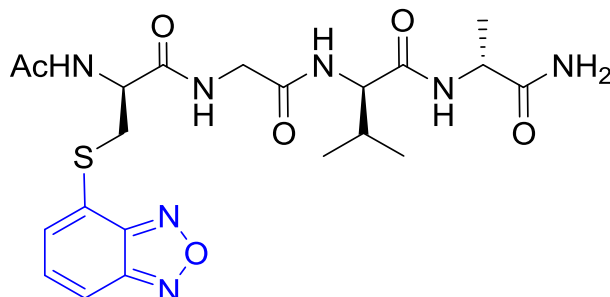

B) preparative HPLC *t*R= 17.068 min; ES-MS: calculated [M + H]<sup>+</sup>, 508.1973, found *m/z* 508.1949 ([M+H]<sup>+</sup>). White solid

HPLC profile of the reaction crude product:

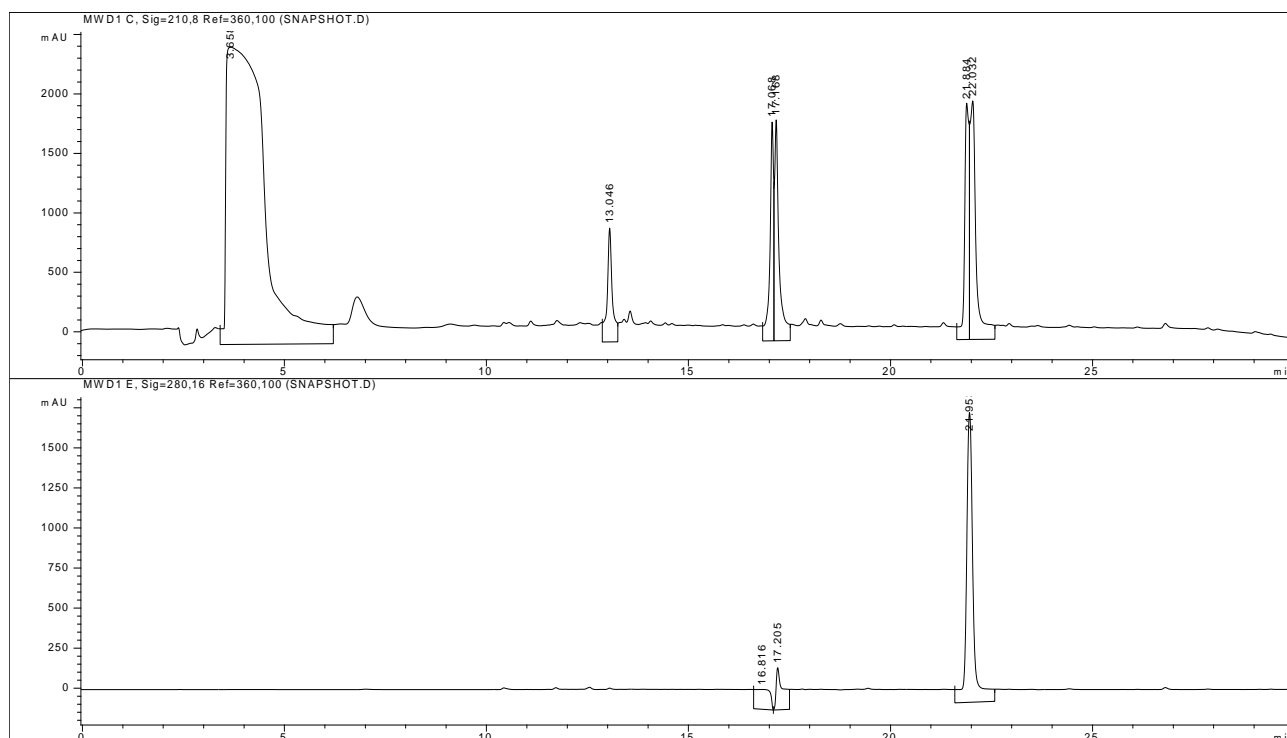

MS spectrum of **1c** after purification:

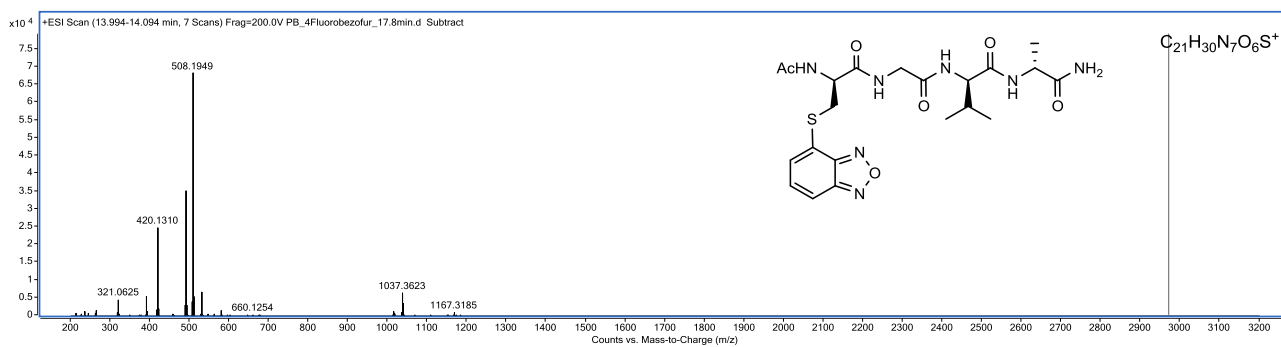

C) <sup>1</sup>H-NMR (600 MHz, dms<sub>o</sub>-d<sub>6</sub>, 298 K)

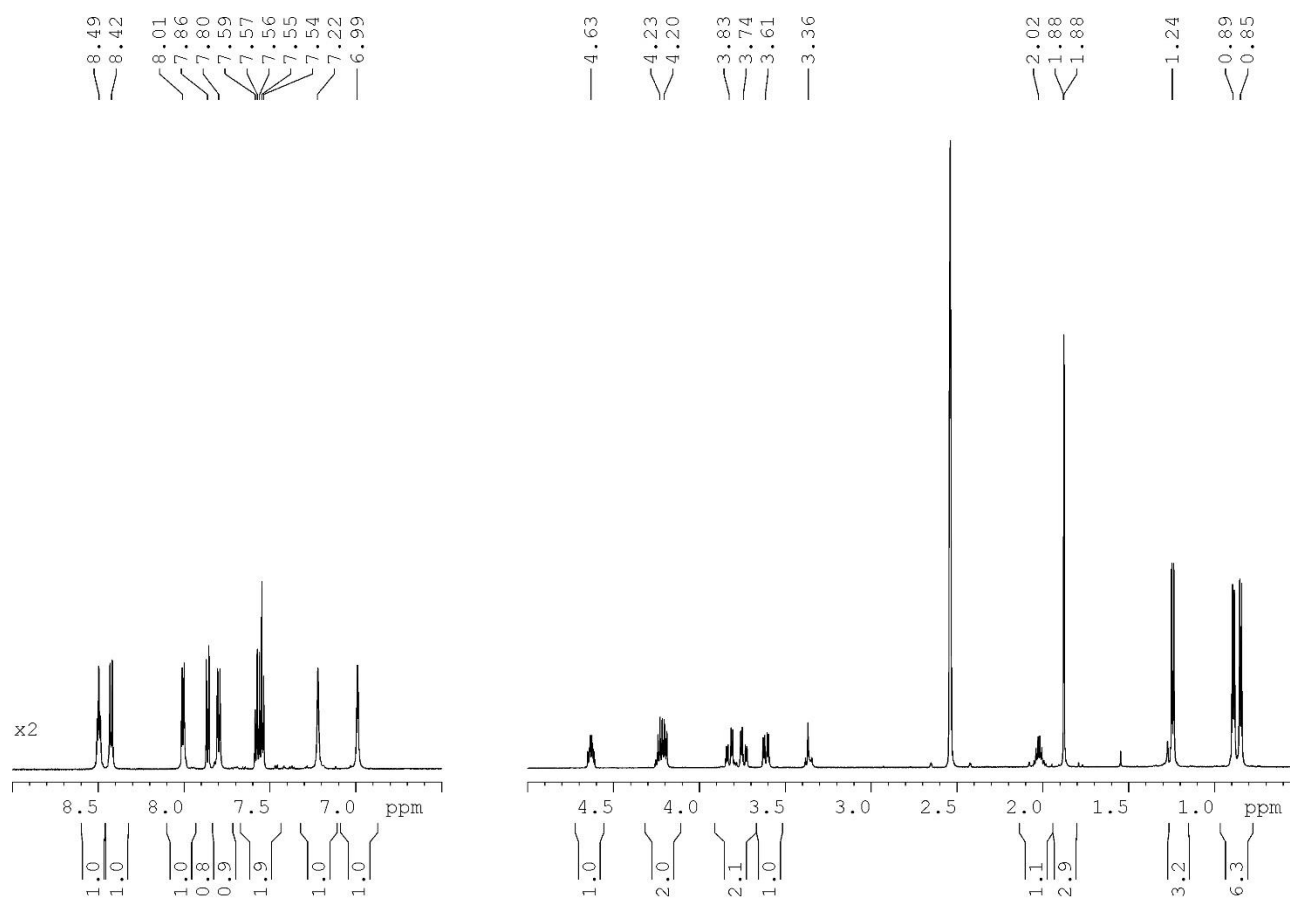

D) Expansions of 2D TOCSY and 2D ROESY NMR (600 MHz, dms<sub>o</sub>-d<sub>6</sub>, 298 K)

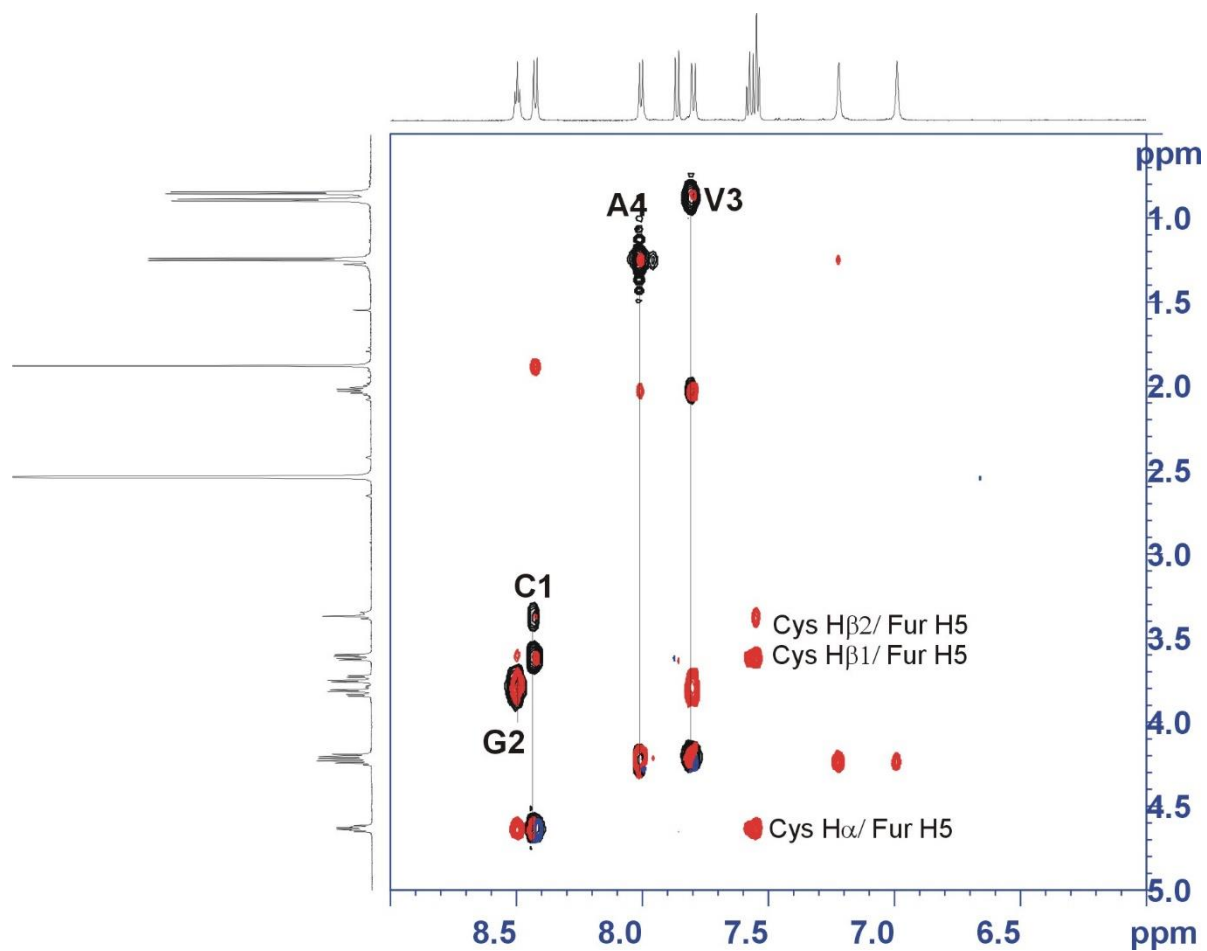

## E) Assignment table

### Compound 1c

| RES       | SPIN ID | SEQ | ppm  |
|-----------|---------|-----|------|
| N-term Ac | CH3     | 1   | 1.88 |
| CYS       | H       | 1   | 8.43 |
| CYS       | HA      | 1   | 4.63 |
| CYS       | HB1     | 1   | 3.61 |
| CYS       | HB2     | 1   | 3.36 |
| FU2       | H5      | 5   | 7.55 |
| FU2       | H6      | 5   | 7.58 |
| FU2       | H7      | 5   | 7.87 |
| GLY       | H       | 2   | 8.49 |
| GLY       | HA2     | 2   | 3.83 |
| GLY       | HA3     | 2   | 3.74 |
| VAL       | H       | 3   | 7.80 |
| VAL       | HA      | 3   | 4.20 |
| VAL       | HB      | 3   | 2.03 |
| VAL       | HG1     | 3   | 0.89 |
| VAL       | HG2     | 3   | 0.85 |
| ALA       | H       | 4   | 8.01 |
| ALA       | HA      | 4   | 4.23 |
| ALA       | HB      | 4   | 1.24 |
| CO-NH2    | NH1     | 4   | 7.22 |
| CO-NH2    | NH2     | 4   | 6.99 |



G) Overlay of the  $^1\text{H}$ ,  $^{13}\text{C}$  HSQC (red) and  $^1\text{H}$ ,  $^{13}\text{C}$  HMBC (black) NMR spectra (600 MHz, DMSO- $d_6$ , 298 K)

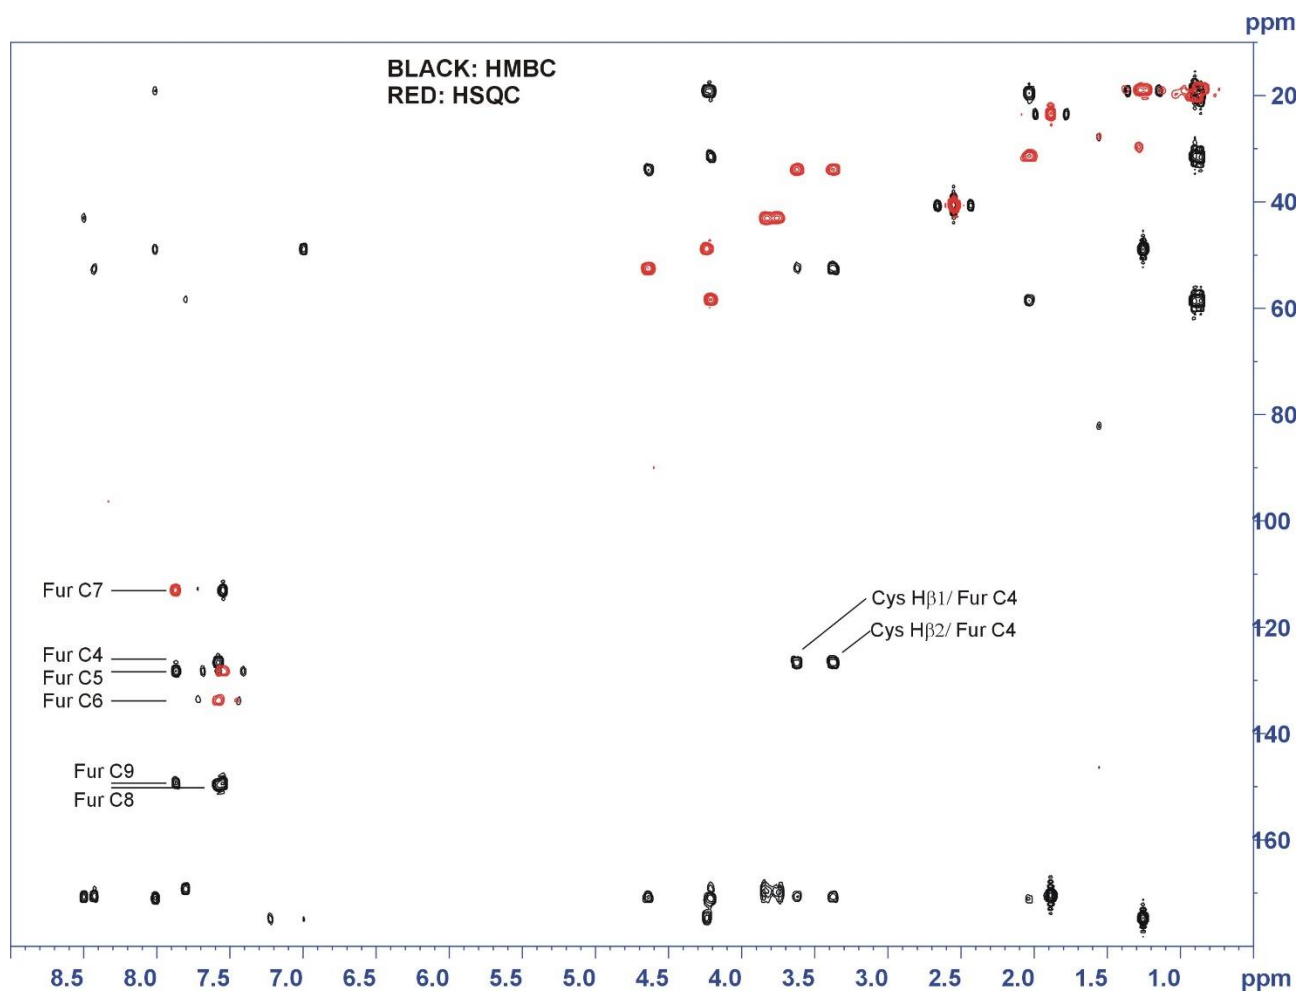

H)  $^{13}\text{C}$  NMR assignment table (from  $^1\text{H}$ ,  $^{13}\text{C}$  HSQC and  $^1\text{H}$ ,  $^{13}\text{C}$  HMBC)

**Compound 1c**

| RES       | SPIN ID | SEQ | ppm   |
|-----------|---------|-----|-------|
| N-term Ac | CH3     | 1   | 23.3  |
| N-term Ac | C       | 1   | 170.5 |
| CYS       | CA      | 1   | 52.3  |
| CYS       | CB      | 1   | 33.8  |
| CYS       | C       | 1   | 170.7 |
| FUR       | C5      | 5   | 128.3 |
| FUR       | C6      | 5   | 133.7 |
| FUR       | C7      | 5   | 112.8 |
| FUR       | C8      | 5   | 149.7 |
| FUR       | C9      | 5   | 149.3 |
| FUR       | C4      | 5   | 126.7 |
| GLY       | CA      | 2   | 43.0  |
| GLY       | C       | 2   | 169.3 |
| VAL       | CA      | 3   | 58.4  |
| VAL       | CB      | 3   | 31.2  |
| VAL       | CG1     | 3   | 19.8  |
| VAL       | CG2     | 3   | 18.6  |
| VAL       | C       | 3   | 171.0 |
| ALA       | CA      | 4   | 48.8  |
| ALA       | CB      | 4   | 18.8  |
| C-term    | CO-NH2  | 4   | 174.8 |

## Compound 1c (X: Cl) strategy B

AcCys(c)GlyValAlaNH<sub>2</sub>

A) Structure of benzofurazan/peptide conjugates



B) preparative HPLC *t*R= 17.123 min; ES-MS: calculated [M + H]<sup>+</sup>, 508.1973, found *m/z* 508.1949 ([M+H]<sup>+</sup>). White solid

HPLC profile of the reaction crude product:

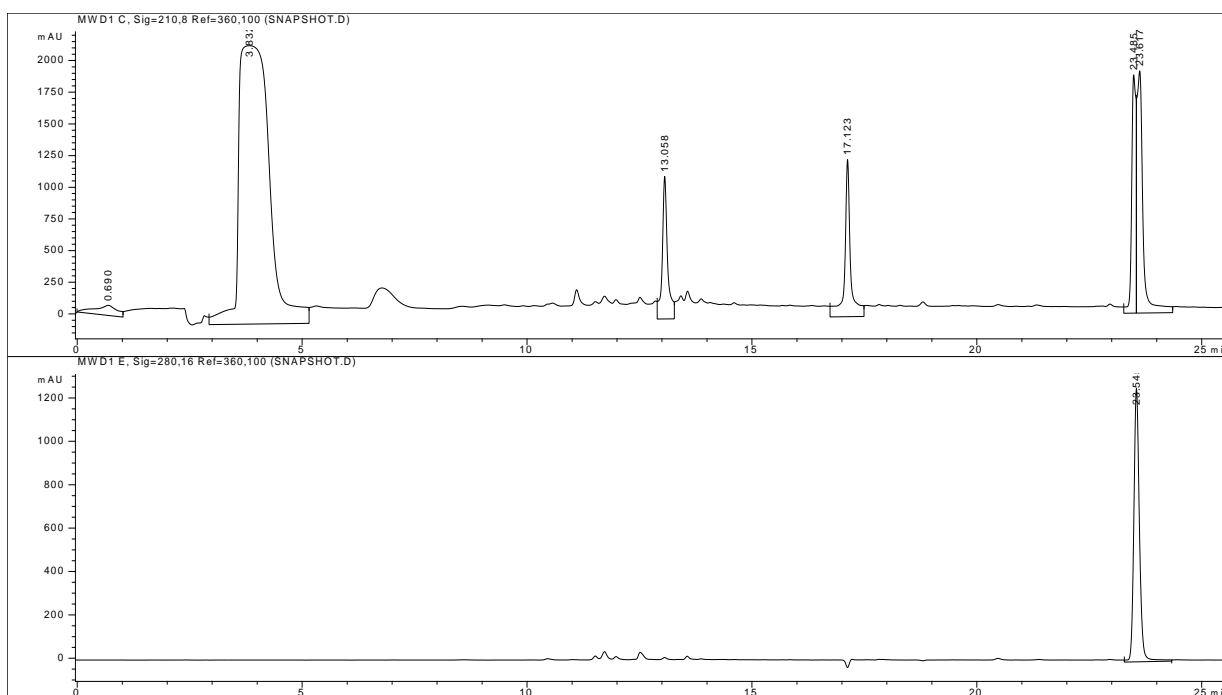

## MS spectrum of **1c** after purification:

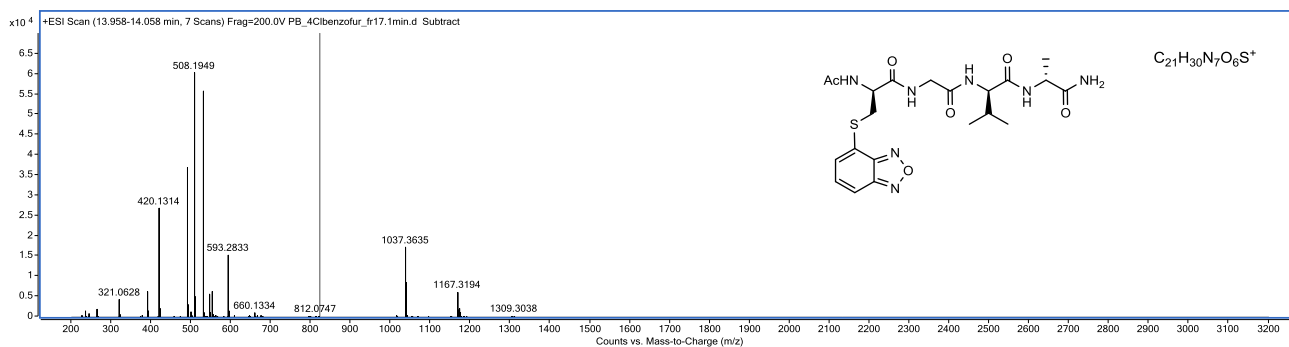

## C) <sup>1</sup>H-NMR (600 MHz, dms<sub>o</sub>-d<sub>6</sub>, 298 K)

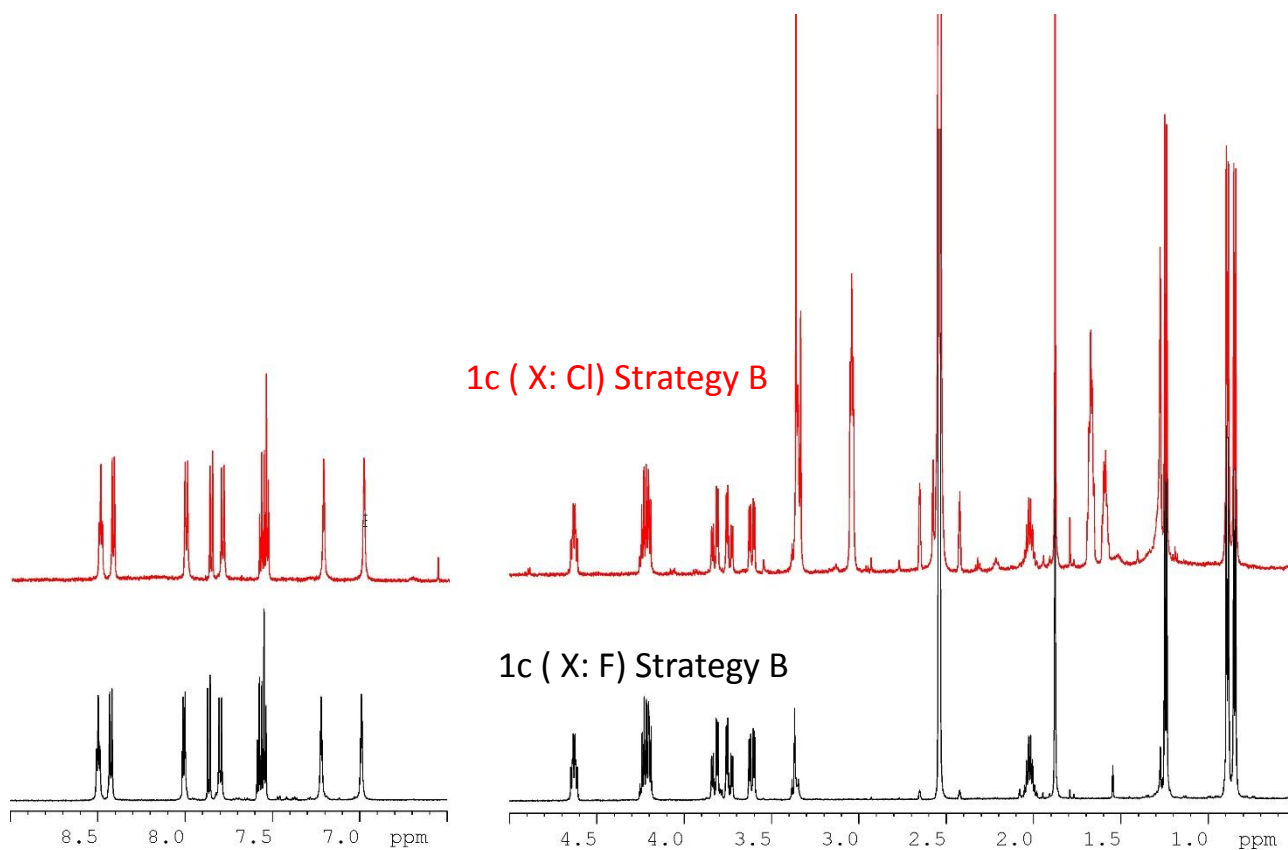

<sup>1</sup>H-NMR spectra of **1c** obtained from the fluorine precursor (bottom) and the chlorine precursor (top).

## Compound 1d (X: Br) strategy B

AcCys(d)GlyValAlaNH<sub>2</sub>

A) Structure of benzofurazan/peptide conjugates

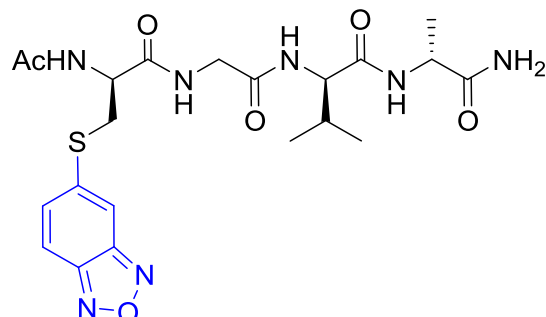

B) preparative HPLC *t*R= 17.181 min; ES-MS: calculated [M + H]<sup>+</sup>, 508.1973, found *m/z* 508.1955 ([M+H]<sup>+</sup>). White solid

HPLC profile of the reaction crude product:

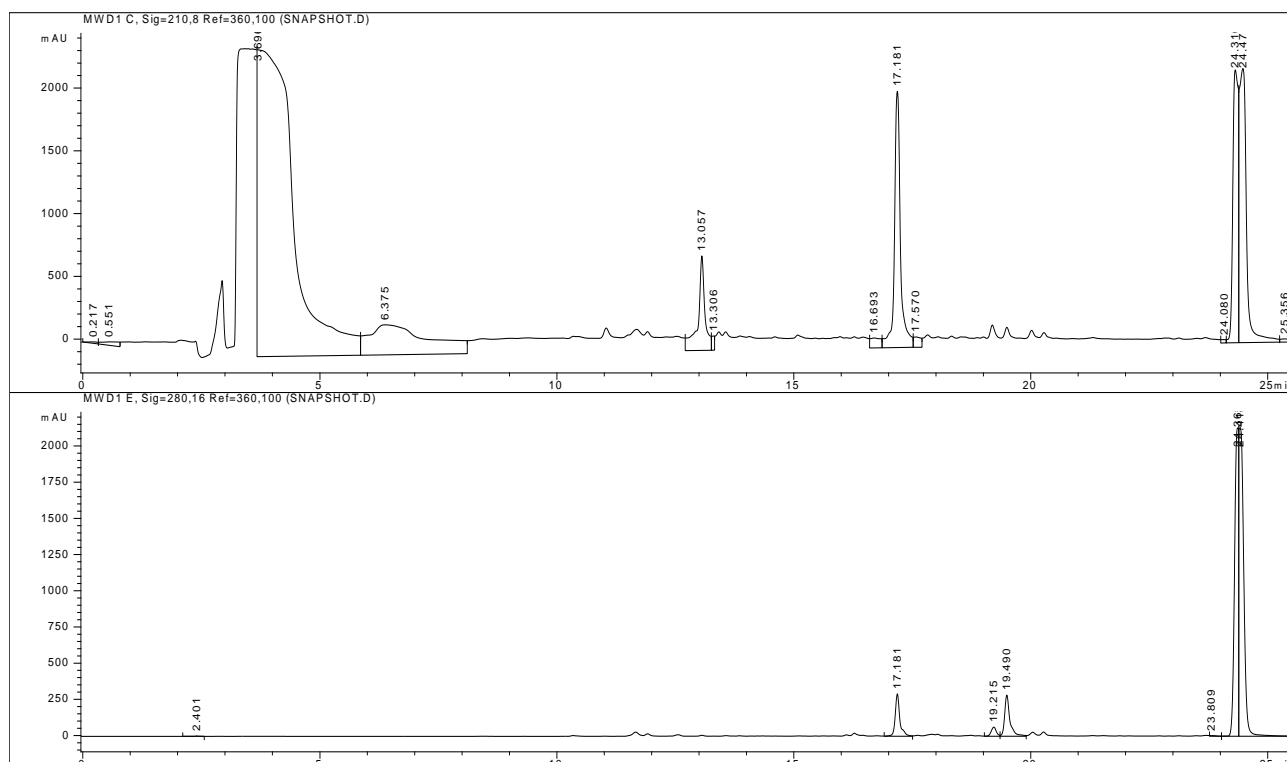

MS spectrum of **1d** after purification:

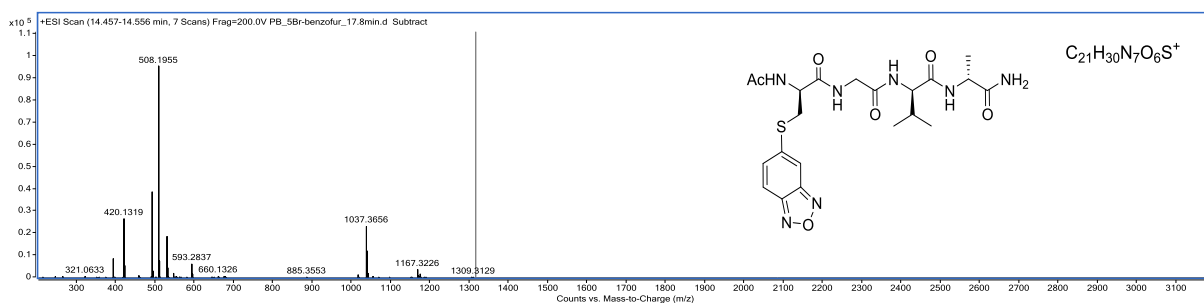

C) <sup>1</sup>H-NMR (600 MHz, DMSO-d<sub>6</sub>, 298 K)

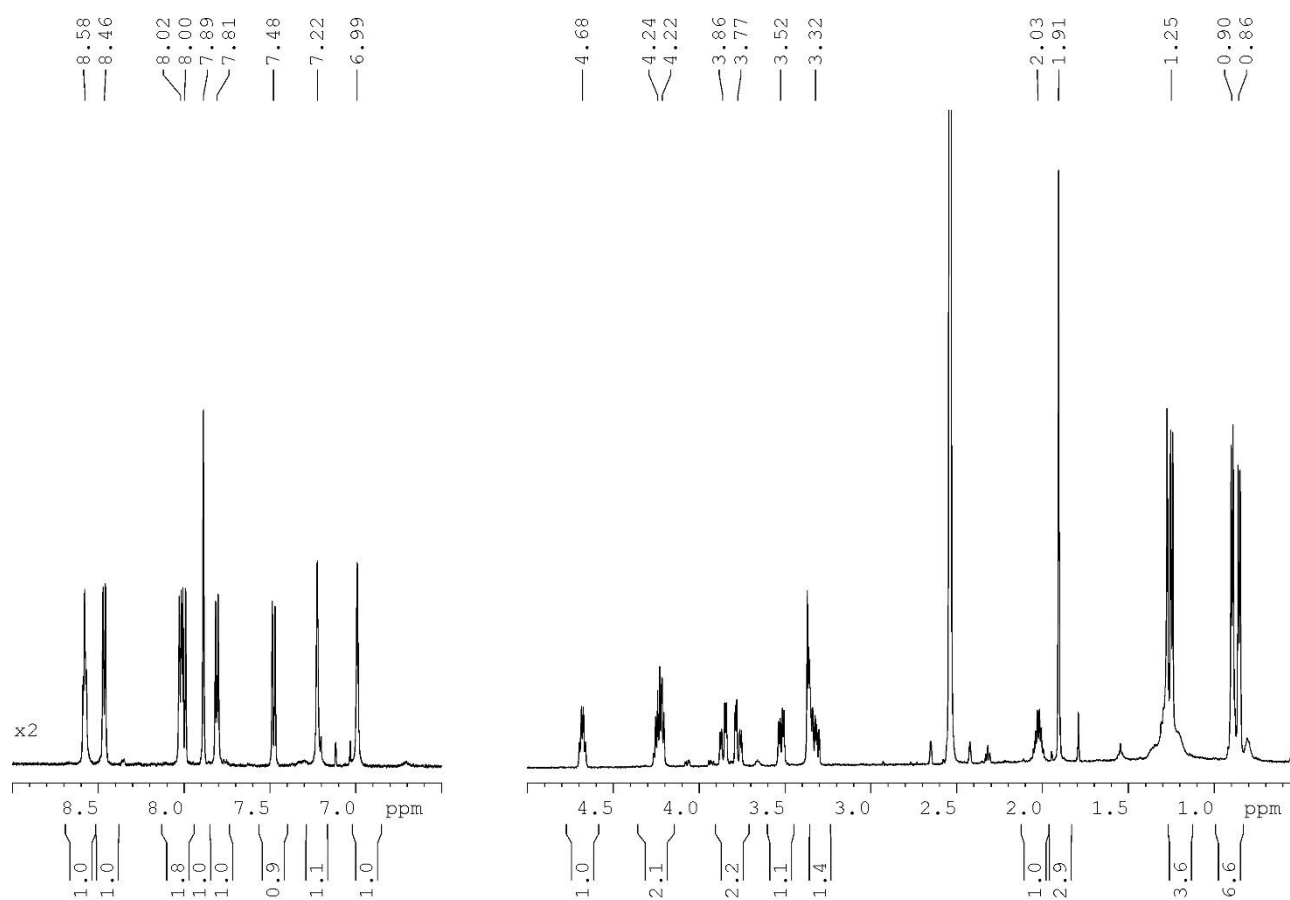

D) Expansions of 2D TOCSY and 2D ROESY NMR (600 MHz, DMSO-d<sub>6</sub>, 298 K)

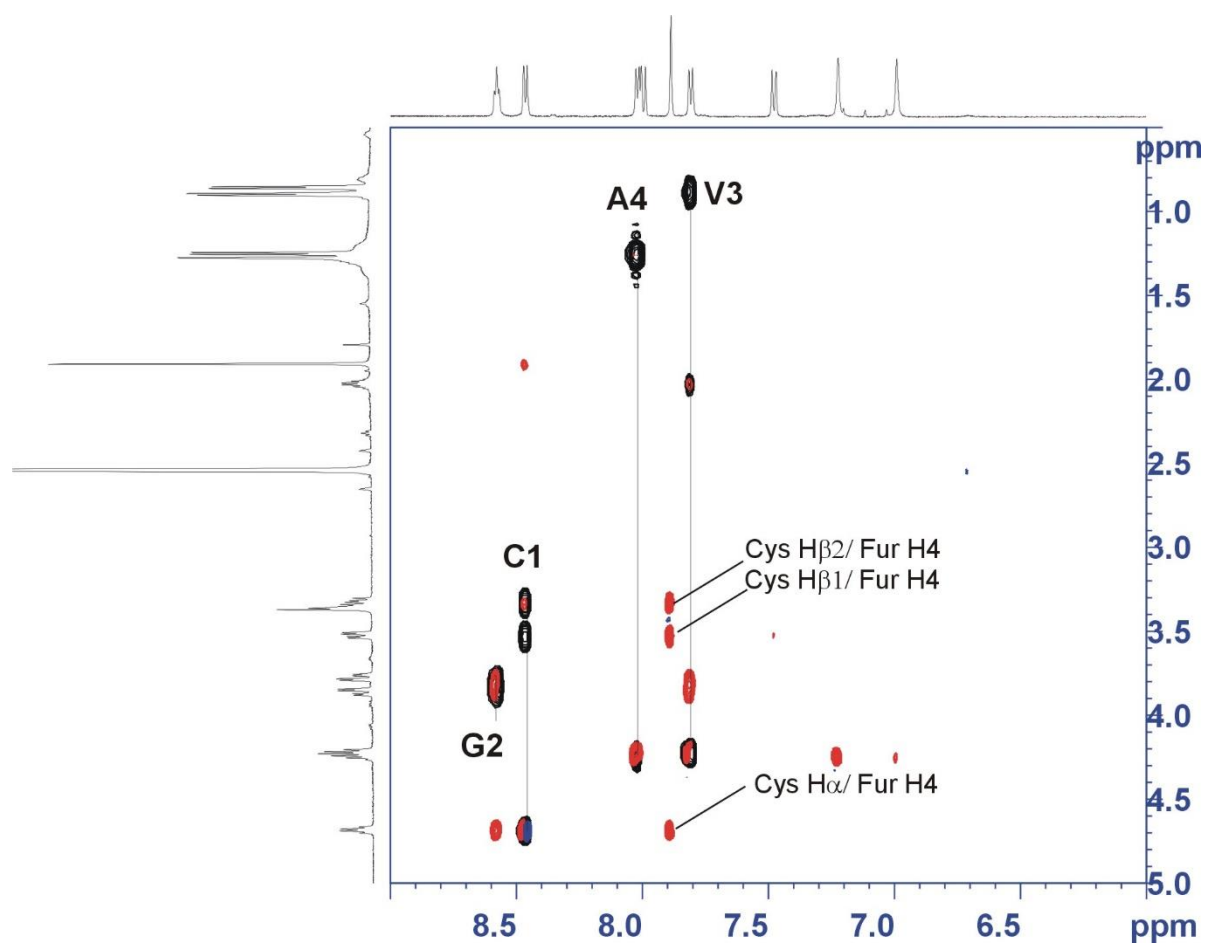

## E) $^1\text{H}$ NMR assignment table

### Compound 1d

| RES       | SPIN ID | SEQ | ppm  |
|-----------|---------|-----|------|
| N-term Ac | CH3     | 1   | 1.91 |
| CYS       | H       | 1   | 8.46 |
| CYS       | HA      | 1   | 4.68 |
| CYS       | HB1     | 1   | 3.52 |
| CYS       | HB2     | 1   | 3.33 |
| FUR       | H6      | 5   | 7.48 |
| FUR       | H7      | 5   | 8.00 |
| FUR       | H4      | 5   | 7.89 |
| GLY       | H       | 2   | 8.57 |
| GLY       | HA2     | 2   | 3.86 |
| GLY       | HA3     | 2   | 3.77 |
| VAL       | H       | 3   | 7.81 |
| VAL       | HA      | 3   | 4.22 |
| VAL       | HB      | 3   | 2.03 |
| VAL       | HG1     | 3   | 0.90 |
| VAL       | HG2     | 3   | 0.86 |
| ALA       | H       | 4   | 8.02 |
| ALA       | HA      | 4   | 4.24 |
| ALA       | HB      | 4   | 1.25 |
| CO-NH2    | NH1     | 4   | 7.22 |
| CO-NH2    | NH2     | 4   | 6.99 |



G) Overlay of the  $^1\text{H}$ ,  $^{13}\text{C}$  HSQC (black) and  $^1\text{H}$ ,  $^{13}\text{C}$  HMBC (red) NMR spectra (600 MHz, DMSO- $d_6$ , 298 K)

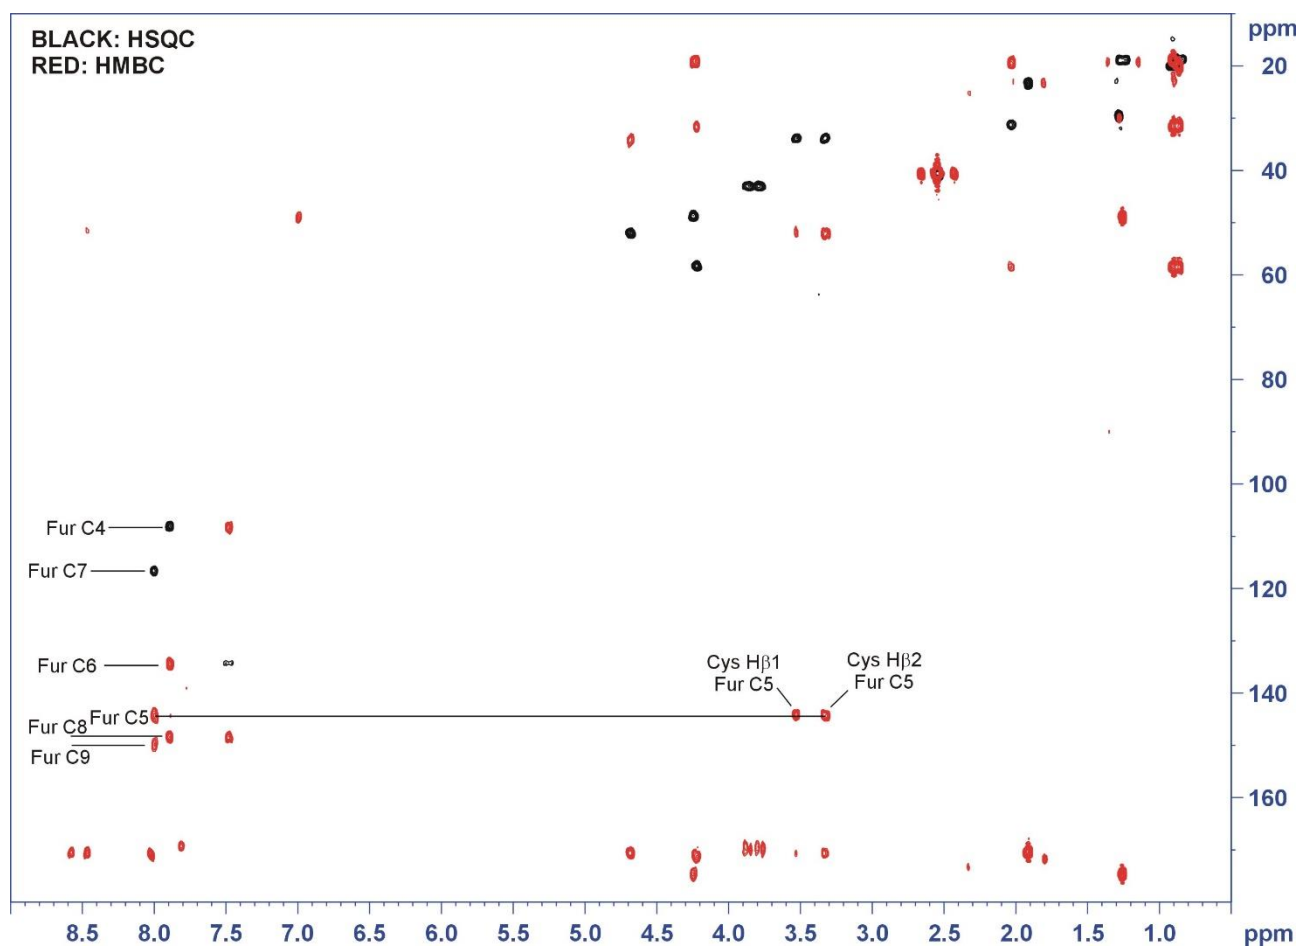

H)  $^{13}\text{C}$  NMR assignment table (from  $^1\text{H}$ ,  $^{13}\text{C}$  HSQC and  $^1\text{H}$ ,  $^{13}\text{C}$  HMBC)

**Compound 1d**

| RES       | SPIN ID | SEQ | ppm   |
|-----------|---------|-----|-------|
| N-term Ac | CH3     | 1   | 23.3  |
| N-term Ac | C       | 1   | 170.4 |
| CYS       | CA      | 1   | 52.0  |
| CYS       | CB      | 1   | 33.8  |
| CYS       | C       | 1   | 170.6 |
| FUR       | C5      | 5   | 144.3 |
| FUR       | C6      | 5   | 134.1 |
| FUR       | C7      | 5   | 116.6 |
| FUR       | C8      | 5   | 148.4 |
| FUR       | C9      | 5   | 149.7 |
| FUR       | C4      | 5   | 107.9 |
| GLY       | CA      | 2   | 42.9  |
| GLY       | C       | 2   | 169.3 |
| VAL       | CA      | 3   | 58.3  |
| VAL       | CB      | 3   | 31.1  |
| VAL       | CG1     | 3   | 19.8  |
| VAL       | CG2     | 3   | 18.7  |
| VAL       | C       | 3   | 171.0 |
| ALA       | CA      | 4   | 48.6  |
| ALA       | CB      | 4   | 18.8  |
| C-term    | CO-NH2  | 4   | 174.5 |

## Compound 1d (X: Cl) strategy B

### AcCys(d)GlyValAlaNH<sub>2</sub>

A) Structure of benzofurazan/peptide conjugates

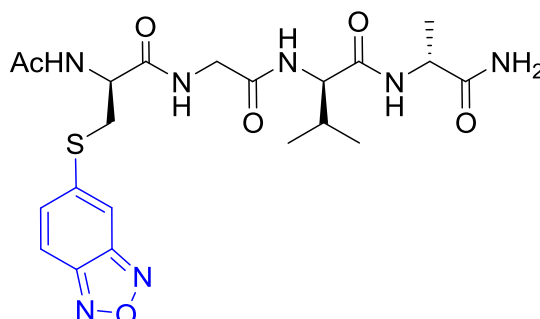

B) preparative HPLC *t*R= 17.190 min; ES-MS: calculated [M + H]<sup>+</sup>, 508.1973, found *m/z* 508.2059 ([M+H]). White solid

HPLC profile of the reaction crude product:

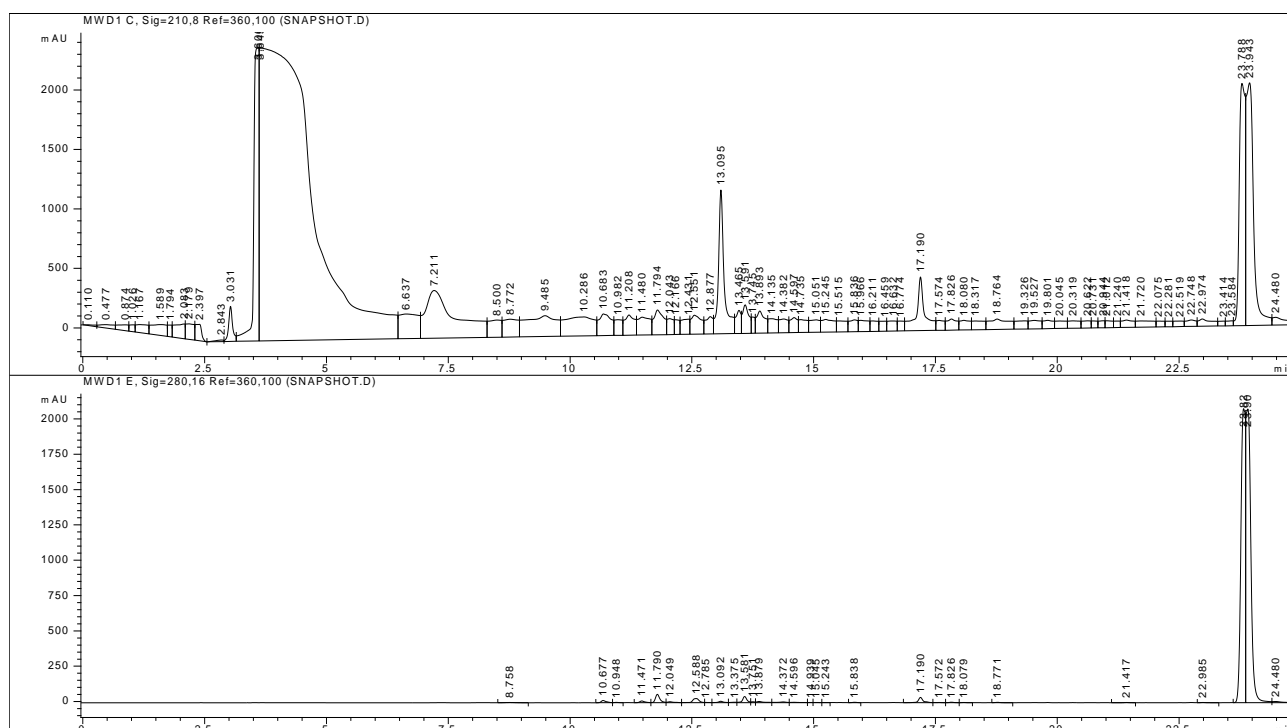

MS spectrum of **1d** after purification:

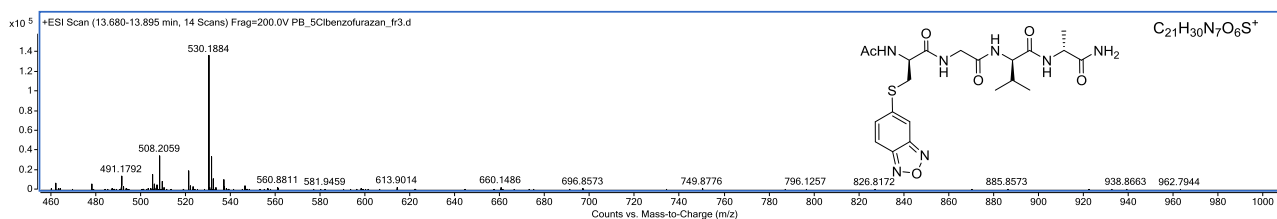

C) <sup>1</sup>H-NMR (600 MHz, DMSO-d<sub>6</sub>, 298 K)

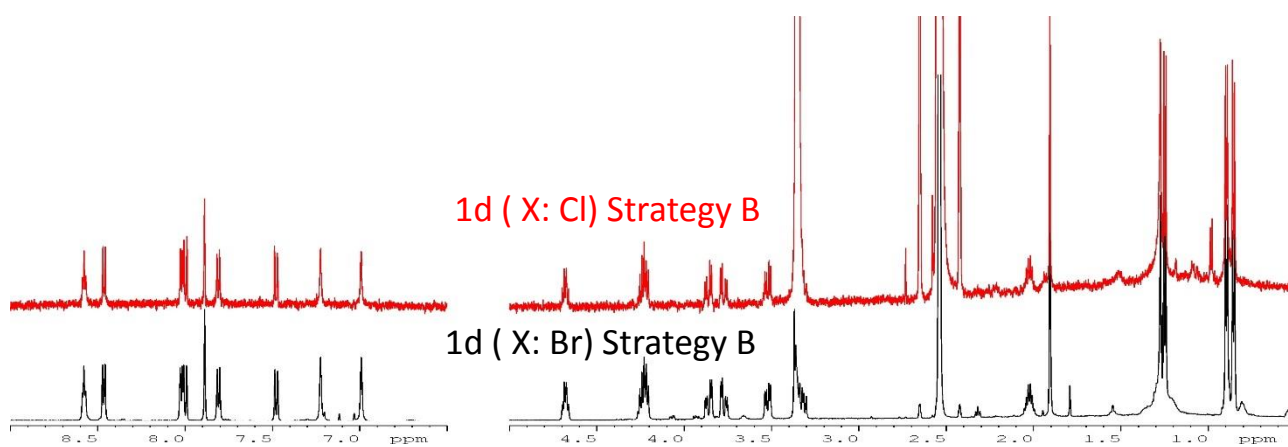

<sup>1</sup>H-NMR spectra of **1d** obtained from the bromine precursor (bottom) and the chlorine precursor (top)

## Compound 2a strategy A

### AcGlyTrpCys(a)HisValAlaNH<sub>2</sub>

A) Structure of benzofurazan/peptide conjugates

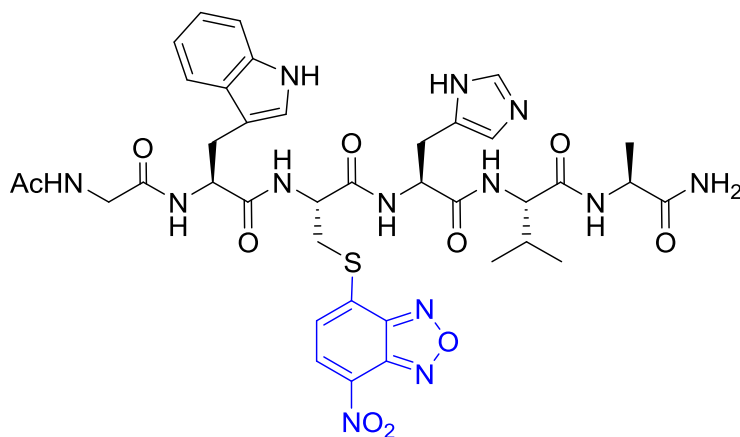

B) preparative HPLC *t*<sub>R</sub> = 18.069 min; ES-MS: calculated [M + H]<sup>+</sup>, 876.3206, found *m/z* 876.3182 ([M+H]<sup>+</sup>). yellow solid

HPLC profile of the reaction crude product:

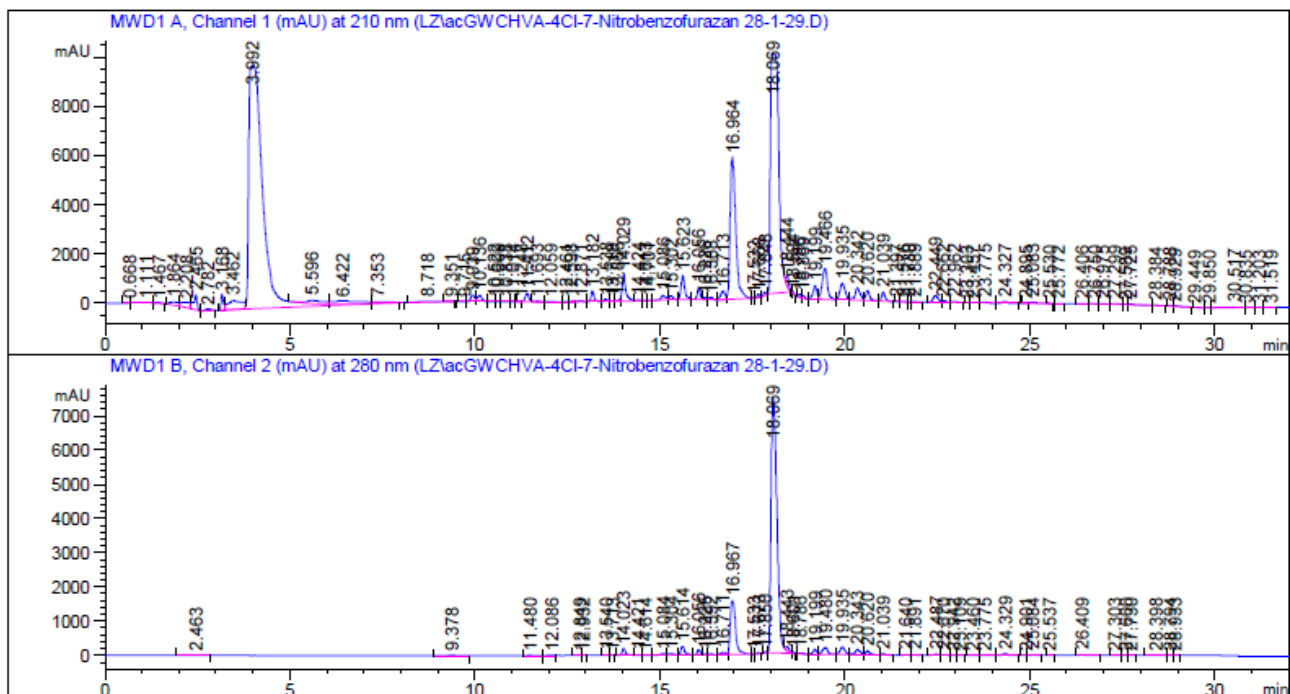

MS spectrum of **2a** after purification:

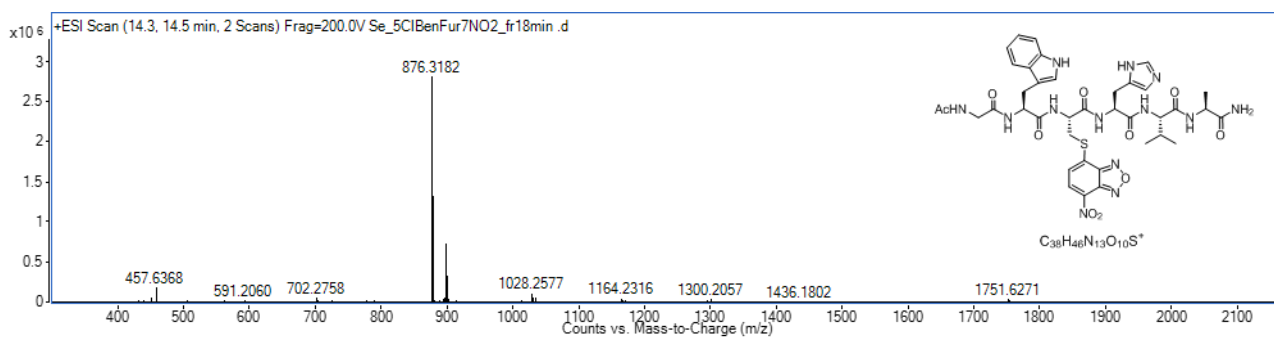

C) <sup>1</sup>H-NMR (600 MHz, dms<sub>o</sub>-d<sub>6</sub>, 298 K)

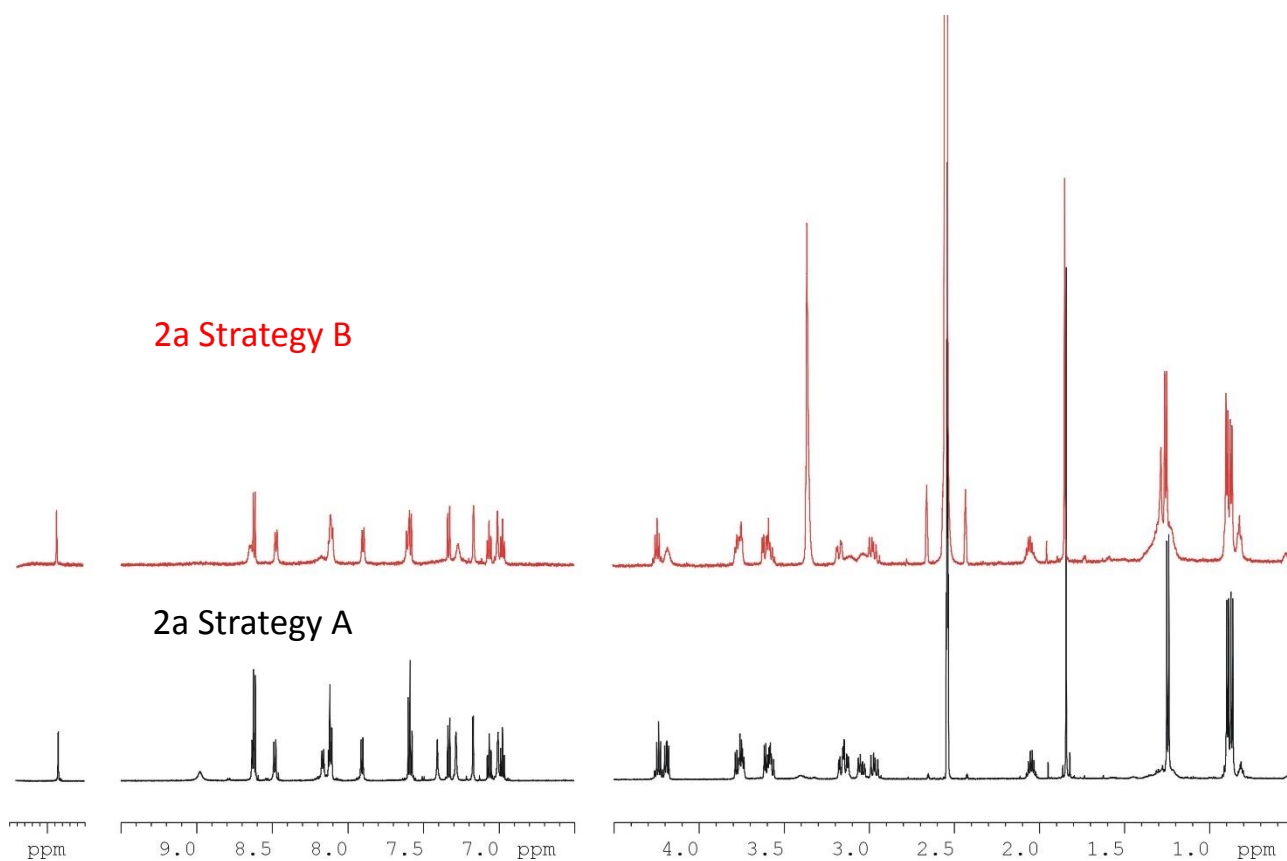

<sup>1</sup>H NMR spectra of product **2a** obtained by means of the activated molecular sieve synthetic approach (top) and by the standard approach with DIPEA as the base (bottom).

## Compound 2a strategy B

AcGlyTrpCys(a)HisValAlaNH<sub>2</sub>

### A) Structure of benzofurazan/peptide conjugates

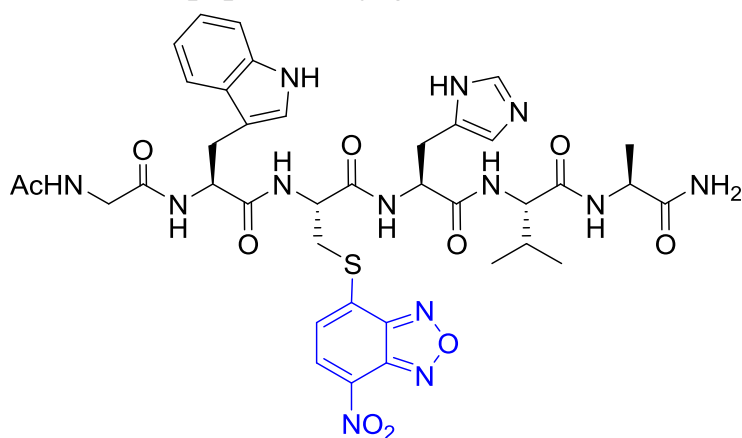

B) preparative HPLC *t*R= 18.302 min; ES-MS: calculated [M + H]<sup>+</sup>, 876.3206, found *m/z* 876.3658 ([M+H]<sup>+</sup>). yellow solid

HPLC profile of the reaction crude product:

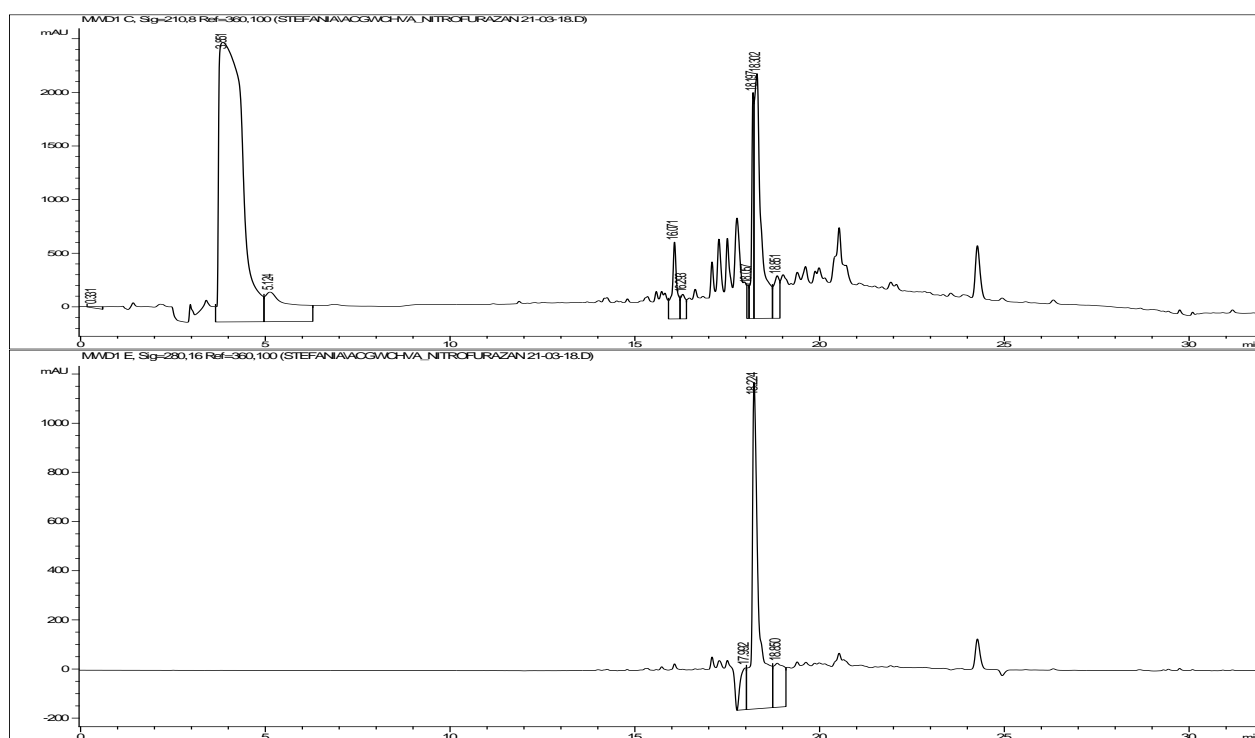

MS spectrum of **2a** after purification:

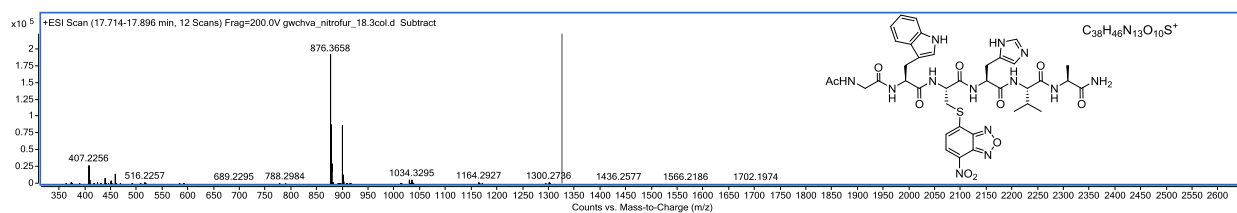

C)  $^1\text{H-NMR}$  (600 MHz,  $\text{dms}\text{-d}_6$ , 298 K)

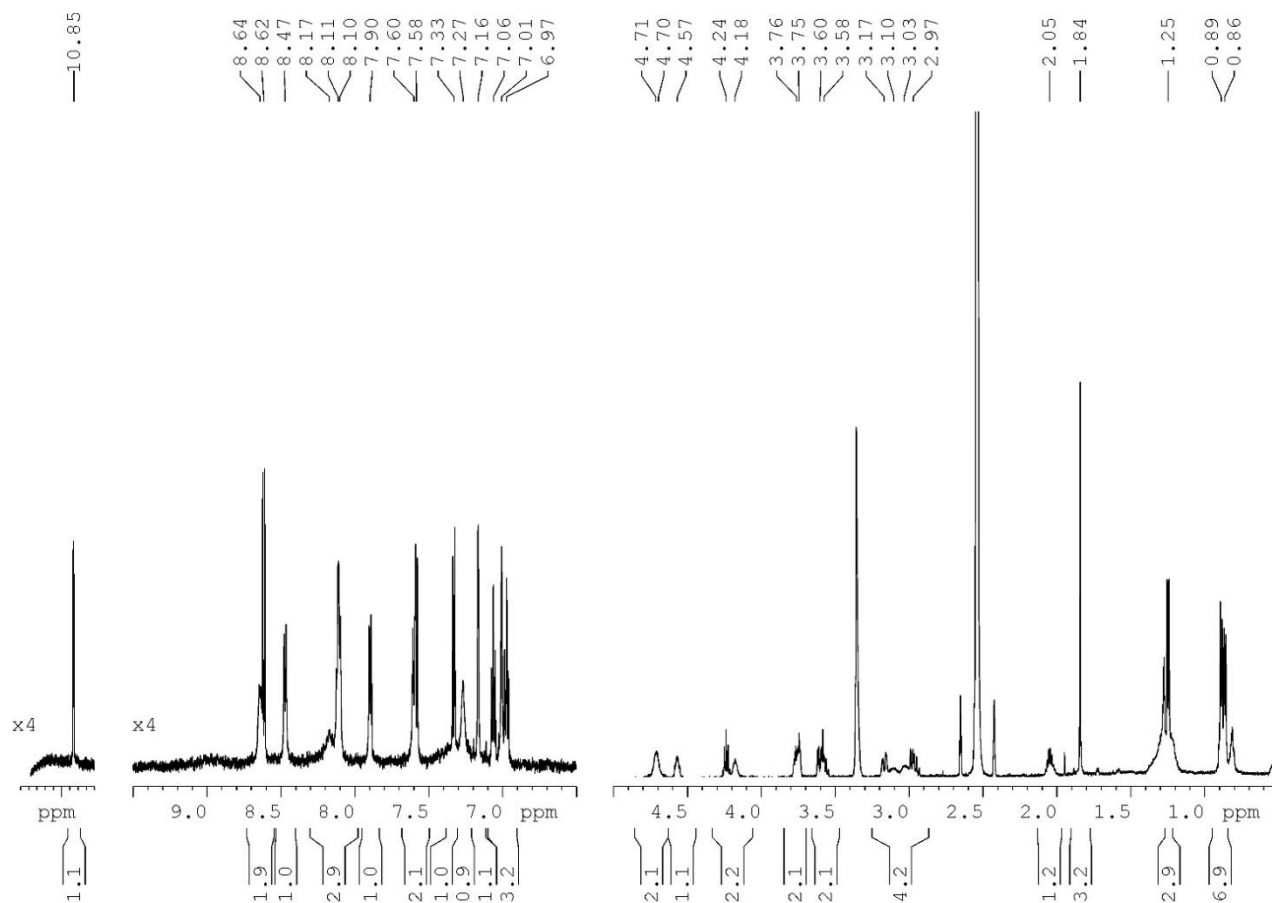



D) Expansions of 2D TOCSY and 2D ROESY NMR (600 MHz,  $\text{dmso-}d_6$ , 298K)

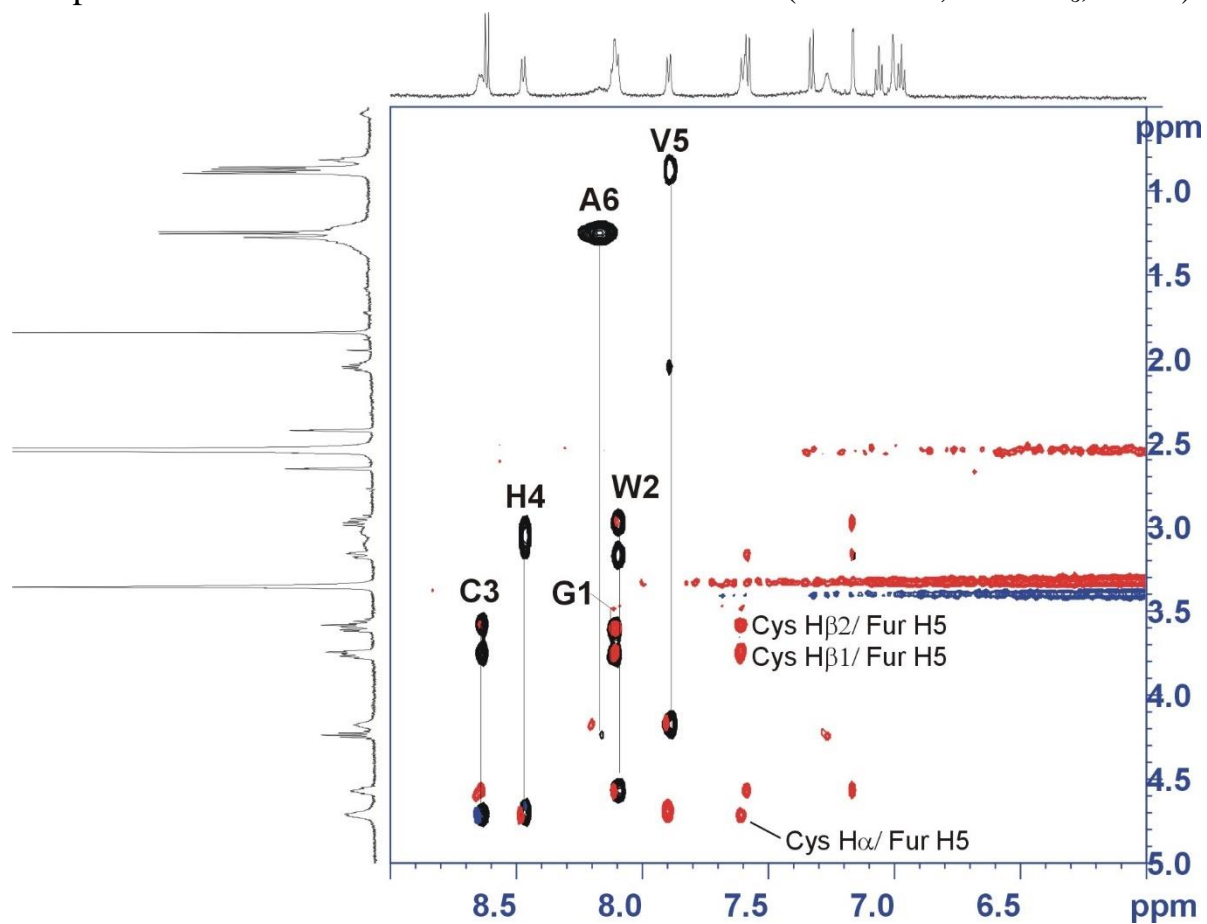

## E) Assignment table

### Compound 2a

| RES       | SPIN ID | SEQ | ppm   |
|-----------|---------|-----|-------|
| N-term Ac | CH3     | 1   | 1.84  |
| GLY       | H       | 1   | 8.11  |
| GLY       | HA1     | 1   | 3.76  |
| GLY       | HA2     | 1   | 3.60  |
| TRP       | H       | 2   | 8.10  |
| TRP       | HA      | 2   | 4.57  |
| TRP       | HB1     | 2   | 3.17  |
| TRP       | HB2     | 2   | 2.97  |
| TRP       | HD1     | 2   | 7.16  |
| TRP       | HE1     | 2   | 10.85 |
| TRP       | HZ2     | 2   | 7.33  |
| TRP       | HH2     | 2   | 7.06  |
| TRP       | HZ3     | 2   | 6.97  |
| TRP       | HE3     | 2   | 7.58  |
| CYS       | H       | 3   | 8.64  |
| CYS       | HA      | 3   | 4.71  |
| CYS       | HB1     | 3   | 3.70  |
| CYS       | HB2     | 3   | 3.58  |
| FUR       | H5      | 7   | 7.60  |
| FUR       | H6      | 7   | 8.62  |
| HIS       | H       | 4   | 8.47  |
| HIS       | HA      | 4   | 4.70  |
| HIS       | HB1     | 4   | 3.10  |
| HIS       | HB2     | 4   | 3.03  |
| HIS       | HD2     | 4   | 7.37  |
| HIS       | HE1     | 4   | 8.97  |
| VAL       | H       | 5   | 7.90  |
| VAL       | HA      | 5   | 4.18  |
| VAL       | HB      | 5   | 2.05  |
| VAL       | HG1     | 5   | 0.89  |
| VAL       | HG2     | 5   | 0.86  |
| ALA       | H       | 6   | 8.17  |
| ALA       | HA      | 6   | 4.24  |
| ALA       | HB      | 6   | 1.25  |
| CO-NH2    | NH1     | 6   | 7.27  |
| CO-NH2    | NH2     | 6   | 7.01  |

## Compound **2b** (X: Cl) strategy A

### AcGlyTrpCys(b)HisValAlaNH<sub>2</sub>

#### A) Structure of benzofurazan/peptide conjugates

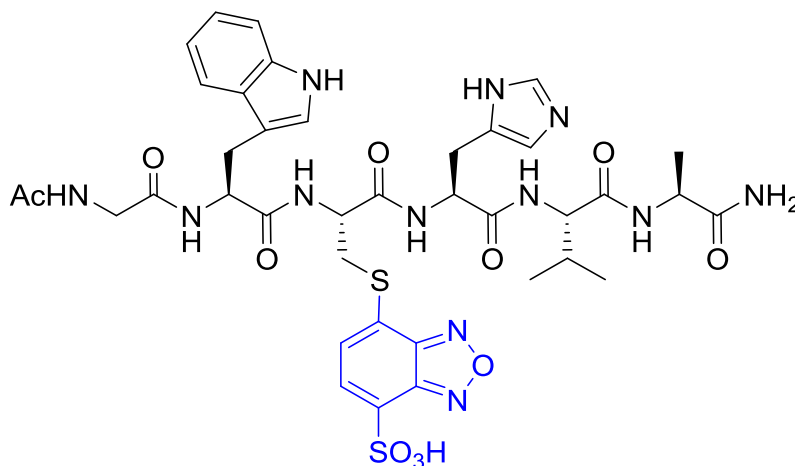

B) preparative HPLC  $t_R$  = 15.329 min; ES-MS: calculated  $[M + H]^+$ , 911.2923, found  $m/z$  911.2884 ( $[M + H]^+$ ). Yellow solid

HPLC profile of the reaction crude product:

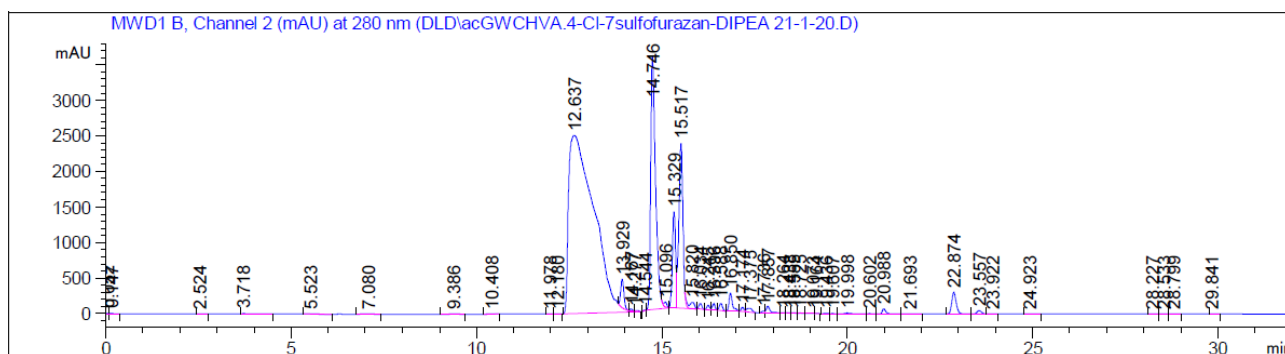

MS spectrum of **2b** after purification:

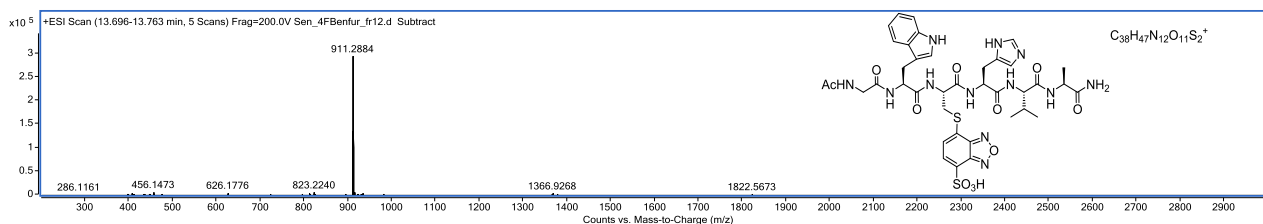

C)  $^1\text{H}$ -NMR (600 MHz,  $\text{dms}\text{-d}_6$ , 298 K)

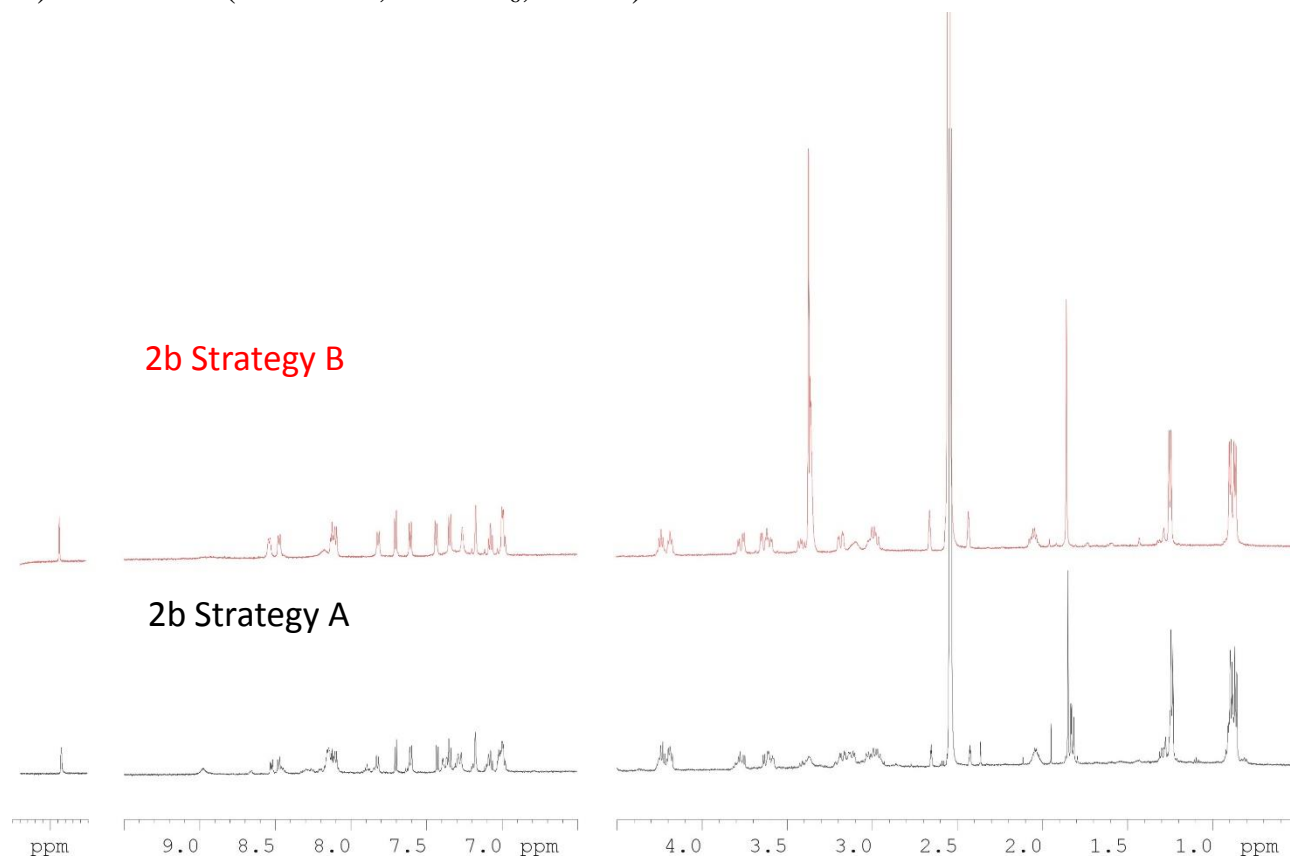

$^1\text{H}$  NMR spectra of product **2b** obtained by means of the activated molecular sieve synthetic approach (top) and by the standard approach with DIPEA as the base (bottom). The chlorinated furazan precursor was used.

## Compound 2b (X: Cl) strategy B

### AcGlyTrpCys(b)HisValAlaNH<sub>2</sub>

#### A) Structure of benzofurazan/peptide conjugates

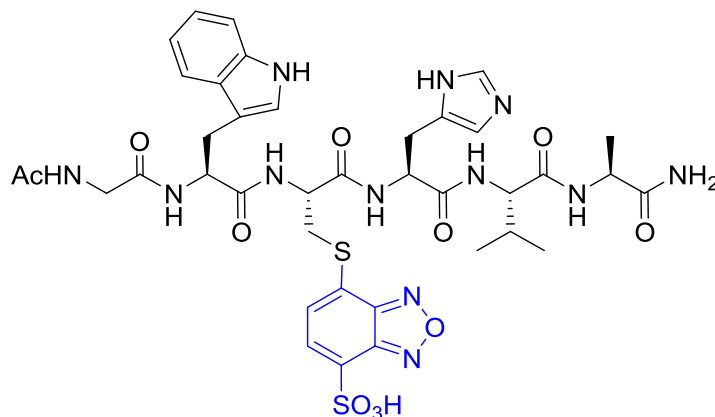

B) preparative HPLC  $t_R = 15.388$  min; ES-MS: calculated  $[M + H]^+$ , 911.2923, found  $m/z$  911.3159 ( $[M+H]^+$ ). Yellow solid

HPLC profile of the reaction crude product:

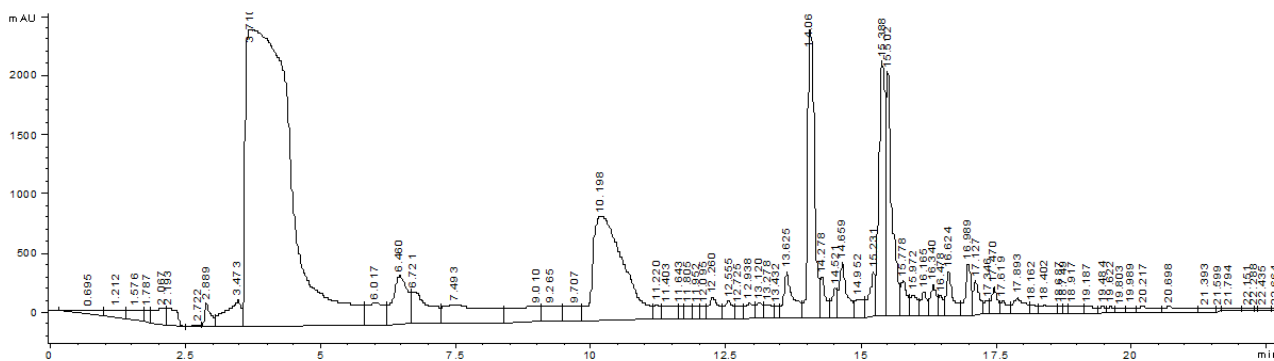

MS spectrum of **2b** after purification:

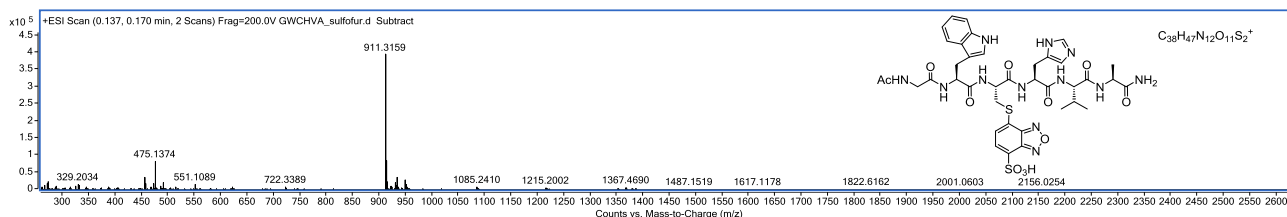

C)  $^1\text{H-NMR}$  (600 MHz,  $\text{dmsO-d}_6$ , 298 K)

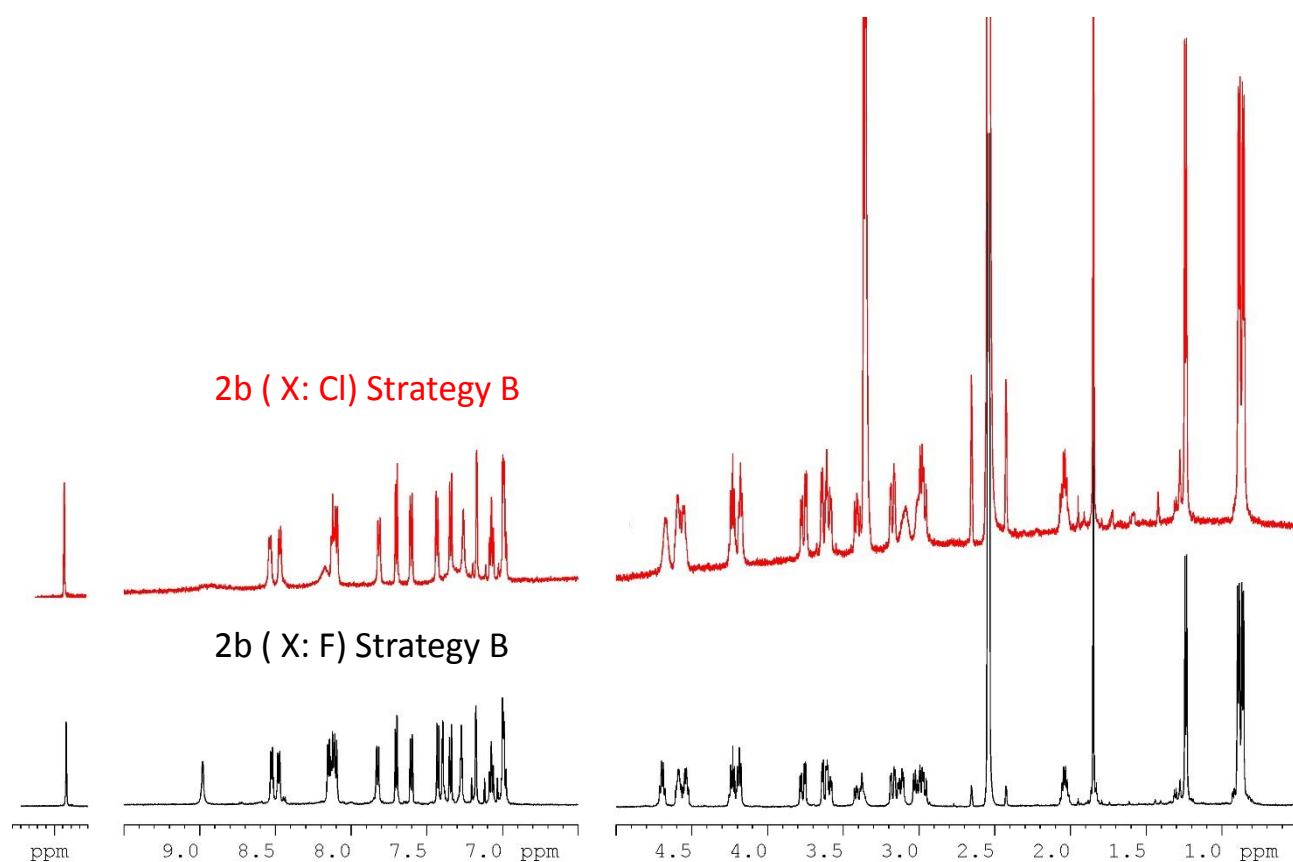

$^1\text{H-NMR}$  spectra of **2b** obtained from the fluorine precursor (bottom) and the chlorine precursor (top).

F) Fluorescence spectrum ( $\lambda_{\text{ex}} = 380 \text{ nm}$ );

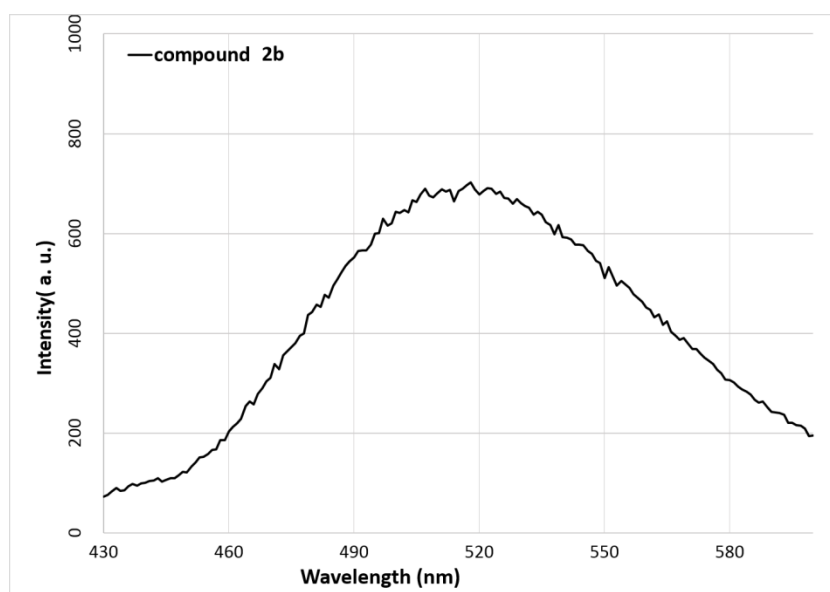

## Compound 2b (X: F) strategy A

### AcGlyTrpCys(b)HisValAlaNH<sub>2</sub>

A) Structure of benzofurazan/peptide conjugates

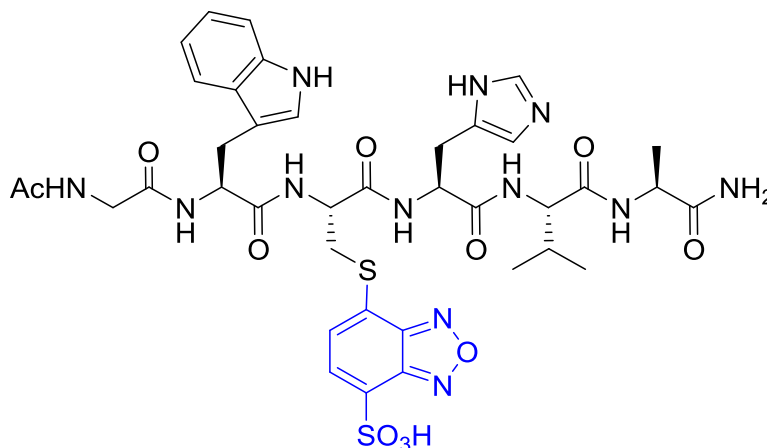

B) preparative HPLC *t*R= 21.112 min; ES-MS: calculated [M + H]<sup>+</sup>, 911.2923, found *m/z* 911.2831 ([M+H]<sup>+</sup>). Yellow solid

HPLC profile of the reaction crude product:

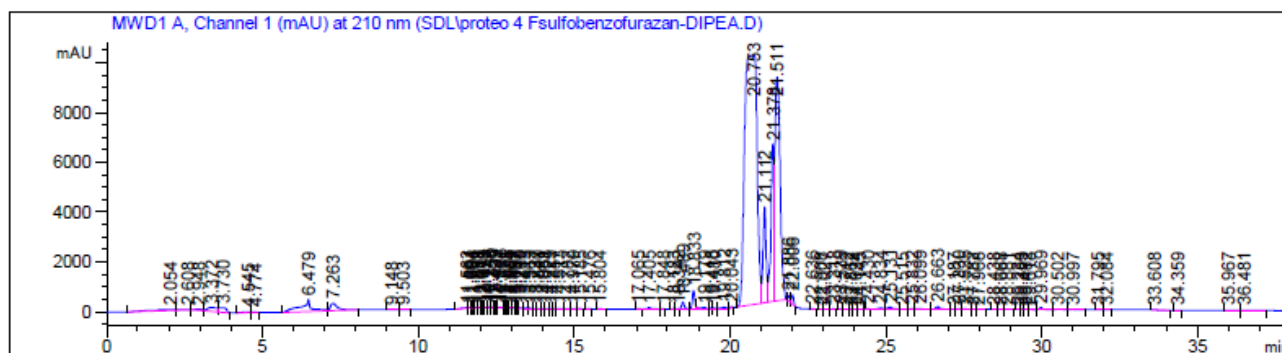

## Compound 2b (X: F) strategy B

### AcGlyTrpCys(b)HisValAlaNH<sub>2</sub>

A) Structure of benzofurazan/peptide conjugates

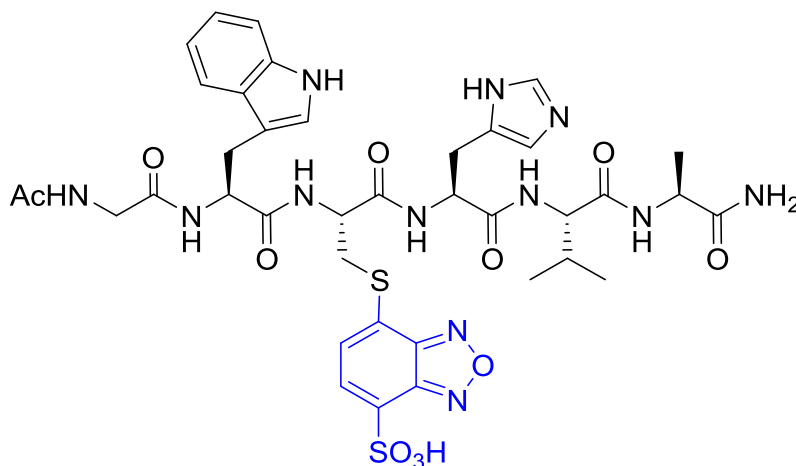

B) preparative HPLC *t*R= 15.462 min; ES-MS: calculated [M + H]<sup>+</sup>, 911.2923, found *m/z* 911.2884 ([M+H]<sup>+</sup>). Yellow solid

HPLC profile of the reaction crude product:

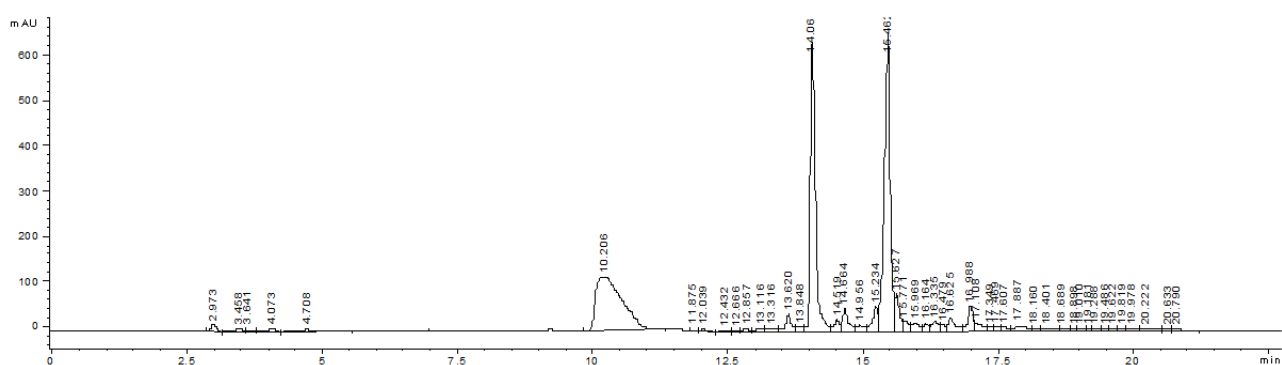

MS spectrum of **2b-F** after purification:

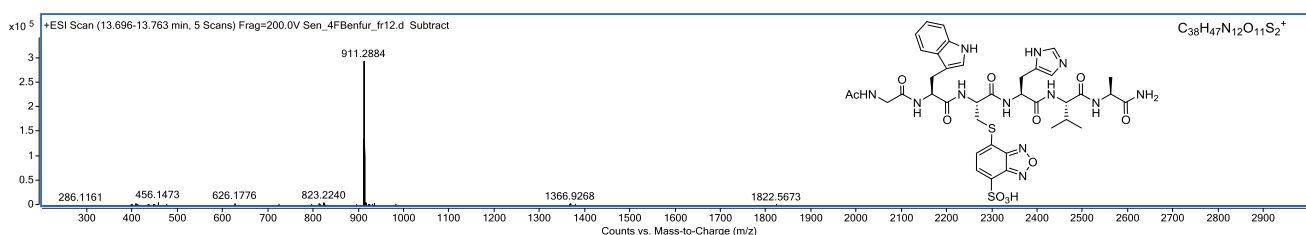



C)  $^1\text{H-NMR}$  (600 MHz,  $\text{dms}\text{-d}_6$ , 298 K)

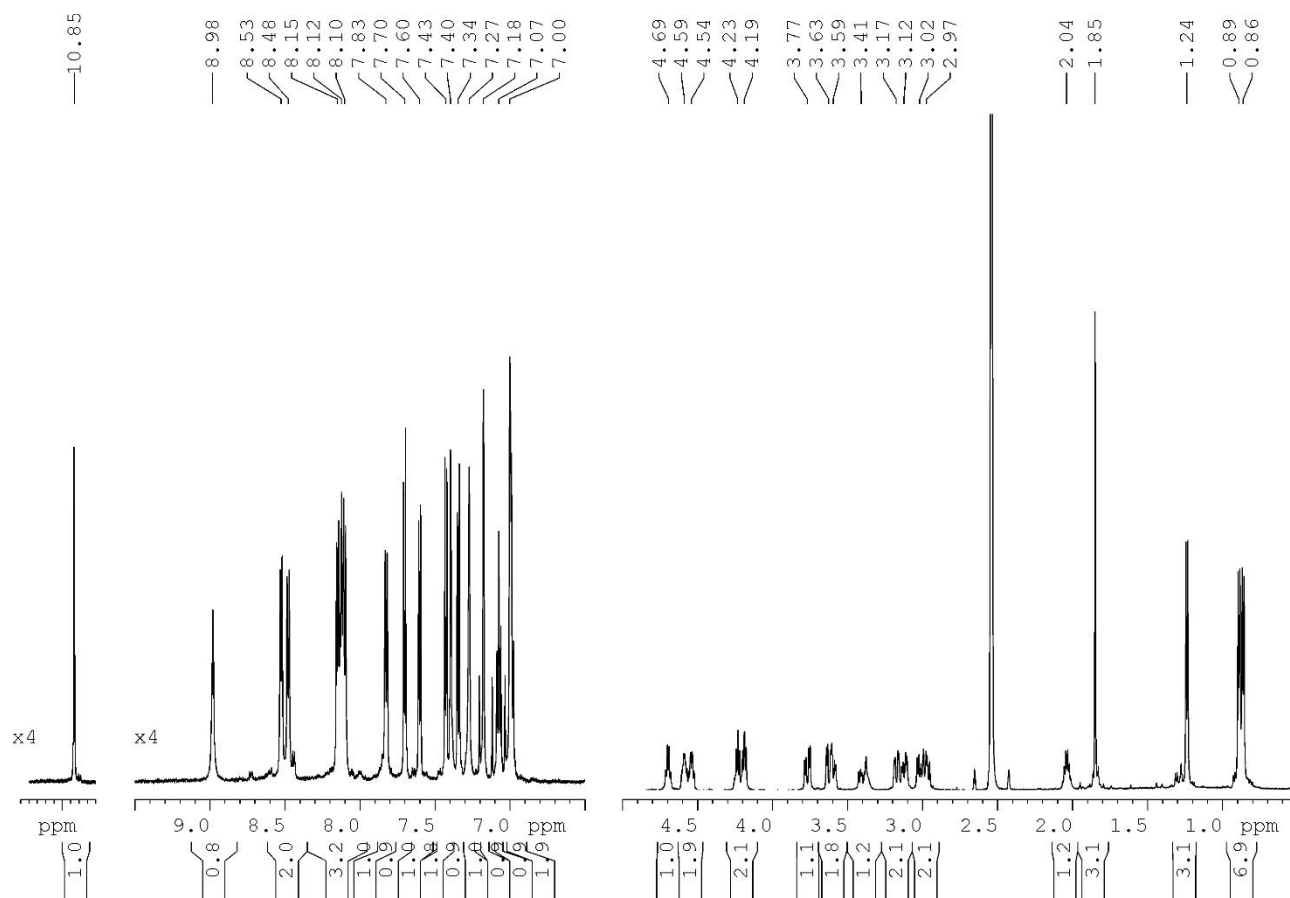

D) Expansions of 2D TOCSY and 2D ROESY NMR (600 MHz, dms<sub>o</sub>-d<sub>6</sub>, 298 K)

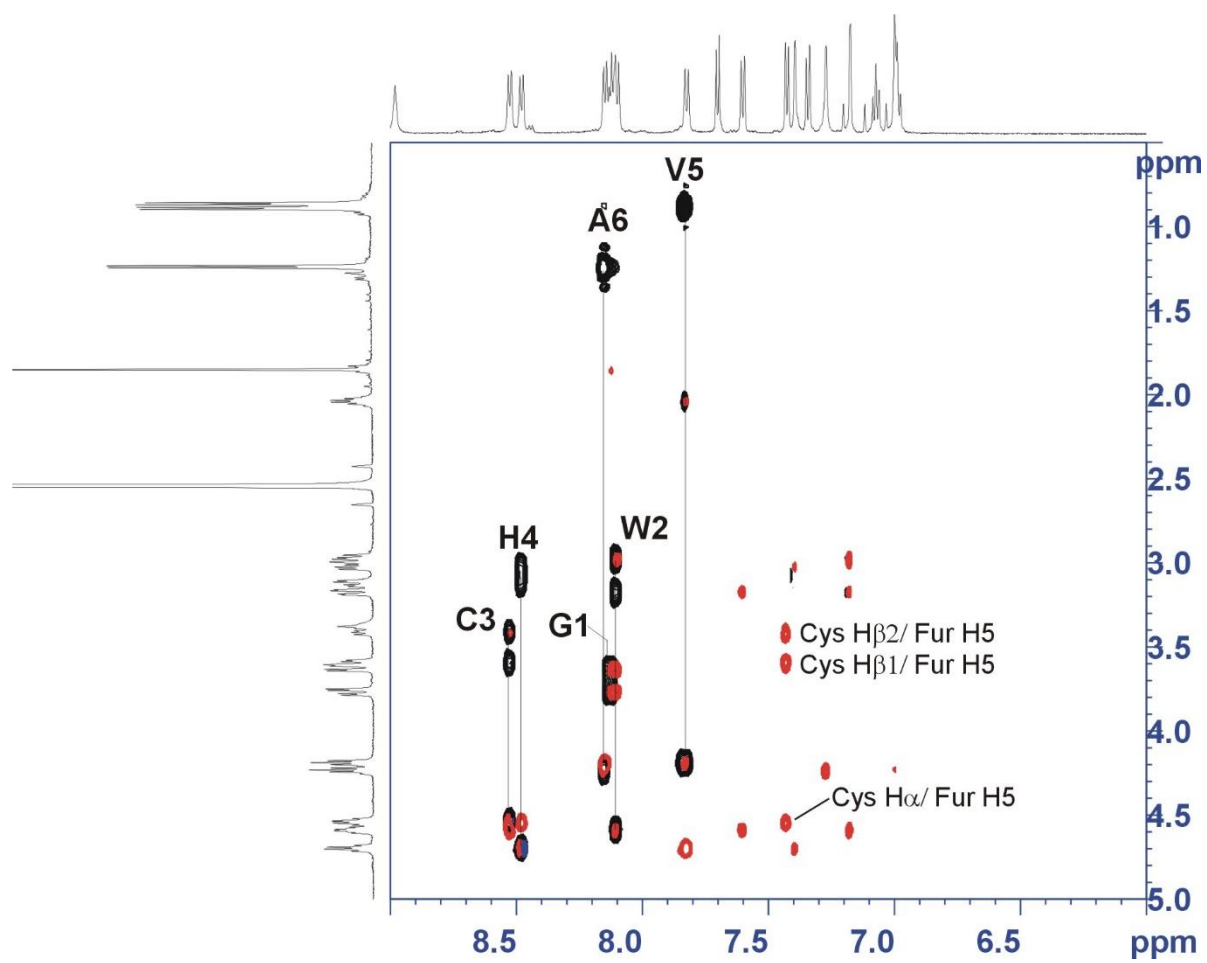

## E) Assignment table

### Compound 2b

| RES       | SPIN ID | SEQ | ppm   |
|-----------|---------|-----|-------|
| N-term Ac | CH3     | 1   | 1.85  |
| GLY       | H       | 1   | 8.12  |
| GLY       | HA1     | 1   | 3.77  |
| GLY       | HA2     | 1   | 3.63  |
| TRP       | H       | 2   | 8.10  |
| TRP       | HA      | 2   | 4.59  |
| TRP       | HB1     | 2   | 3.17  |
| TRP       | HB2     | 2   | 2.97  |
| TRP       | HD1     | 2   | 7.18  |
| TRP       | HE1     | 2   | 10.85 |
| TRP       | HZ2     | 2   | 7.34  |
| TRP       | HH2     | 2   | 7.07  |
| TRP       | HZ3     | 2   | 6.99  |
| TRP       | HE3     | 2   | 7.60  |
| CYS       | H       | 3   | 8.53  |
| CYS       | HA      | 3   | 4.54  |
| CYS       | HB1     | 3   | 3.59  |
| CYS       | HB2     | 3   | 3.41  |
| FUR       | H5      | 7   | 7.43  |
| FUR       | H6      | 7   | 7.70  |
| HIS       | H       | 4   | 8.48  |
| HIS       | HA      | 4   | 4.69  |
| HIS       | HB1     | 4   | 3.12  |
| HIS       | HB2     | 4   | 3.02  |
| HIS       | HD2     | 4   | 7.40  |
| HIS       | HE1     | 4   | 8.98  |
| VAL       | H       | 5   | 7.83  |
| VAL       | HA      | 5   | 4.19  |
| VAL       | HB      | 5   | 2.04  |
| VAL       | HG1     | 5   | 0.89  |
| VAL       | HG2     | 5   | 0.86  |
| ALA       | H       | 6   | 8.15  |
| ALA       | HA      | 6   | 4.23  |
| ALA       | HB      | 6   | 1.24  |
| CO-NH2    | NH1     | 6   | 7.27  |
| CO-NH2    | NH2     | 6   | 7.00  |

## Compound 2c (X: F) strategy A

AcGly(c)TrpCysHisValAlaNH<sub>2</sub>

A) Structure of benzofurazan/peptide conjugates

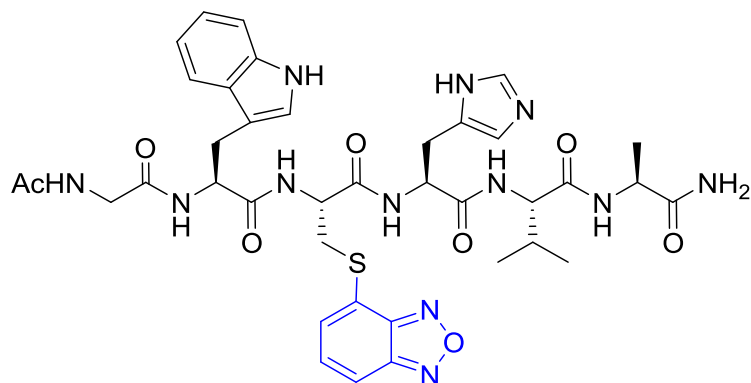

B) Preparative HPLC *tR* = 17.725 min; ES-MS: calculated [M + H]<sup>+</sup>, 831.3355, found *m/z* 831.3327 ([M+H]<sup>+</sup>). White solid

HPLC profile of the reaction crude product:

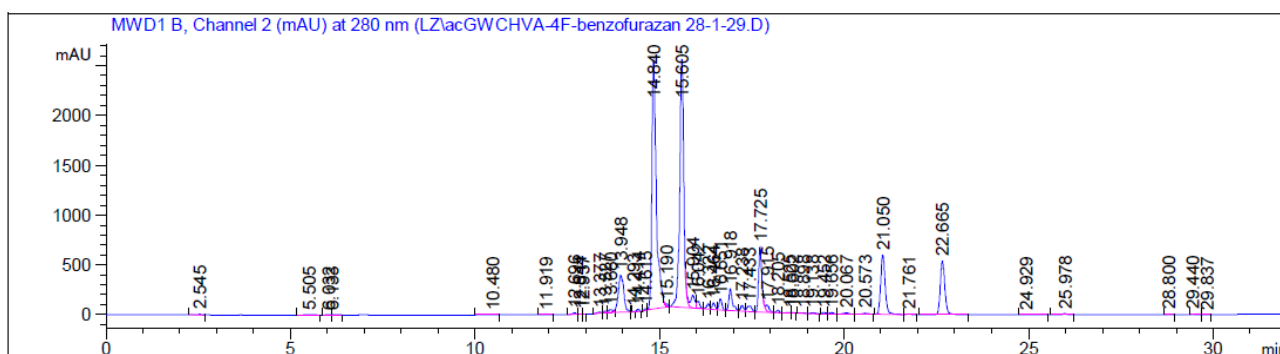

MS spectrum of 2c after purification:

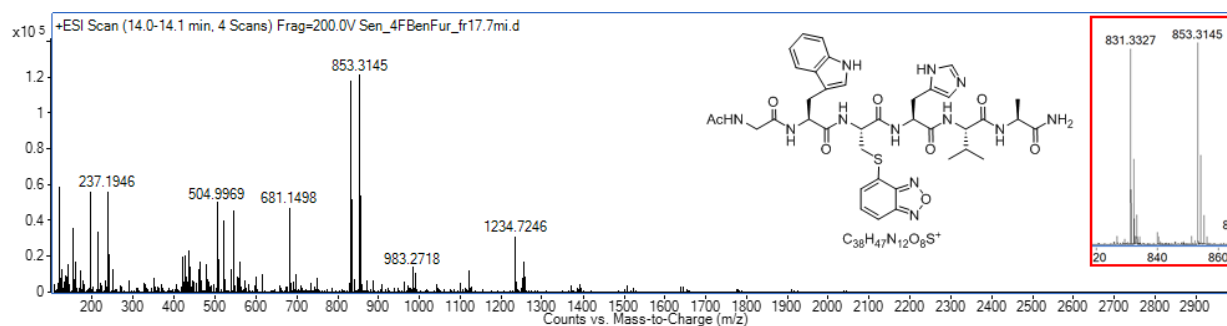

C) <sup>1</sup>H-NMR (600 MHz, dms<sub>o</sub>-d<sub>6</sub>, 298 K): the collected amount of the final product resulted insufficient for the NMR analysis

## Compound 2c (X: F) strategy B

AcGly(c)TrpCysHisValAlaNH<sub>2</sub>

### A) Structure of benzofurazan/peptide conjugates

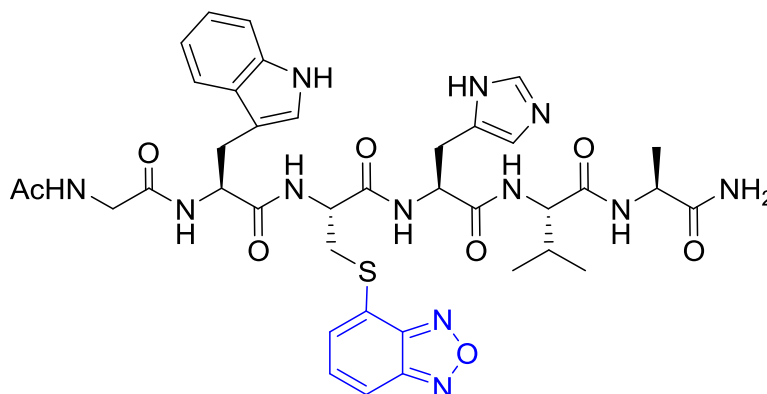

### B) preparative HPLC *t*R= 17.670 min; ES-MS: calculated [M + H]<sup>+</sup>, 831.3355, found *m/z* 831.3279 ([M+H]<sup>+</sup>). White solid

### HPLC profile of the reaction crude product:

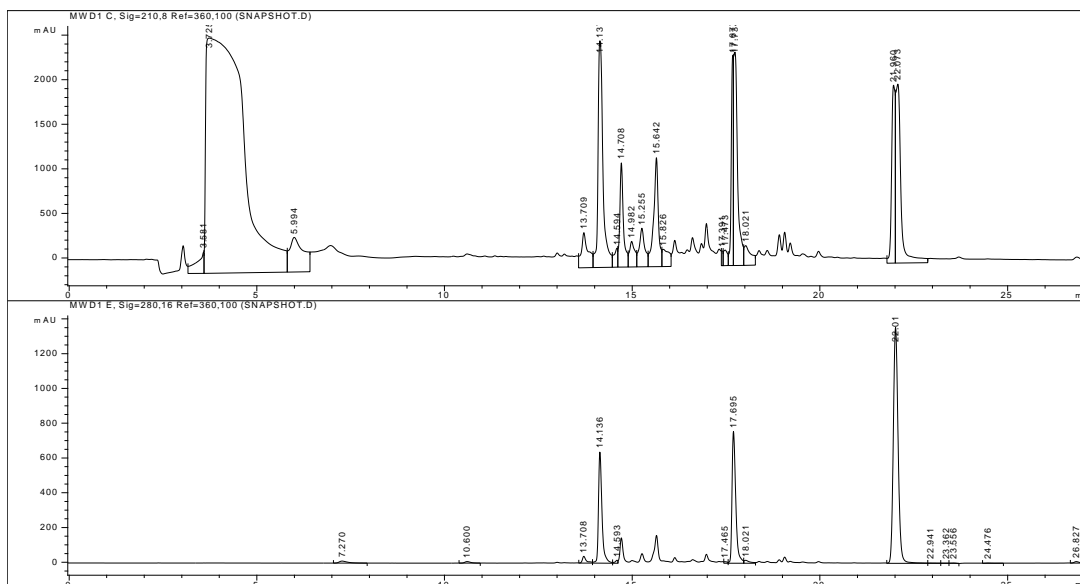

MS spectrum of **2c** after purification:

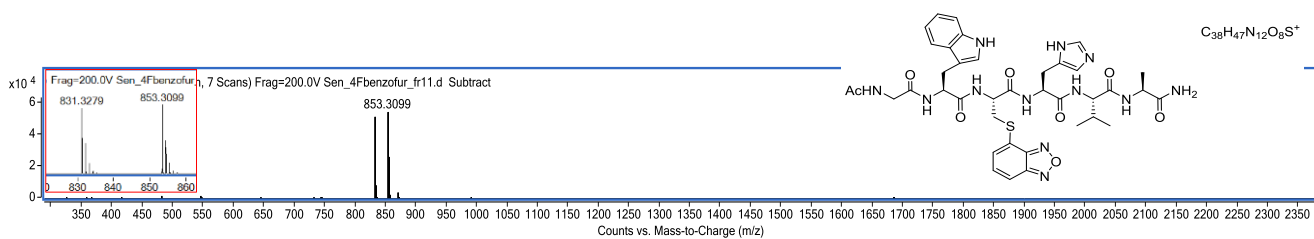

C) <sup>1</sup>H-NMR (600 MHz, dms<sub>o</sub>-d<sub>6</sub>, 298 K)

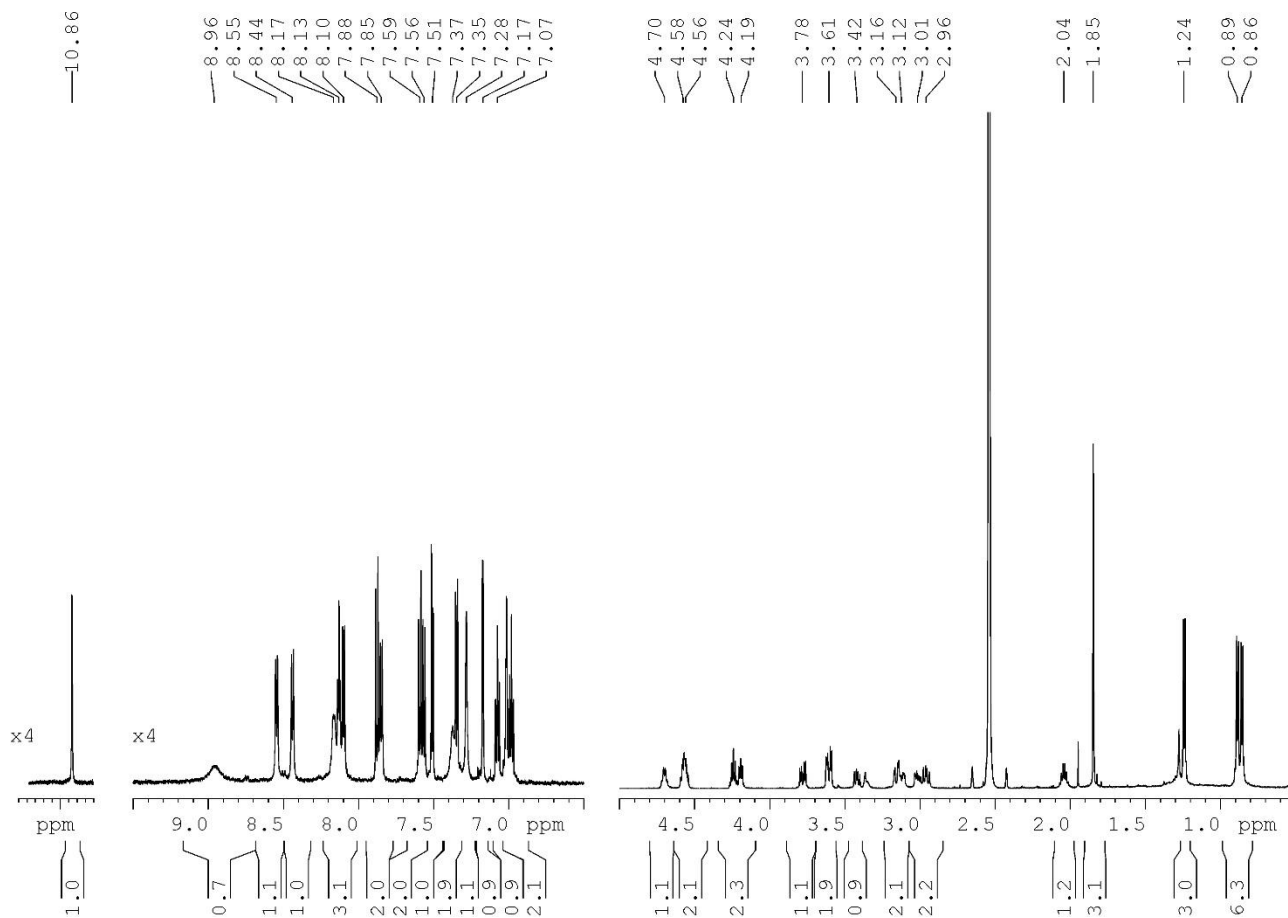

D) Expansions of 2D TOCSY and 2D ROESY NMR (600 MHz, dms<sub>o</sub>-d<sub>6</sub>, 298 K)

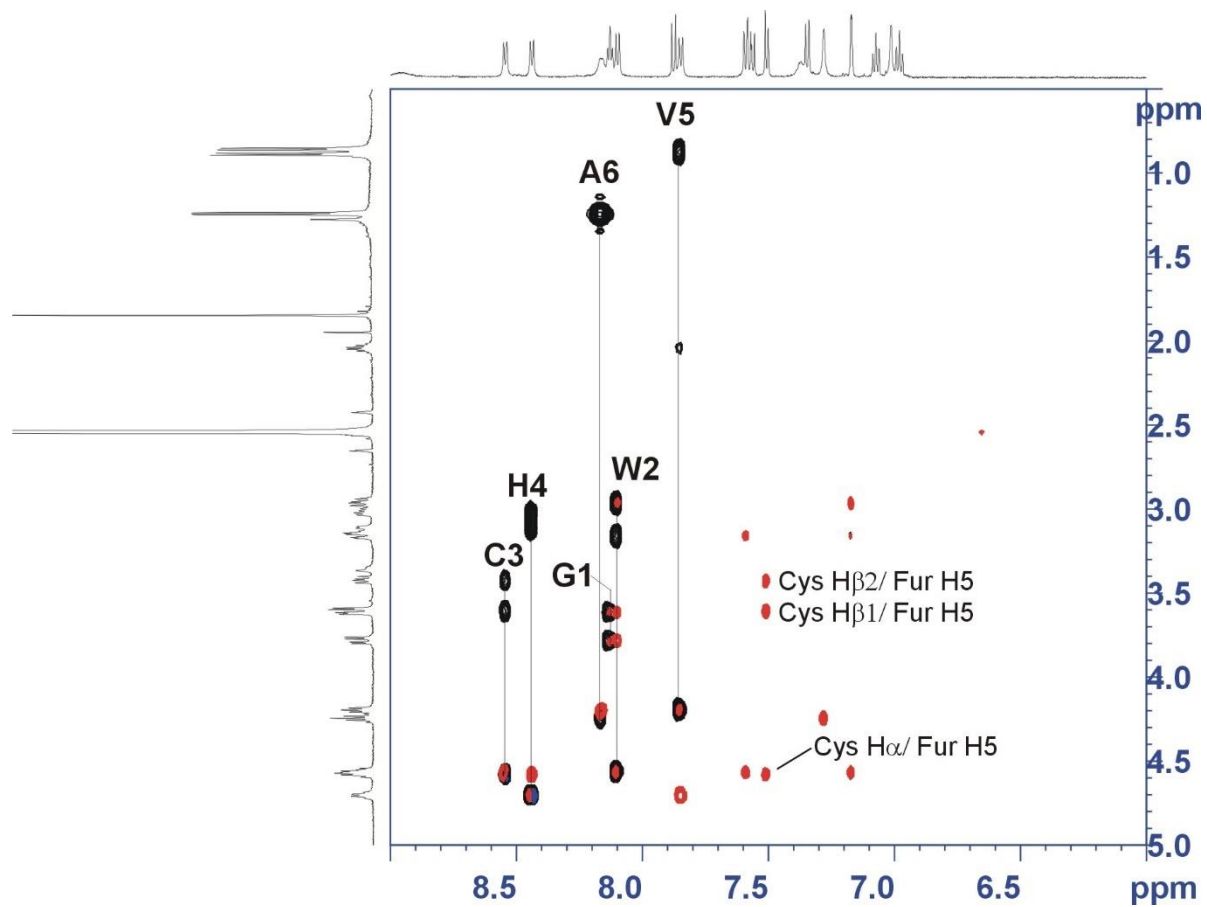

## E) Assignment table

### Compound 2c

| RES       | SPIN ID | SEQ | ppm   |
|-----------|---------|-----|-------|
| N-term Ac | CH3     | 1   | 1.85  |
| GLY       | H       | 1   | 8.13  |
| GLY       | HA1     | 1   | 3.78  |
| GLY       | HA2     | 1   | 3.61  |
| TRP       | H       | 2   | 8.10  |
| TRP       | HA      | 2   | 4.56  |
| TRP       | HB1     | 2   | 3.16  |
| TRP       | HB2     | 2   | 2.96  |
| TRP       | HD1     | 2   | 7.17  |
| TRP       | HE1     | 2   | 10.87 |
| TRP       | HZ2     | 2   | 7.35  |
| TRP       | HH2     | 2   | 7.07  |
| TRP       | HZ3     | 2   | 6.98  |
| TRP       | HE3     | 2   | 7.59  |
| CYS       | H       | 3   | 8.55  |
| CYS       | HA      | 3   | 4.58  |
| CYS       | HB1     | 3   | 3.61  |
| CYS       | HB2     | 3   | 3.42  |
| FUR       | H5      | 7   | 7.51  |
| FUR       | H6      | 7   | 7.56  |
| FUR       | H7      | 7   | 7.88  |
| HIS       | H       | 4   | 8.44  |
| HIS       | HA      | 4   | 4.70  |
| HIS       | HB1     | 4   | 3.12  |
| HIS       | HB2     | 4   | 3.01  |
| HIS       | HD2     | 4   | 7.37  |
| HIS       | HE1     | 4   | 8.96  |
| VAL       | H       | 5   | 7.85  |
| VAL       | HA      | 5   | 4.19  |
| VAL       | HB      | 5   | 2.04  |
| VAL       | HG1     | 5   | 0.89  |
| VAL       | HG2     | 5   | 0.86  |
| ALA       | H       | 6   | 8.17  |
| ALA       | HA      | 6   | 4.24  |
| ALA       | HB      | 6   | 1.24  |
| CO-NH2    | NH1     | 6   | 7.28  |
| CO-NH2    | NH2     | 6   | 7.01  |



**Compound 2c (X: Cl) strategy A**  
AcGly(c)TrpCysHisValAlaNH<sub>2</sub>

A) Structure of benzofurazan/peptide conjugates

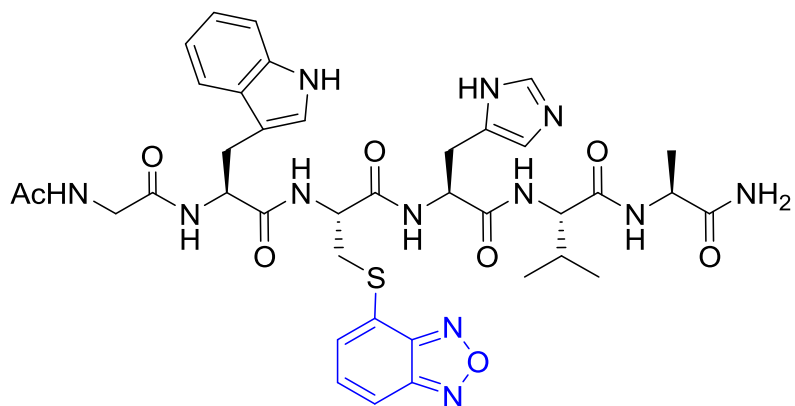

B) Yield (2c) after RP-HPLC purification: 0% .

## Compound 2c (X: Cl) strategy B

AcGly(c)TrpCysHisValAlaNH<sub>2</sub>

### A) Structure of benzofurazan/peptide conjugates

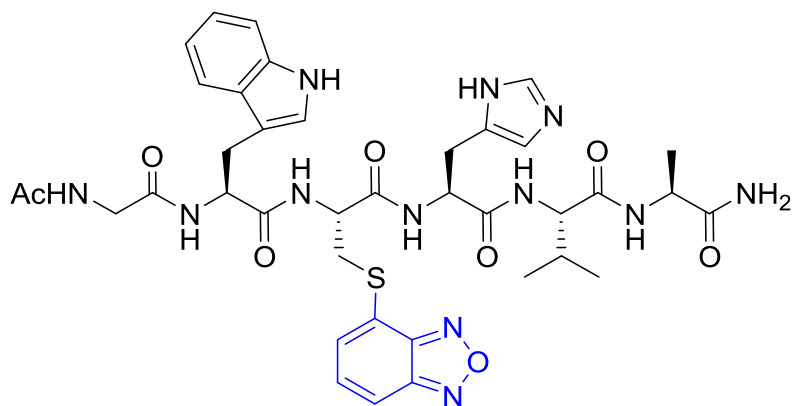

B) preparative HPLC *t*R= 17.726 min; ES-MS: calculated [M + H]<sup>+</sup>, 831.3355, found *m/z* 831.3321 ([M+H]<sup>+</sup>). White solid

HPLC profile of the reaction crude product:

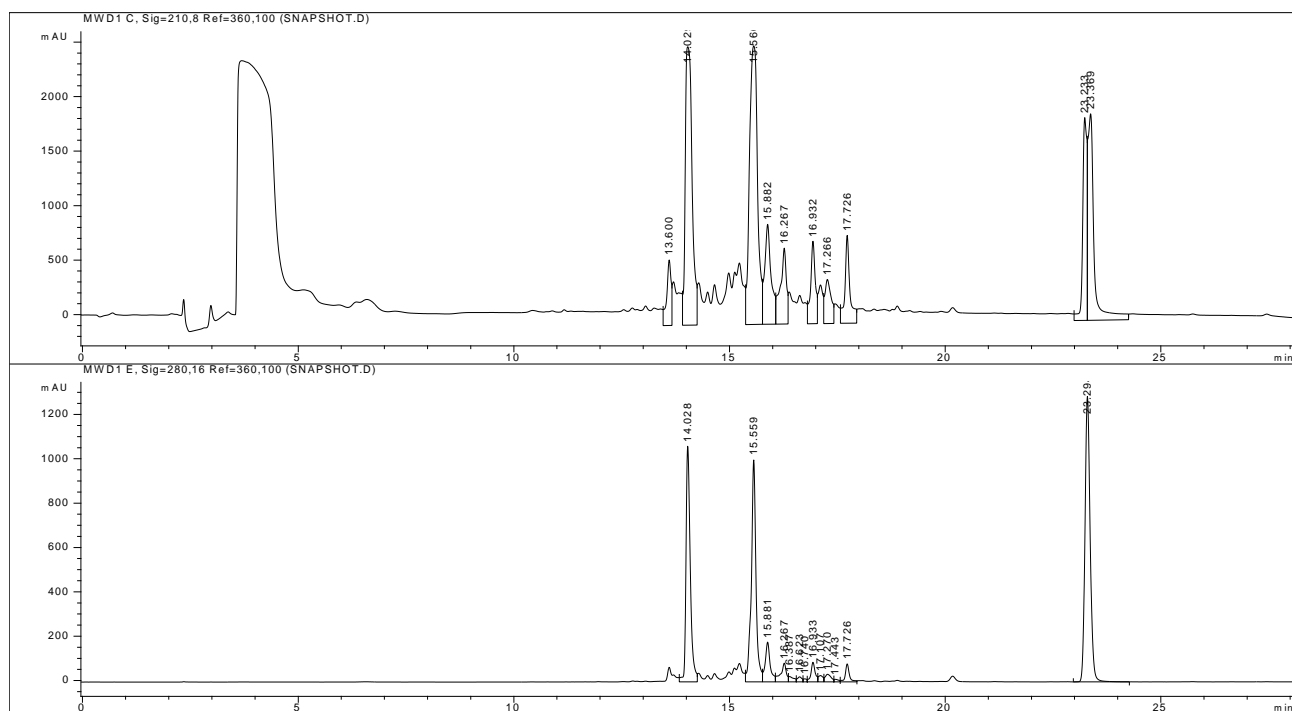

MS spectrum of 2c after purification:

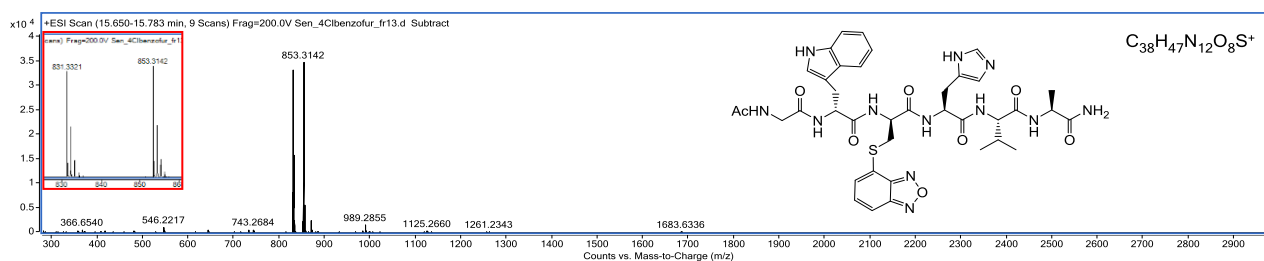

C) <sup>1</sup>H-NMR (600 MHz, dms<sup>o</sup>-d<sub>6</sub>, 298 K): the collected amount of the final product resulted insufficient for the NMR analysis

**Compound 2d (X: Br) strategy A**  
AcGly(d)TrpCysHisValAlaNH<sub>2</sub>

A) Structure of benzofurazan/peptide conjugates

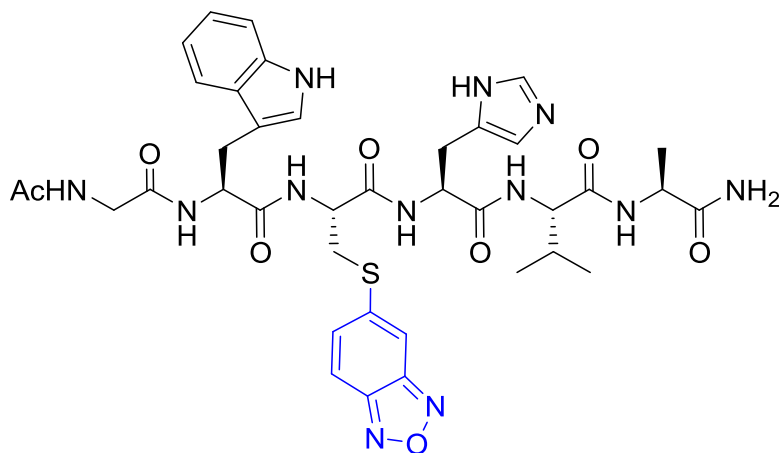

B) Yield (**2d-Br**) after RP-HPLC purification: 0%.

## Compound 2d (X: Br) strategy B AcGly(d)TrpCysHisValAlaNH<sub>2</sub>

### A) Structure of benzofurazan/peptide conjugates

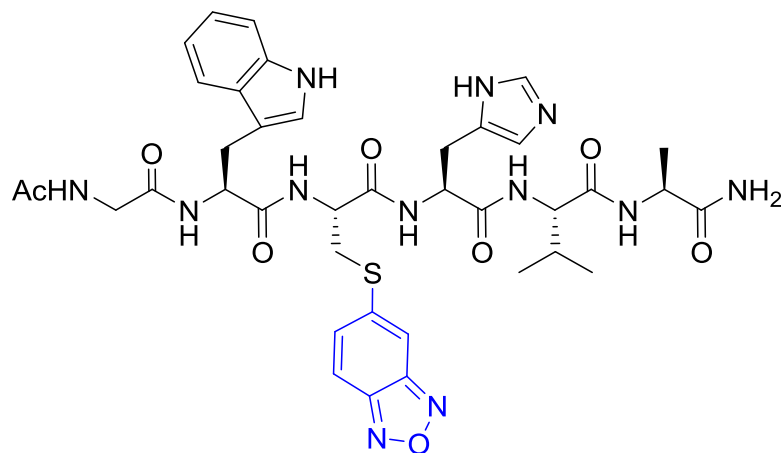

B) preparative HPLC *t*R= 17.838 min; ES-MS: calculated [M + H]<sup>+</sup>, 831.3355, found *m/z* 831.3337 ([M+H]<sup>+</sup>). White solid

HPLC profile of the reaction crude product:

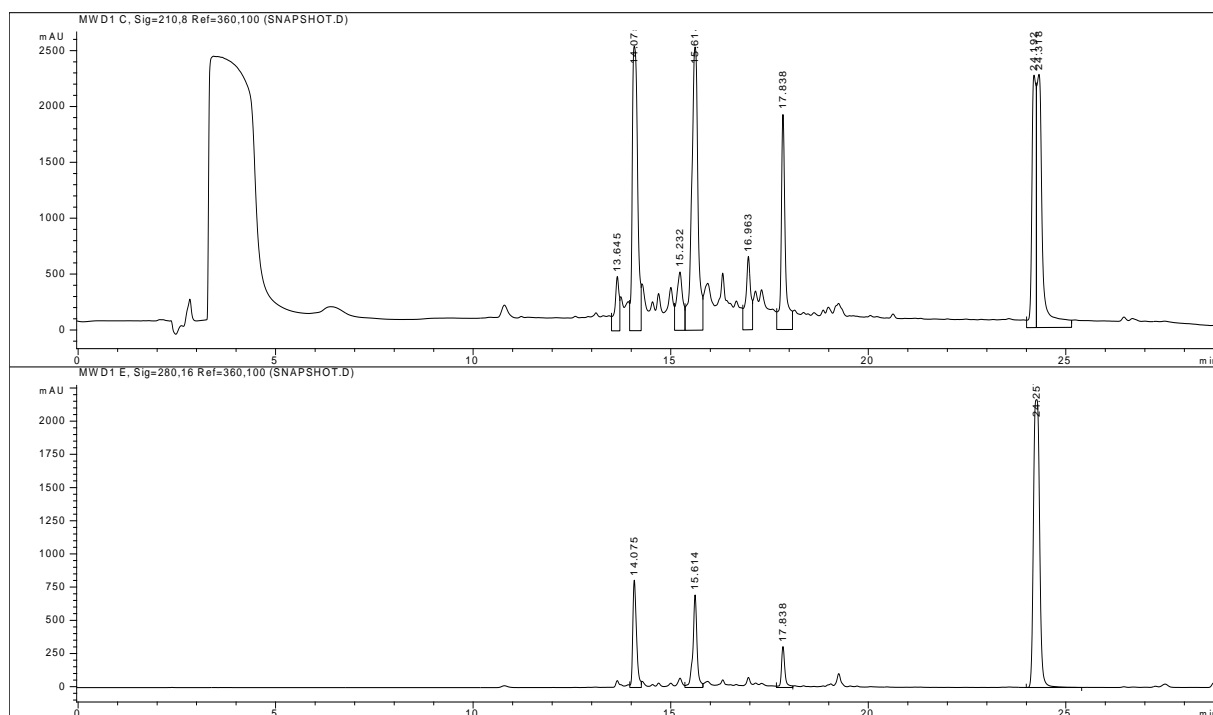

MS spectrum of **2d** after purification:

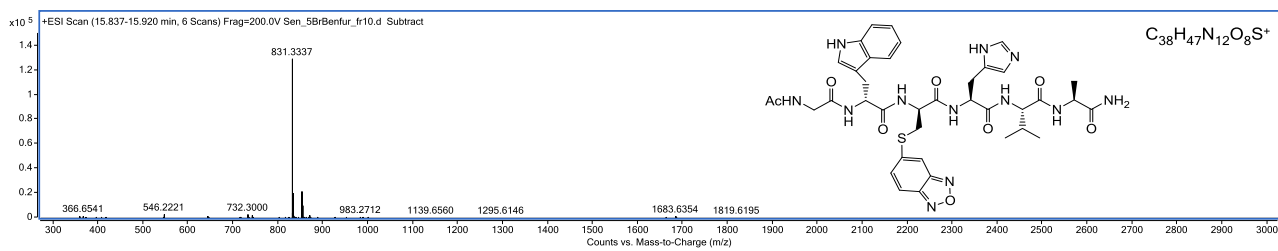

C)  $^1H$ -NMR (600 MHz,  $dms\text{-}d_6$ , 298 K)

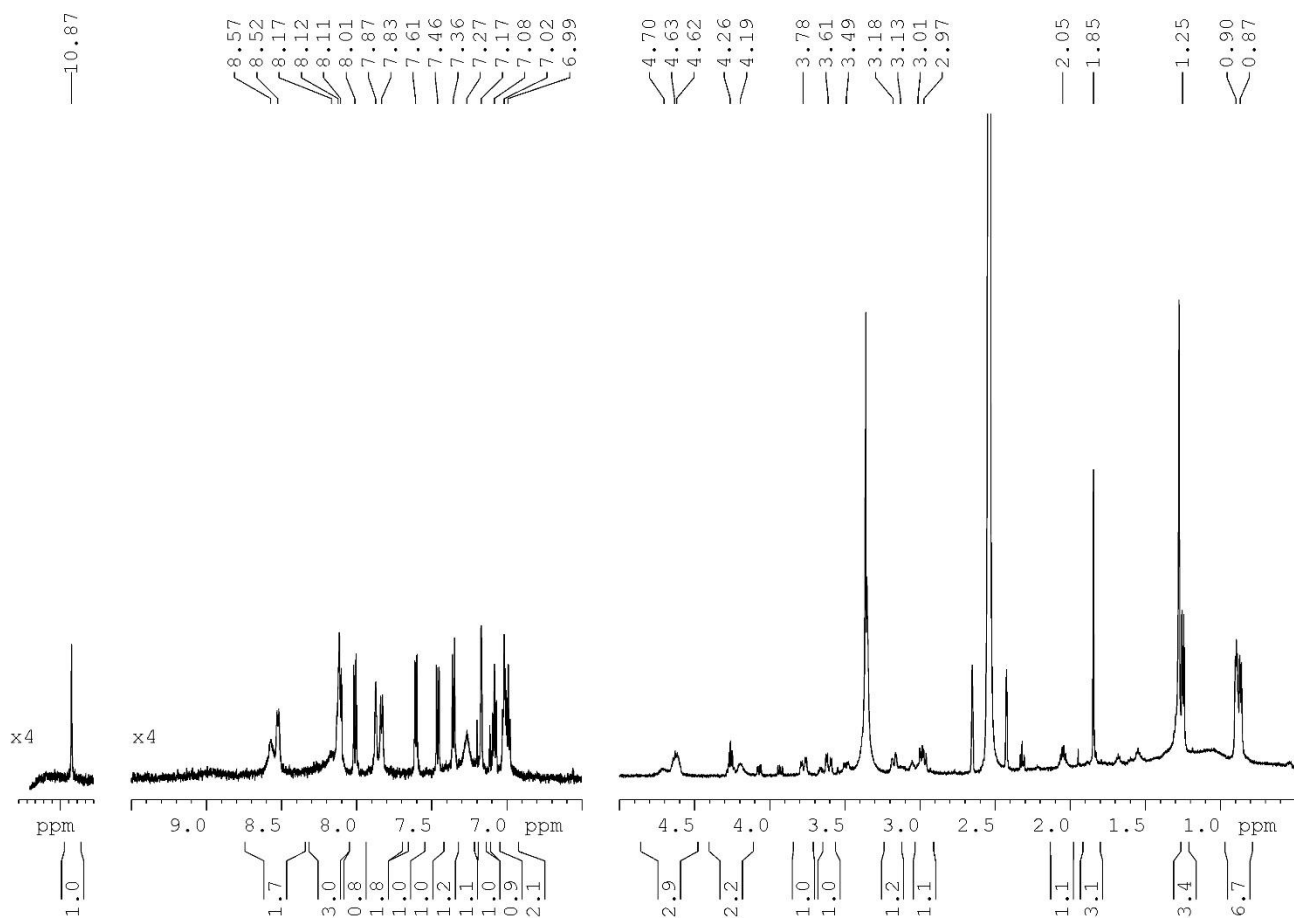

D) Expansions of 2D TOCSY and 2D ROESY NMR (600 MHz, dms<sub>o</sub>-d<sub>6</sub>, 298 K)

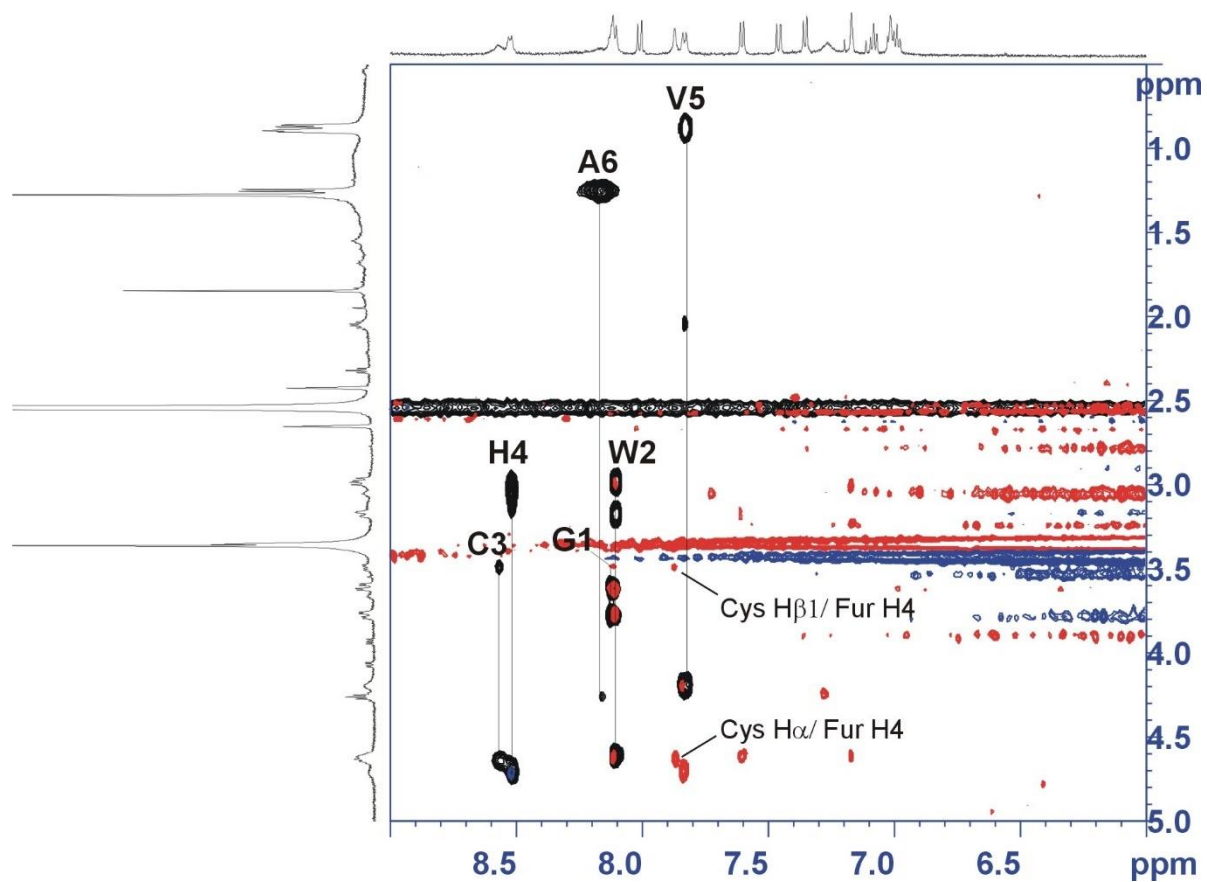

## E) Assignment table

### Compound 2d

| RES       | SPIN ID | SEQ | ppm   |
|-----------|---------|-----|-------|
| N-term Ac | CH3     | 1   | 1.85  |
| GLY       | H       | 1   | 8.12  |
| GLY       | HA1     | 1   | 3.78  |
| GLY       | HA2     | 1   | 3.61  |
| TRP       | H       | 2   | 8.11  |
| TRP       | HA      | 2   | 4.62  |
| TRP       | HB1     | 2   | 3.18  |
| TRP       | HB2     | 2   | 2.97  |
| TRP       | HD1     | 2   | 7.17  |
| TRP       | HE1     | 2   | 10.87 |
| TRP       | HZ2     | 2   | 7.36  |
| TRP       | HH2     | 2   | 7.08  |
| TRP       | HZ3     | 2   | 6.99  |
| TRP       | HE3     | 2   | 7.61  |
| CYS       | H       | 3   | 8.57  |
| CYS       | HA      | 3   | 4.63  |
| CYS       | HB1     | 3   | 3.49  |
| CYS       | HB2     | 3   | nd    |
| FUR       | H6      | 7   | 7.46  |
| FUR       | H7      | 7   | 8.01  |
| FUR       | H4      | 7   | 7.87  |
| HIS       | H       | 4   | 8.52  |
| HIS       | HA      | 4   | 4.70  |
| HIS       | HB1     | 4   | 3.13  |
| HIS       | HB2     | 4   | 3.01  |
| HIS       | HD2     | 4   | nd    |
| HIS       | HE1     | 4   | 8.97  |
| VAL       | H       | 5   | 7.83  |
| VAL       | HA      | 5   | 4.19  |
| VAL       | HB      | 5   | 2.05  |
| VAL       | HG1     | 5   | 0.90  |
| VAL       | HG2     | 5   | 0.87  |
| ALA       | H       | 6   | 8.17  |
| ALA       | HA      | 6   | 4.26  |
| ALA       | HB      | 6   | 1.25  |
| CO-NH2    | NH1     | 6   | 7.27  |
| CO-NH2    | NH2     | 6   | 7.02  |



**Compound 2d (X: Cl) strategy A**  
AcGly(d)TrpCysHisValAlaNH<sub>2</sub>

A) Structure of benzofurazan/peptide conjugates

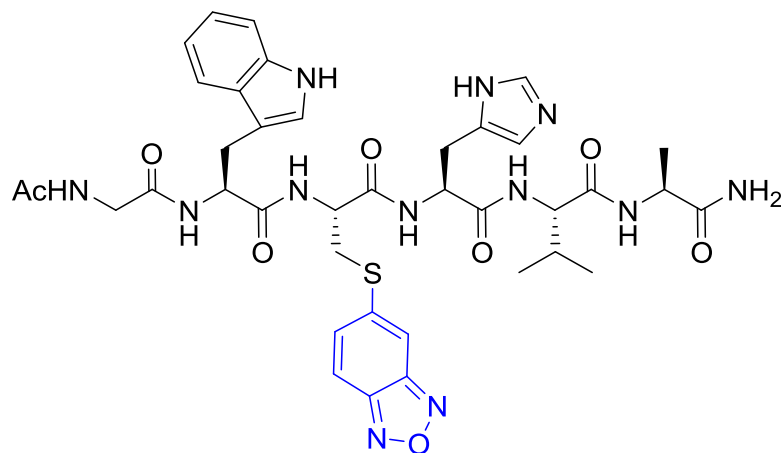

B) Yield (**2d-Cl**) after RP-HPLC purification: 0%.

## Compound 2d (X: Cl) strategy B

### AcGly(d)TrpCysHisValAlaNH<sub>2</sub>

A) Structure of benzofurazan/peptide conjugates

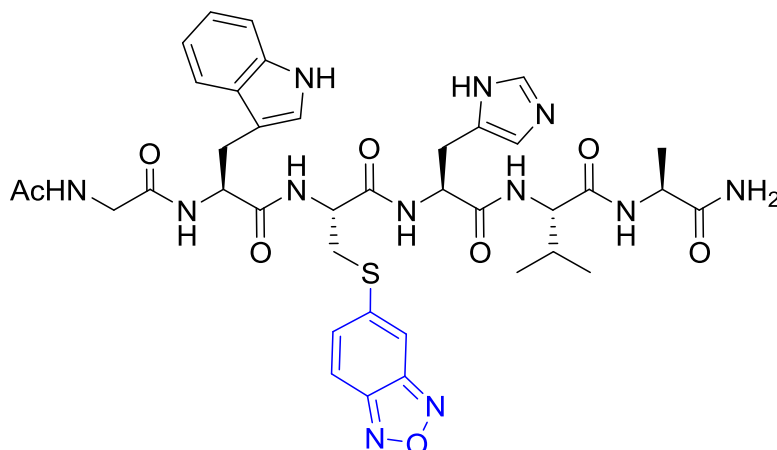

B) preparative HPLC *t*R= 17.944 min; ES-MS: calculated [M + H]<sup>+</sup>, 831.3355, found *m/z* 831.3344 ([M+H]<sup>+</sup>). White solid

HPLC profile of the reaction crude product:

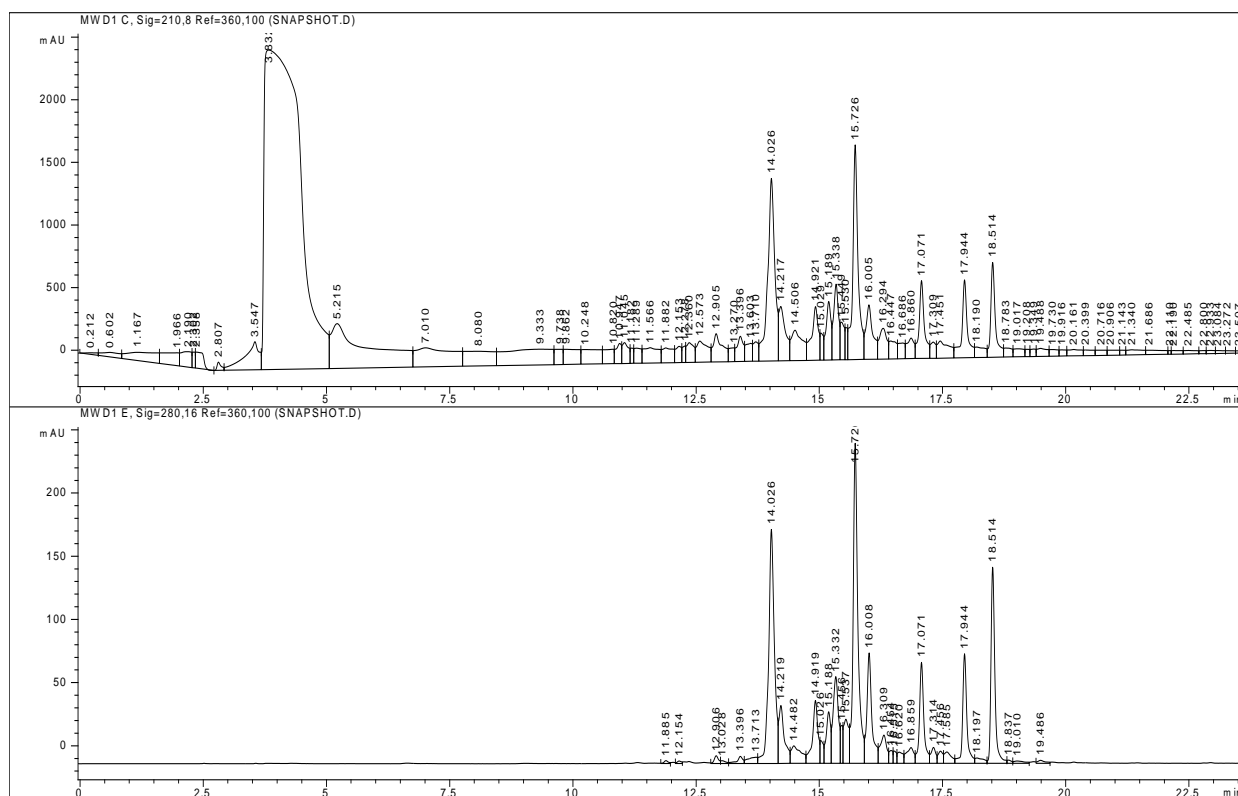

MS spectrum of **2d** after purification:

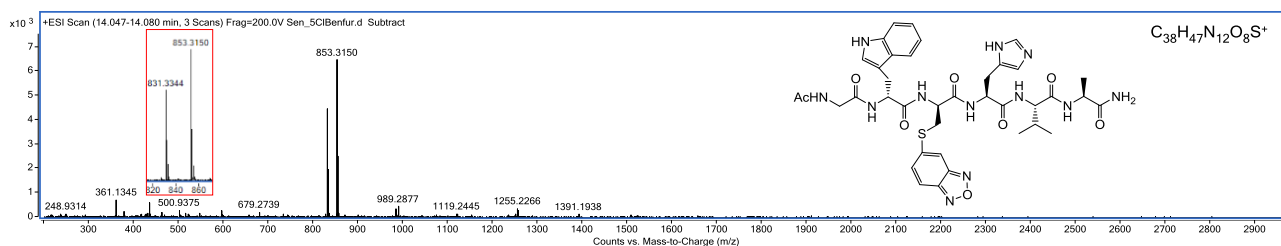

C) <sup>1</sup>H-NMR (600 MHz, dms<sup>o</sup>-d<sub>6</sub>, 298 K): the collected amount of the final product resulted not sufficient for for a good quality <sup>1</sup>HNMR spectrum

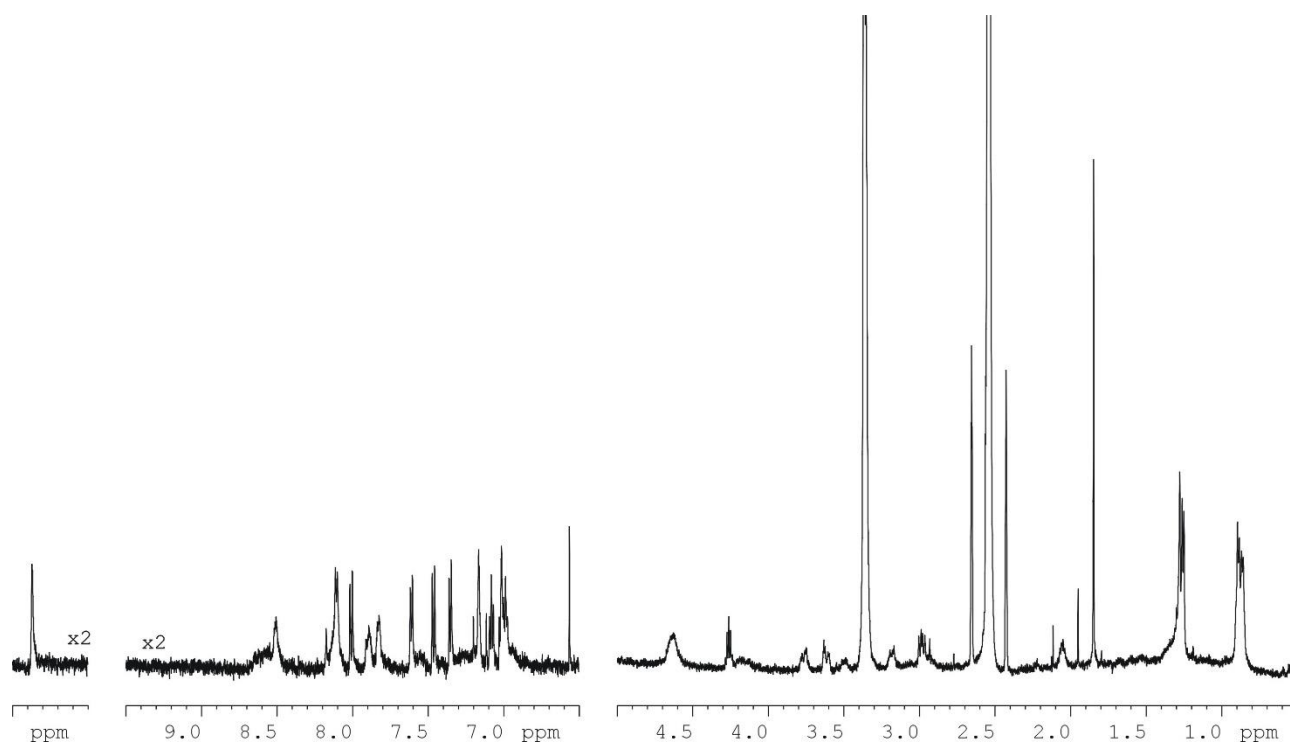

## Compound 3d (X: Br) strategy B AcCys(d)GlyMetValAlaNH<sub>2</sub>

A) Structure of benzofurazan/peptide conjugates

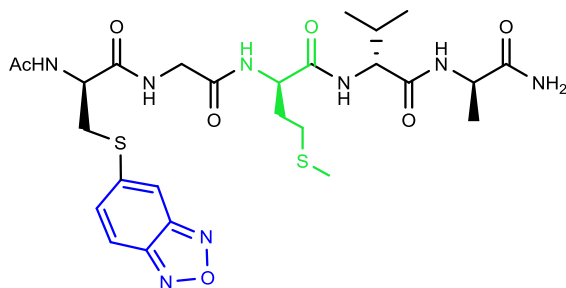

B) preparative HPLC  $t_R$  = 18.577 min; ES-MS: calculated  $[M + H]^+$ , 639.2378, found  $m/z$  639.2380 ( $[M+H]^+$ ). White solid

HPLC profile of the reaction crude product:

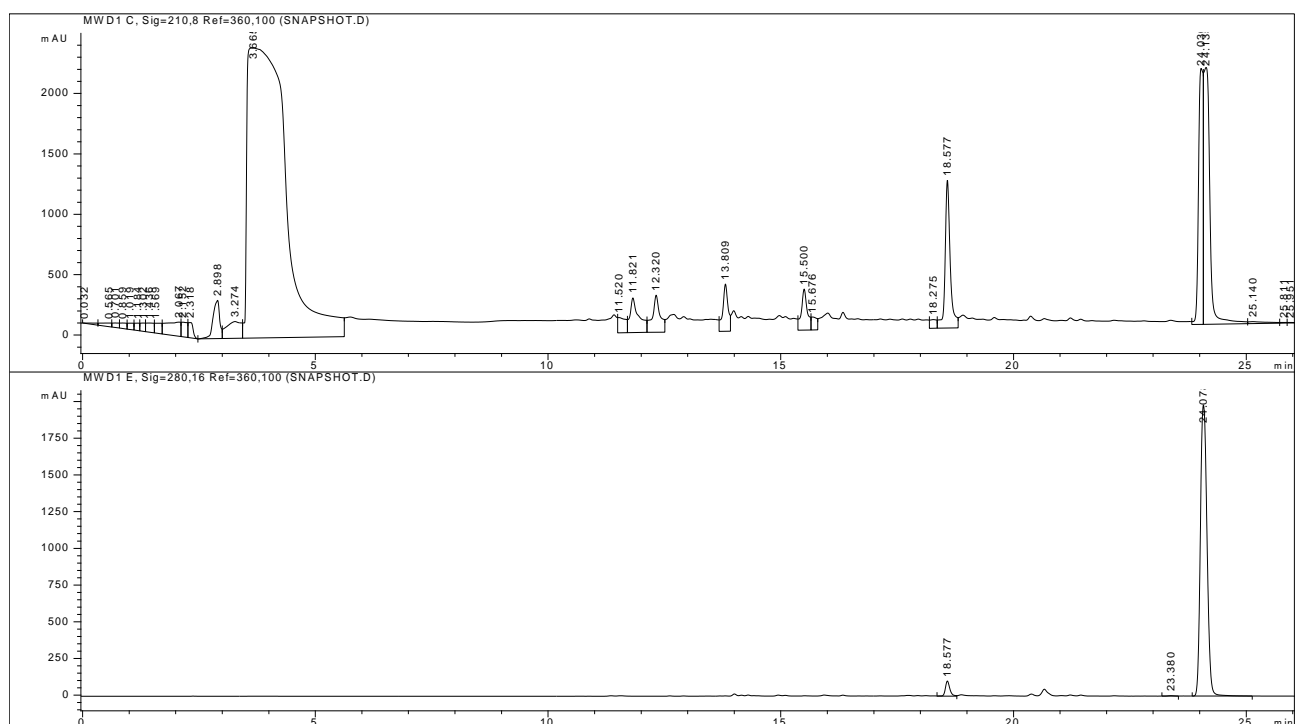

MS spectrum of **3d** after purification:

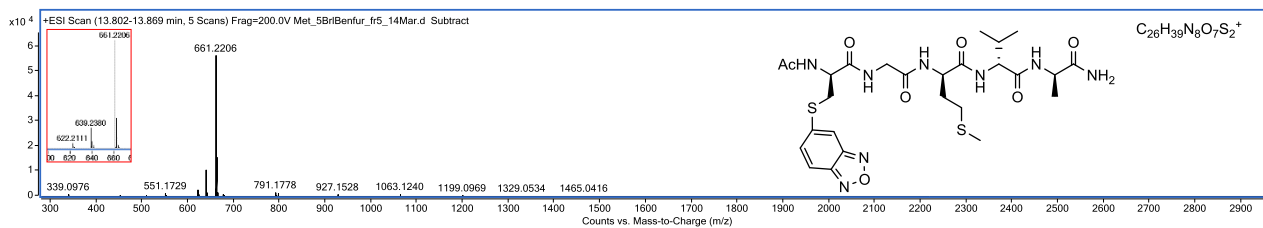

C) <sup>1</sup>H-NMR (600 MHz, dms<sub>o</sub>-d<sub>6</sub>, 298 K)

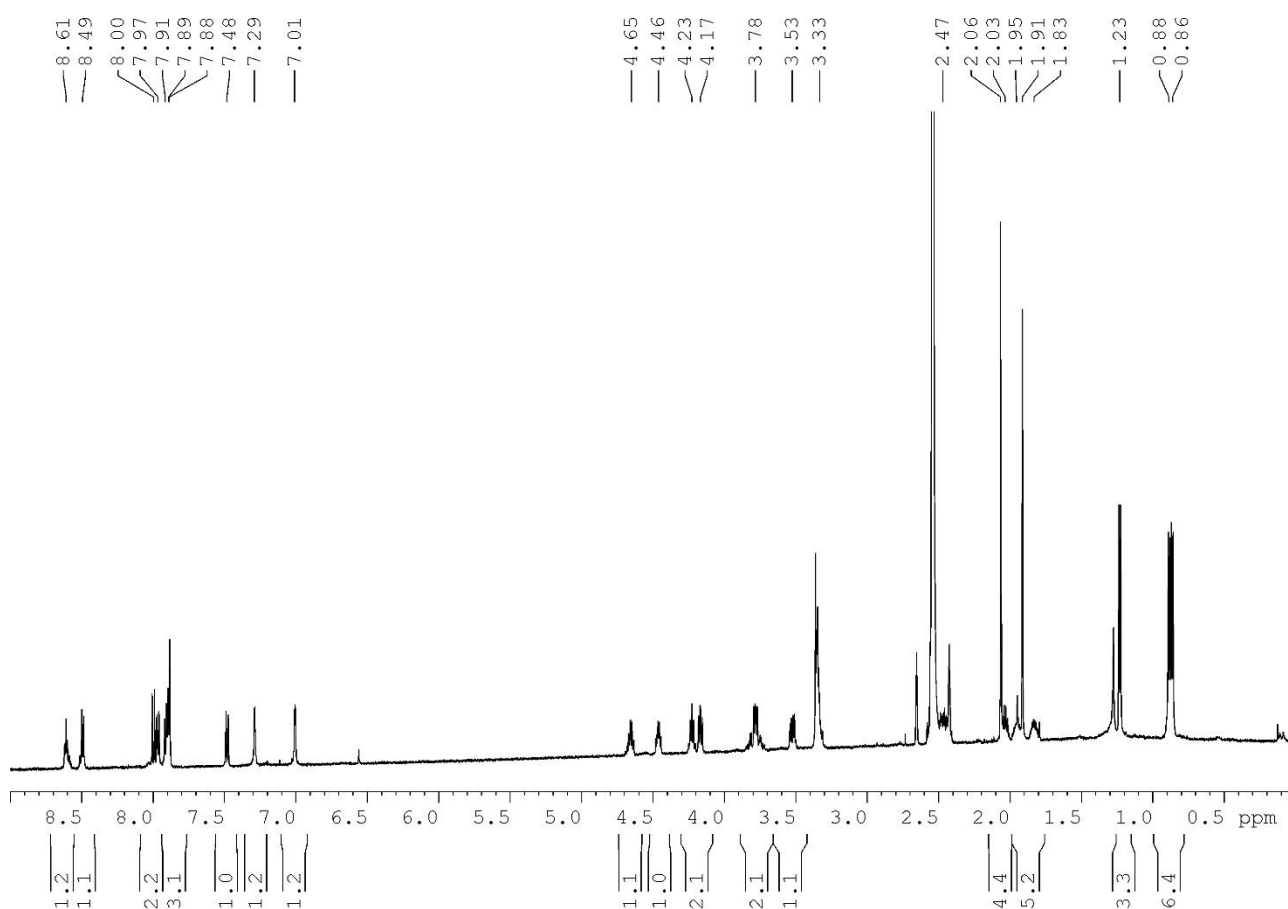

D) Expansions of 2D TOCSY and 2D ROESY NMR (600 MHz, dms<sub>o</sub>-d<sub>6</sub>, 298 K)

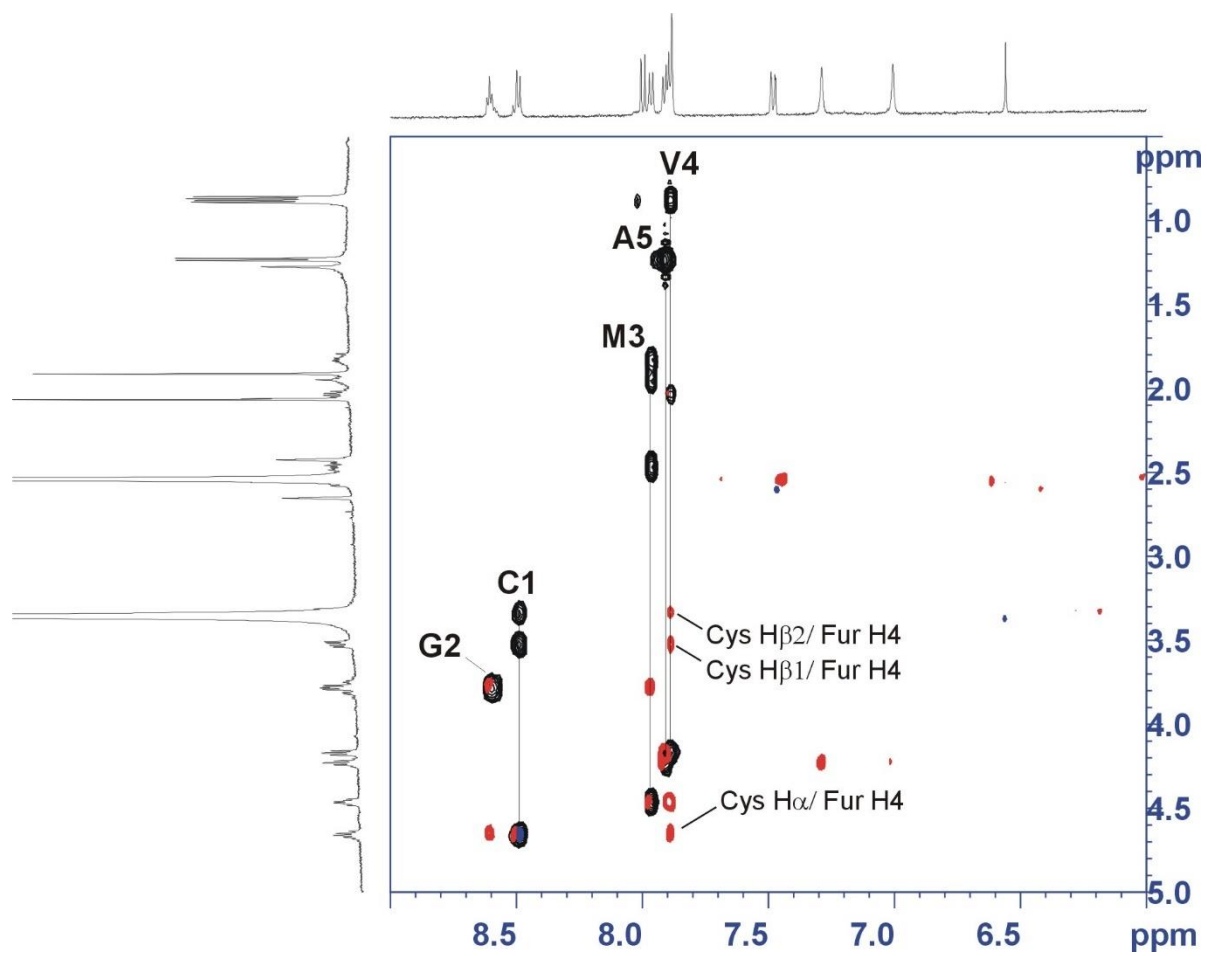

## E) Assignment table

### Compound 3d

| RES       | SPIN ID | SEQ | ppm  |
|-----------|---------|-----|------|
| N-term Ac | CH3     | 1   | 1.91 |
| CYS       | H       | 1   | 8.49 |
| CYS       | HA      | 1   | 4.65 |
| CYS       | HB1     | 1   | 3.53 |
| CYS       | HB2     | 1   | 3.33 |
| FUR       | H6      | 6   | 7.48 |
| FUR       | H7      | 6   | 8.00 |
| FUR       | H4      | 6   | 7.88 |
| GLY       | H       | 2   | 8.61 |
| GLY       | HA2     | 2   | 3.78 |
| GLY       | HA3     | 2   | 3.78 |
| MET       | H       | 3   | 7.97 |
| MET       | HA      | 3   | 4.46 |
| MET       | HB2     | 3   | 1.95 |
| MET       | HB3     | 3   | 1.83 |
| MET       | HG1     | 3   | 2.47 |
| MET       | HG2     | 3   | 2.47 |
| MET       | HD      | 3   | 2.07 |
| VAL       | H       | 4   | 7.89 |
| VAL       | HA      | 4   | 4.17 |
| VAL       | HB      | 4   | 2.03 |
| VAL       | HG1     | 4   | 0.88 |
| VAL       | HG2     | 4   | 0.86 |
| ALA       | H       | 5   | 7.91 |
| ALA       | HA      | 5   | 4.23 |
| ALA       | HB      | 5   | 1.23 |
| CO-NH2    | NH1     | 5   | 7.01 |
| CO-NH2    | NH2     | 5   | 7.29 |

## Compound 4d (X: Br) strategy B AcCys(d)GlyTrpValAlaNH<sub>2</sub>

A) Structure of benzofurazan/peptide conjugates

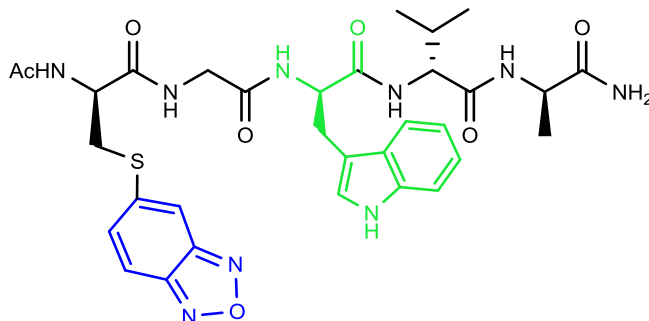

B) preparative HPLC *t*R= 19.847 min; ES-MS: calculated [M + H]<sup>+</sup>, 694.2766, found *m/z* 694.2780 ([M+H]<sup>+</sup>). White solid

HPLC profile of the reaction crude product:

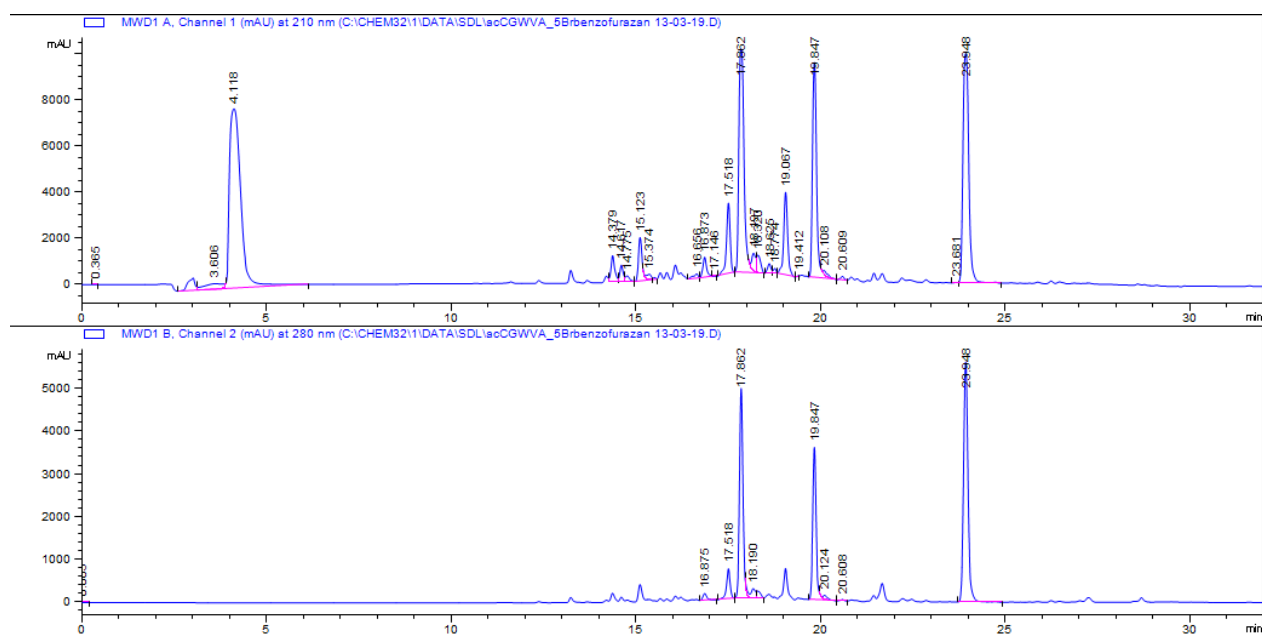



MS spectrum of **4d** after purification:

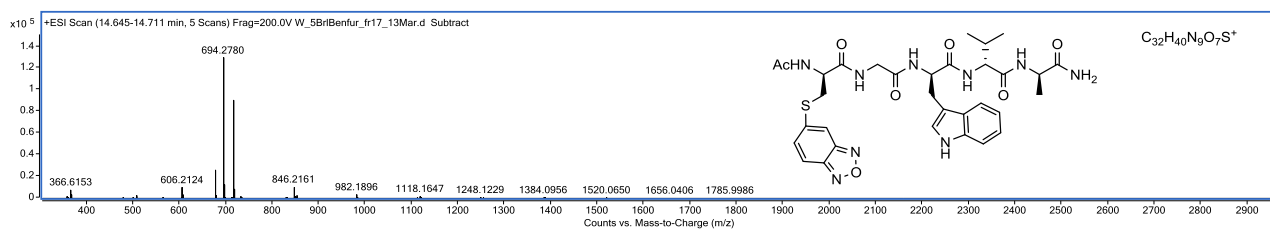

C) <sup>1</sup>H-NMR (600 MHz, dms<sup>o</sup>-d<sub>6</sub>, 298 K)

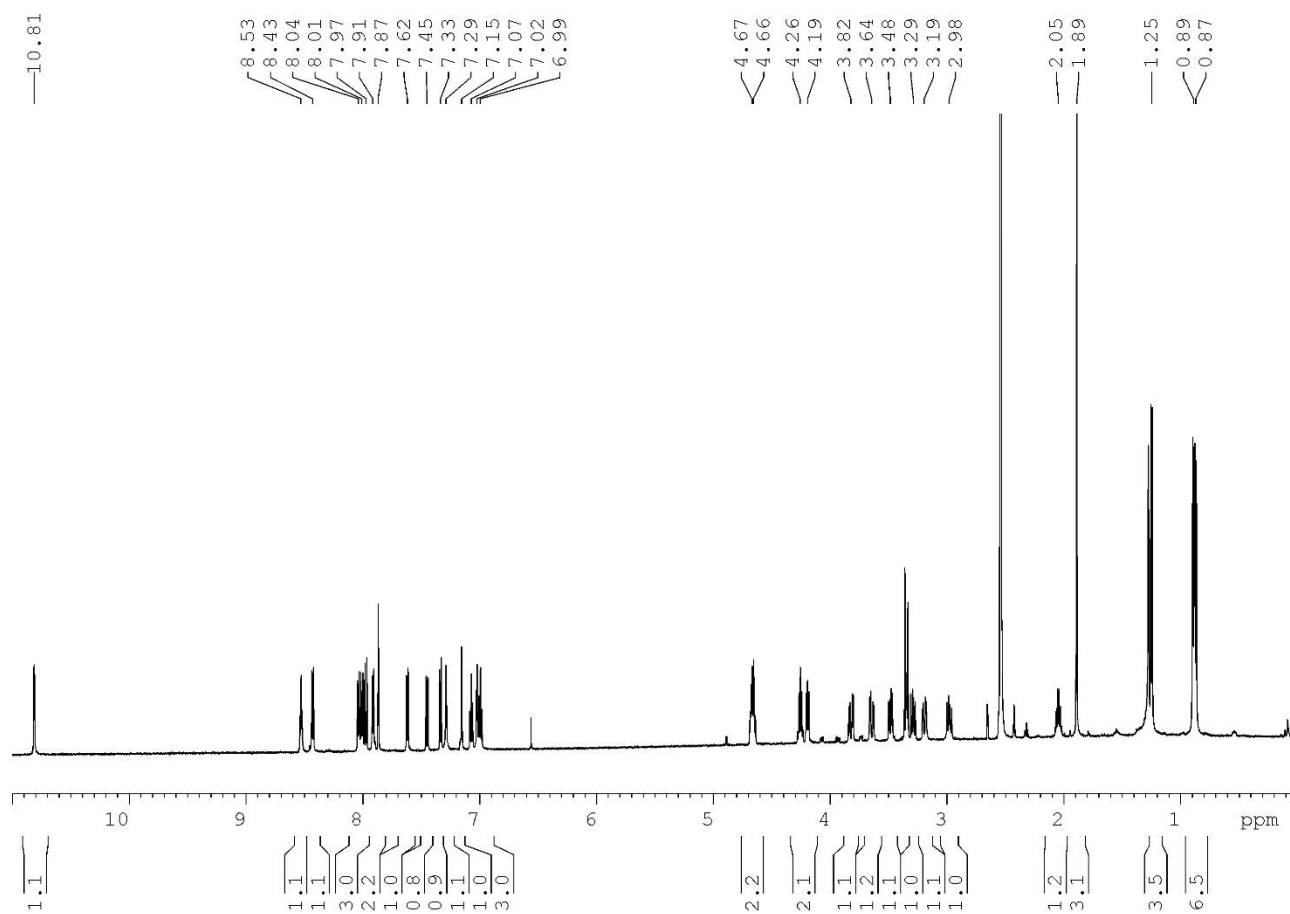

D) Expansions of 2D TOCSY and 2D ROESY NMR (600 MHz, dms<sub>o</sub>-d<sub>6</sub>, 298 K)

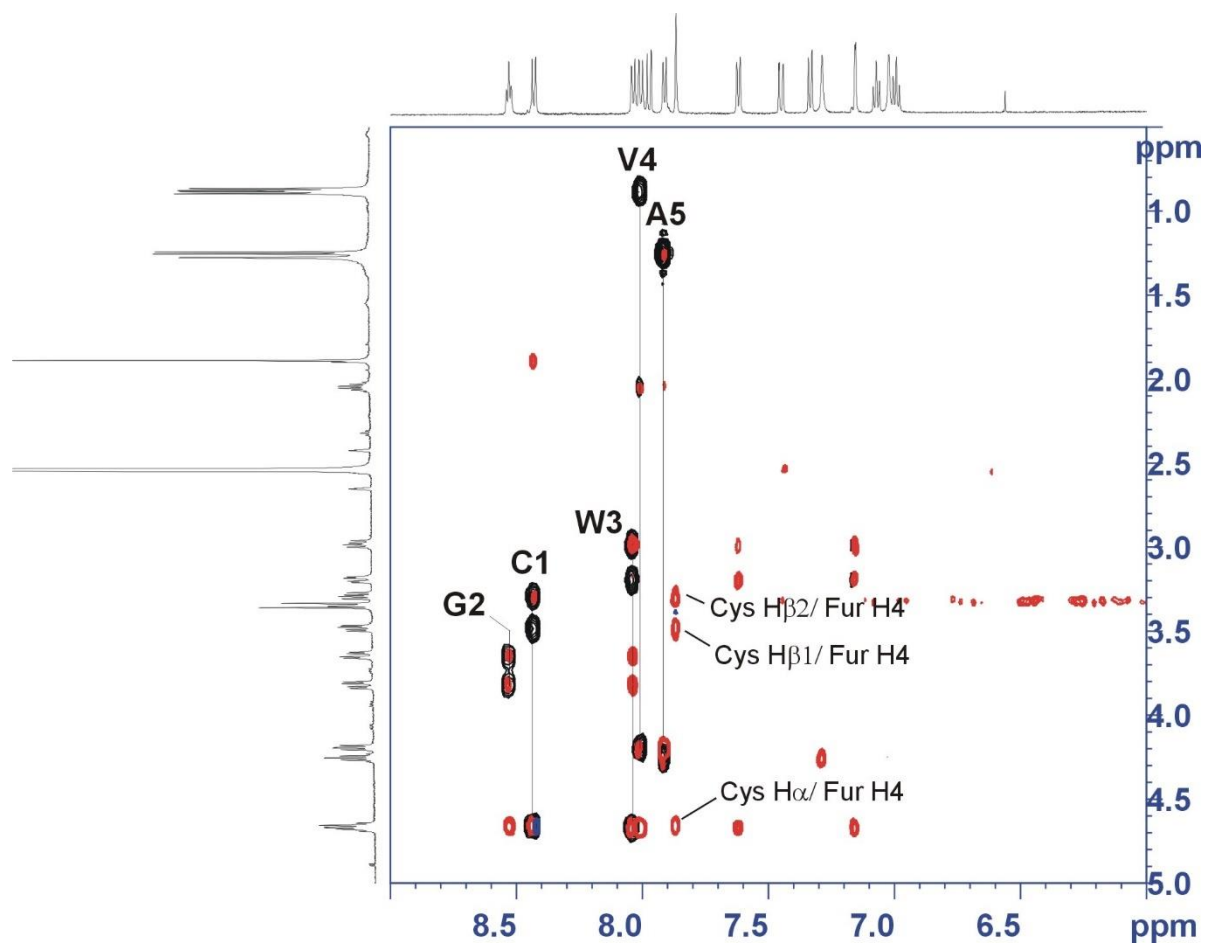

## E) Assignment table

### Compound 4d

| RES       | SPIN ID | SEQ | ppm   |
|-----------|---------|-----|-------|
| N-term Ac | CH3     | 1   | 1.89  |
| CYS       | H       | 1   | 8.43  |
| CYS       | HA      | 1   | 4.66  |
| CYS       | HB1     | 1   | 3.48  |
| CYS       | HB2     | 1   | 3.29  |
| FUR       | H6      | 6   | 7.45  |
| FUR       | H7      | 6   | 7.97  |
| FUR       | H4      | 6   | 7.87  |
| GLY       | H       | 2   | 8.53  |
| GLY       | HA2     | 2   | 3.82  |
| GLY       | HA3     | 2   | 3.64  |
| TRP       | H       | 3   | 8.04  |
| TRP       | HA      | 3   | 4.67  |
| TRP       | HB1     | 3   | 3.19  |
| TRP       | HB2     | 3   | 2.98  |
| TRP       | HD1     | 3   | 7.15  |
| TRP       | HE1     | 3   | 10.81 |
| TRP       | HZ2     | 3   | 7.33  |
| TRP       | HH2     | 3   | 7.07  |
| TRP       | HZ3     | 3   | 6.99  |
| TRP       | HE3     | 3   | 7.62  |
| VAL       | H       | 4   | 8.01  |
| VAL       | HA      | 4   | 4.19  |
| VAL       | HB      | 4   | 2.05  |
| VAL       | HG1     | 4   | 0.89  |
| VAL       | HG2     | 4   | 0.87  |
| ALA       | H       | 5   | 7.91  |
| ALA       | HA      | 5   | 4.26  |
| ALA       | HB      | 5   | 1.25  |
| CO-NH2    | NH1     | 5   | 7.02  |
| CO-NH2    | NH2     | 5   | 7.29  |

G) Overlay of the  $^1\text{H}$ ,  $^{13}\text{C}$  HSQC (black) and  $^1\text{H}$ ,  $^{13}\text{C}$  HMBC (red) NMR spectra (600 MHz, DMSO- $d_6$ , 298 K)

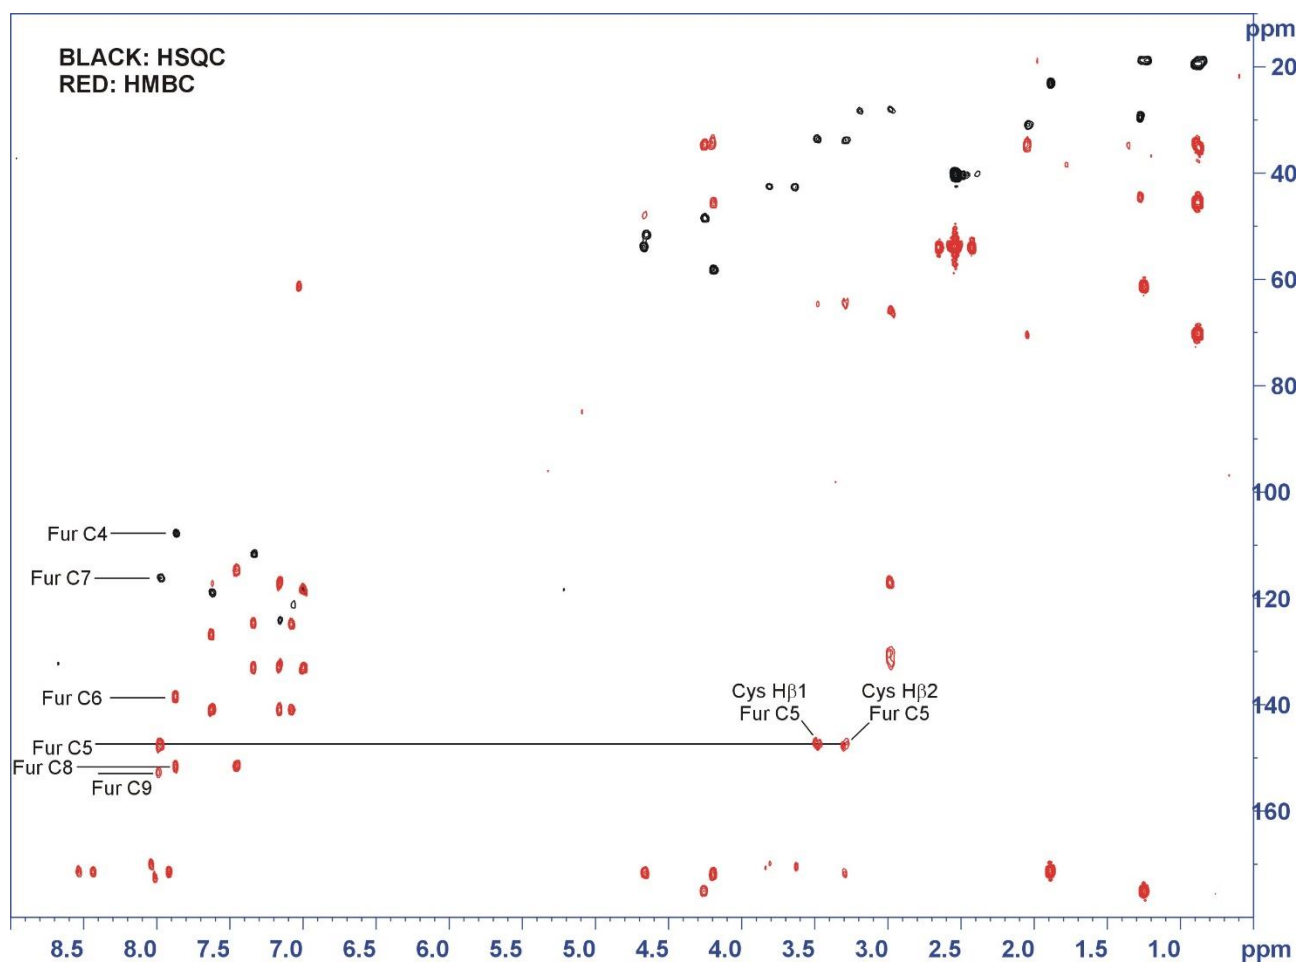

H)  $^{13}\text{C}$  NMR assignment table (from  $^1\text{H}$ ,  $^{13}\text{C}$  HSQC and  $^1\text{H}$ ,  $^{13}\text{C}$  HMBC)

**Compound 4d**

| RES       | SPIN ID  | SEQ | ppm   |
|-----------|----------|-----|-------|
| N-term Ac | CH3      | 1   | 23.2  |
| N-term Ac | C=O      | 1   | 170.5 |
| CYS       | CA       | 1   | 51.8  |
| CYS       | CB       | 1   | 33.7  |
| CYS       | C        | 1   | 171.0 |
| FUR       | C5q      | 6   | 144.1 |
| FUR       | C6       | 6   | 134.2 |
| FUR       | C7       | 6   | 116.3 |
| FUR       | C8q      | 6   | 148.6 |
| FUR       | C9q      | 6   | 149.9 |
| FUR       | C4       | 6   | 107.9 |
| GLY       | CA       | 2   | 42.7  |
| GLY       | C        | 2   | 169.6 |
| TRP       | CA       | 3   | 54.0  |
| TRP       | CB       | 3   | 28.3  |
| TRP       | CG quat  | 3   | 110.3 |
| TRP       | CD1      | 3   | 124.3 |
| TRP       | CD2 quat | 3   | 127.7 |
| TRP       | CE2 quat | 3   | 136.9 |
| TRP       | CZ2      | 3   | 111.8 |
| TRP       | CH2      | 3   | 121.4 |
| TRP       | CZ3      | 3   | 118.7 |
| TRP       | CE3      | 3   | 119.1 |
| TRP       | C        | 3   | 170.8 |
| VAL       | CA       | 4   | 58.4  |
| VAL       | CB       | 4   | 31.1  |
| VAL       | CG1      | 4   | 19.6  |
| VAL       | CG2      | 4   | 18.8  |
| VAL       | C        | 4   | 171.1 |
| ALA       | CA       | 5   | 48.7  |
| ALA       | CB       | 5   | 18.9  |
| ALA       | CO-NH2   | 5   | 174.8 |

## Compound 5d (X: Br) strategy B AcCys(d)GlyThrValAlaNH<sub>2</sub>

### A) Structure of benzofurazan/peptide conjugates

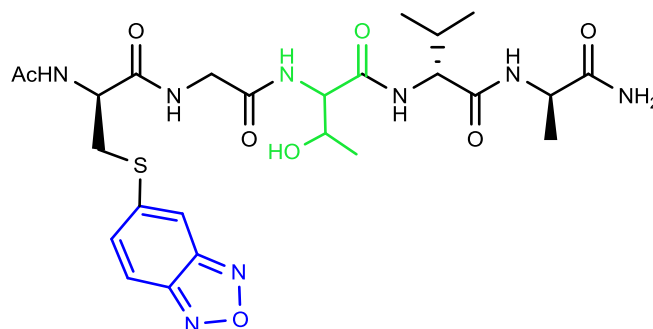

B) preparative HPLC *t*R= 16.782 min; ES-MS: calculated [M + H]<sup>+</sup>, 609.2450, found *m/z* 609.2418 ([M+H]<sup>+</sup>). White solid

HPLC profile of the reaction crude product:

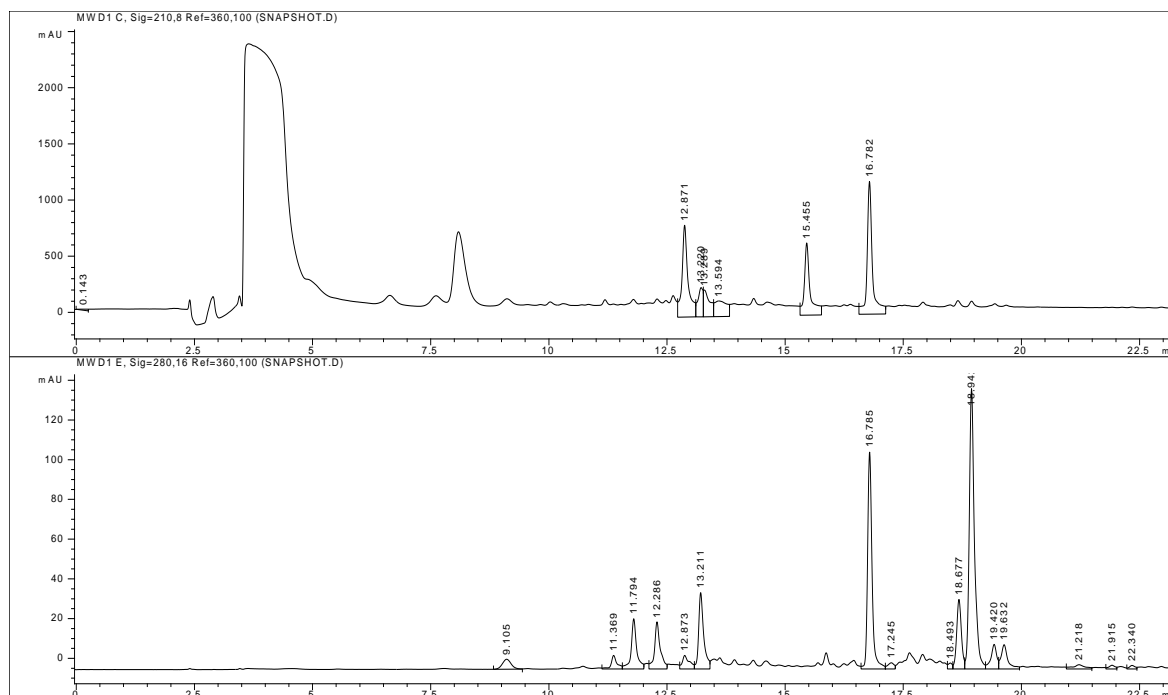

MS spectrum of **5d** after purification:

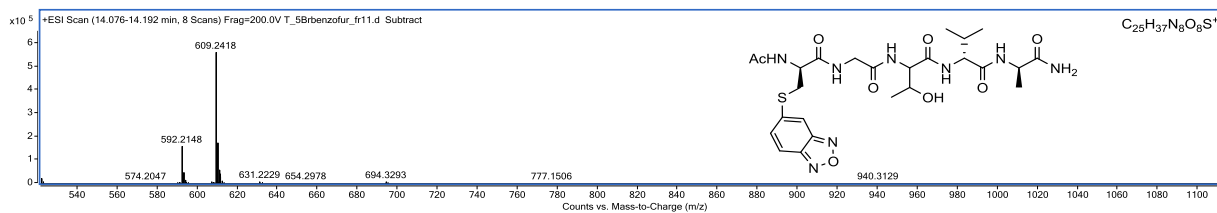

C)  $^1H$ -NMR (600 MHz,  $dms\text{-}d_6$ , 298 K)

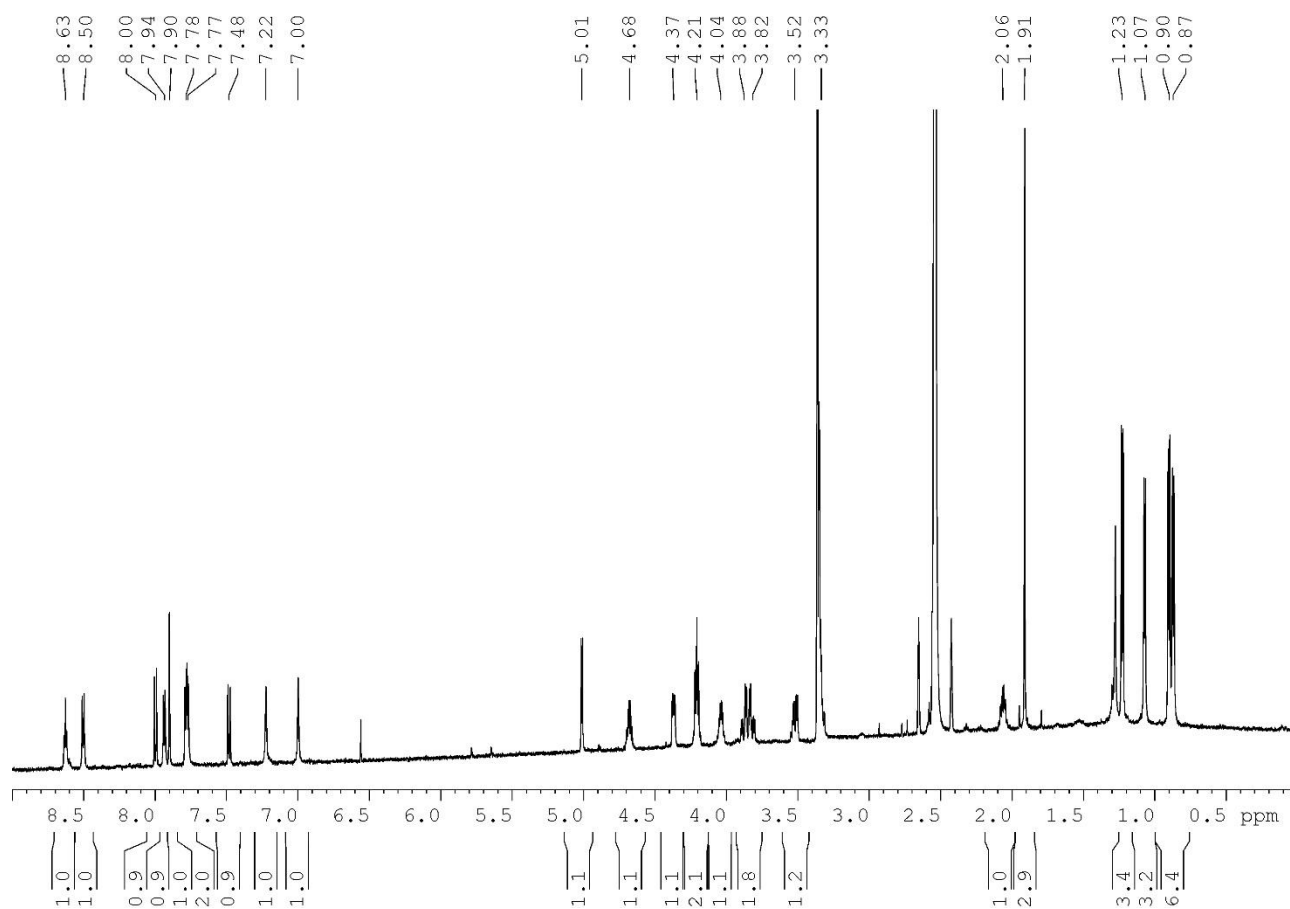

D) Expansions of 2D TOCSY and 2D ROESY NMR (600 MHz, dms<sub>o</sub>-d<sub>6</sub>, 298 K)

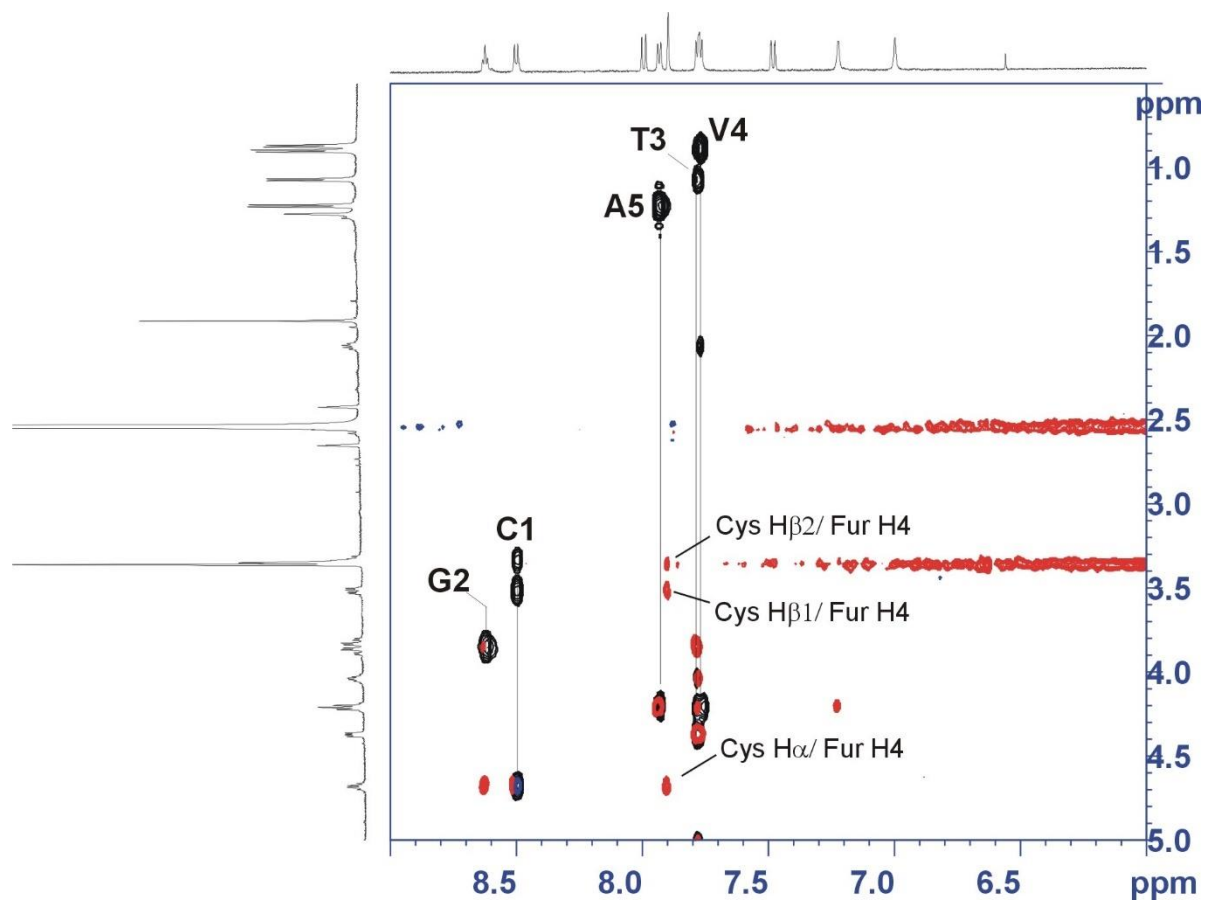



## E) Assignment table

### Compound 5d

| RES       | SPIN ID | SEQ | ppm  |
|-----------|---------|-----|------|
| N-term Ac | CH3     | 1   | 1.91 |
| CYS       | H       | 1   | 8.50 |
| CYS       | HA      | 1   | 4.68 |
| CYS       | HB1     | 1   | 3.52 |
| CYS       | HB2     | 1   | 3.33 |
| FUR       | H6      | 6   | 7.48 |
| FUR       | H7      | 6   | 8.00 |
| FUR       | H4      | 6   | 7.90 |
| GLY       | H       | 2   | 8.63 |
| GLY       | HA2     | 2   | 3.88 |
| GLY       | HA3     | 2   | 3.82 |
| THR       | H       | 3   | 7.78 |
| TRP       | HA      | 3   | 4.37 |
| THR       | HB      | 3   | 4.04 |
| THR       | HG1     | 3   | 5.01 |
| THR       | HG2     | 3   | 1.07 |
| VAL       | H       | 4   | 7.77 |
| VAL       | HA      | 4   | 4.21 |
| VAL       | HB      | 4   | 2.06 |
| VAL       | HG1     | 4   | 0.90 |
| VAL       | HG2     | 4   | 0.87 |
| ALA       | H       | 5   | 7.94 |
| ALA       | HA      | 5   | 4.21 |
| ALA       | HB      | 5   | 1.23 |
| CO-NH2    | NH1     | 5   | 7.00 |
| CO-NH2    | NH2     | 5   | 7.22 |

## Compound 6d (X: Br) strategy B

AcCys(d)GlyHisValAlaNH<sub>2</sub>

A) Structure of benzofurazan/peptide conjugates

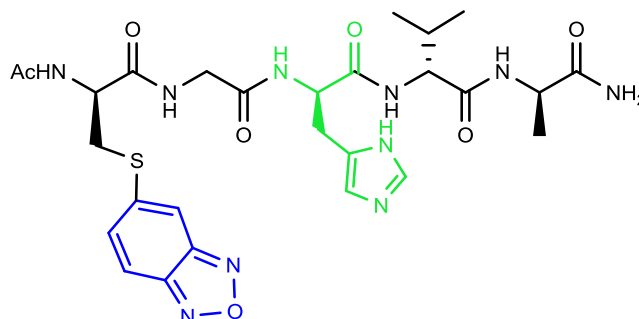

B) preparative HPLC  $t_R = 29.905$  min; ES-MS: calculated  $[M + H]^+$ , 645.2562, found  $m/z$  645.2568 ( $[M+H]^+$ ). White solid

HPLC profile of the reaction crude product:

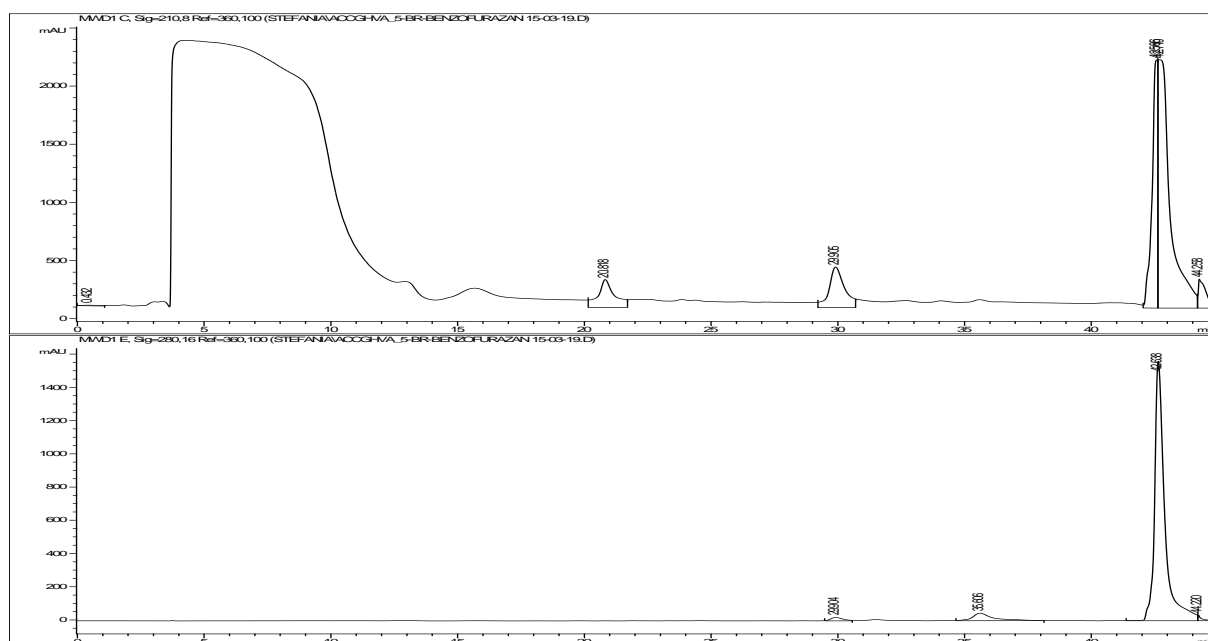

## MS spectrum of **6d** after purification:

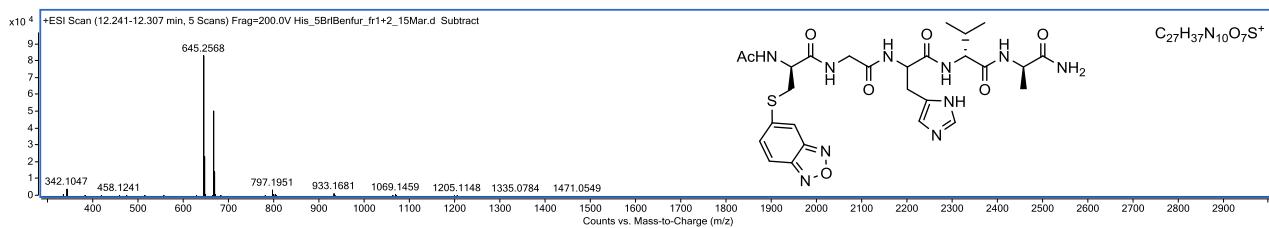

## C) <sup>1</sup>H-NMR (600 MHz, dmsO-d<sub>6</sub>, 298 K)

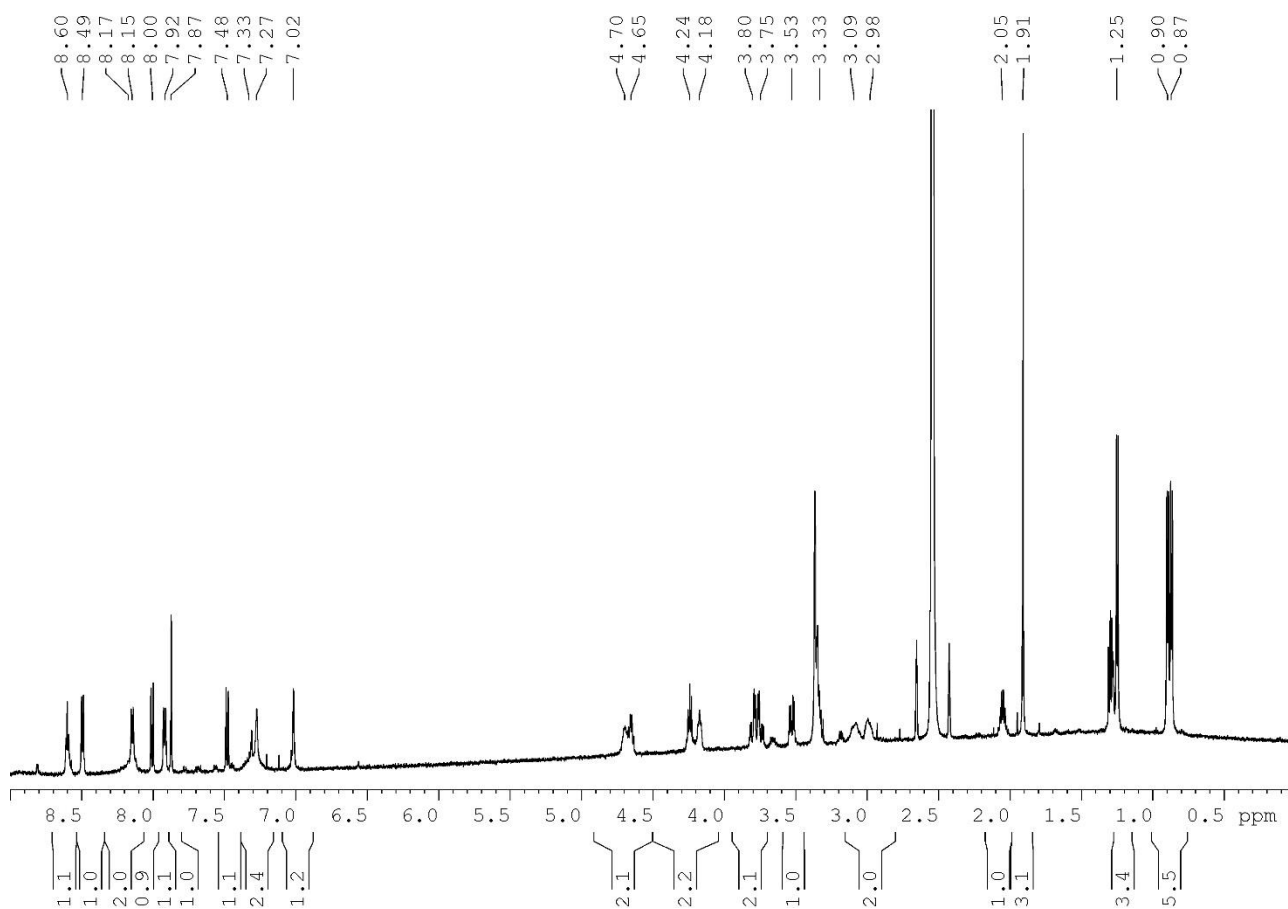

D) Expansions of 2D TOCSY and 2D ROESY NMR (600 MHz, dms<sub>o</sub>-d<sub>6</sub>, 298 K)

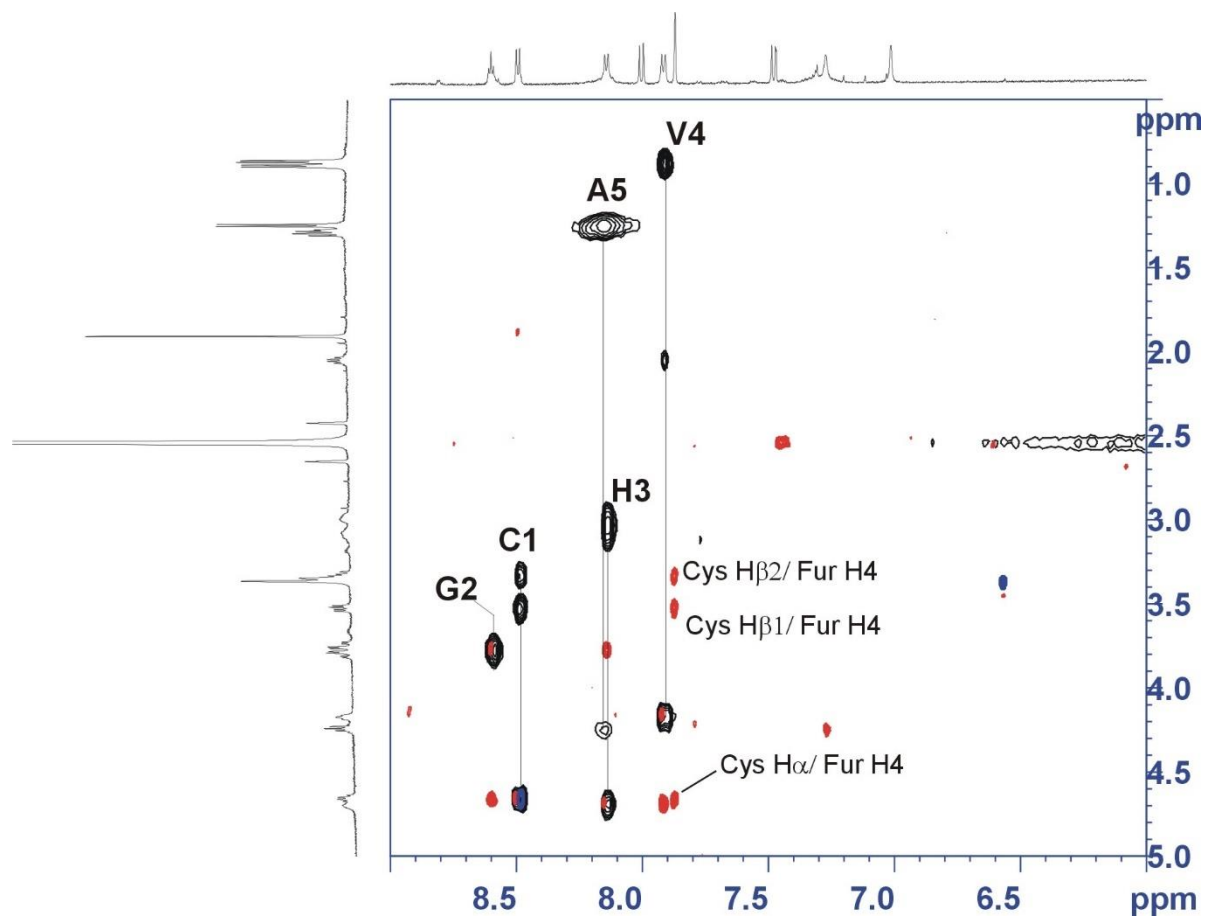

## E) Assignment table

### Compound 6d

| RES       | SPIN ID | SEQ | ppm  |
|-----------|---------|-----|------|
| N-term Ac | CH3     | 1   | 1.91 |
| CYS       | H       | 1   | 8.49 |
| CYS       | HA      | 1   | 4.65 |
| CYS       | HB1     | 1   | 3.53 |
| CYS       | HB2     | 1   | 3.33 |
| FUR       | H6      | 6   | 7.48 |
| FUR       | H7      | 6   | 8.00 |
| FUR       | H4      | 6   | 7.87 |
| GLY       | H       | 2   | 8.60 |
| GLY       | HA2     | 2   | 3.80 |
| GLY       | HA3     | 2   | 3.75 |
| HIS       | H       | 3   | 8.15 |
| HIS       | HA      | 3   | 4.70 |
| HIS       | HB1     | 3   | 3.09 |
| HIS       | HB2     | 3   | 2.98 |
| HIS       | HD2     | 3   | 7.33 |
| HIS       | HE1     | 3   | 8.94 |
| VAL       | H       | 4   | 7.92 |
| VAL       | HA      | 4   | 4.17 |
| VAL       | HB      | 4   | 2.05 |
| VAL       | HG1     | 4   | 0.90 |
| VAL       | HG2     | 4   | 0.87 |
| ALA       | H       | 5   | 8.17 |
| ALA       | HA      | 5   | 4.24 |
| ALA       | HB      | 5   | 1.25 |
| CO-NH2    | NH1     | 5   | 7.02 |
| CO-NH2    | NH2     | 5   | 7.27 |

## Compound 7d (X: Br) strategy B AcCys(d)GlyLysValAlaNH<sub>2</sub>

### A) Structure of benzofurazan/peptide conjugates

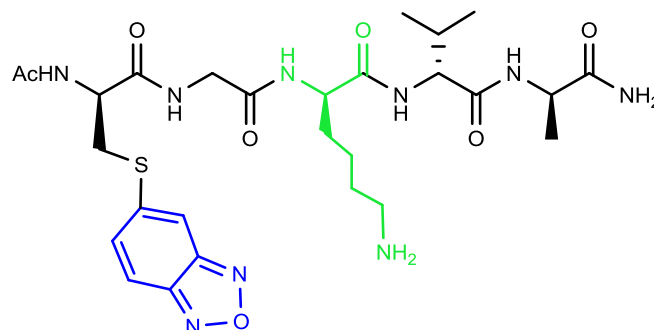

B) preparative HPLC *t*R= 15.055 min; ES-MS: calculated [M + H]<sup>+</sup>, 636.2943, found *m/z* 636.2976 ([M+H]<sup>+</sup>). White solid

HPLC profile of the reaction crude product:

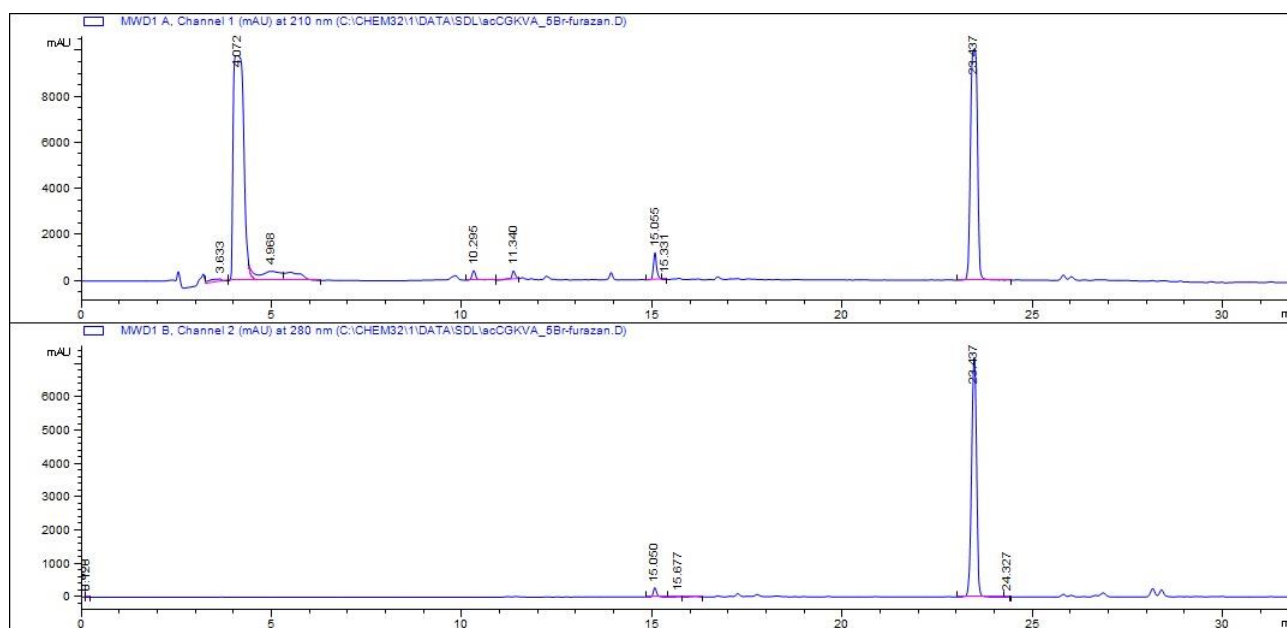

MS spectrum of **7d** after purification:

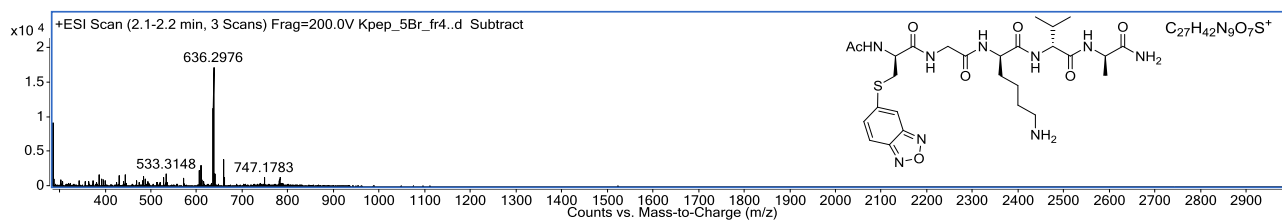

C)  $^1H$ -NMR (600 MHz,  $dms\text{-}d_6$ , 298 K)

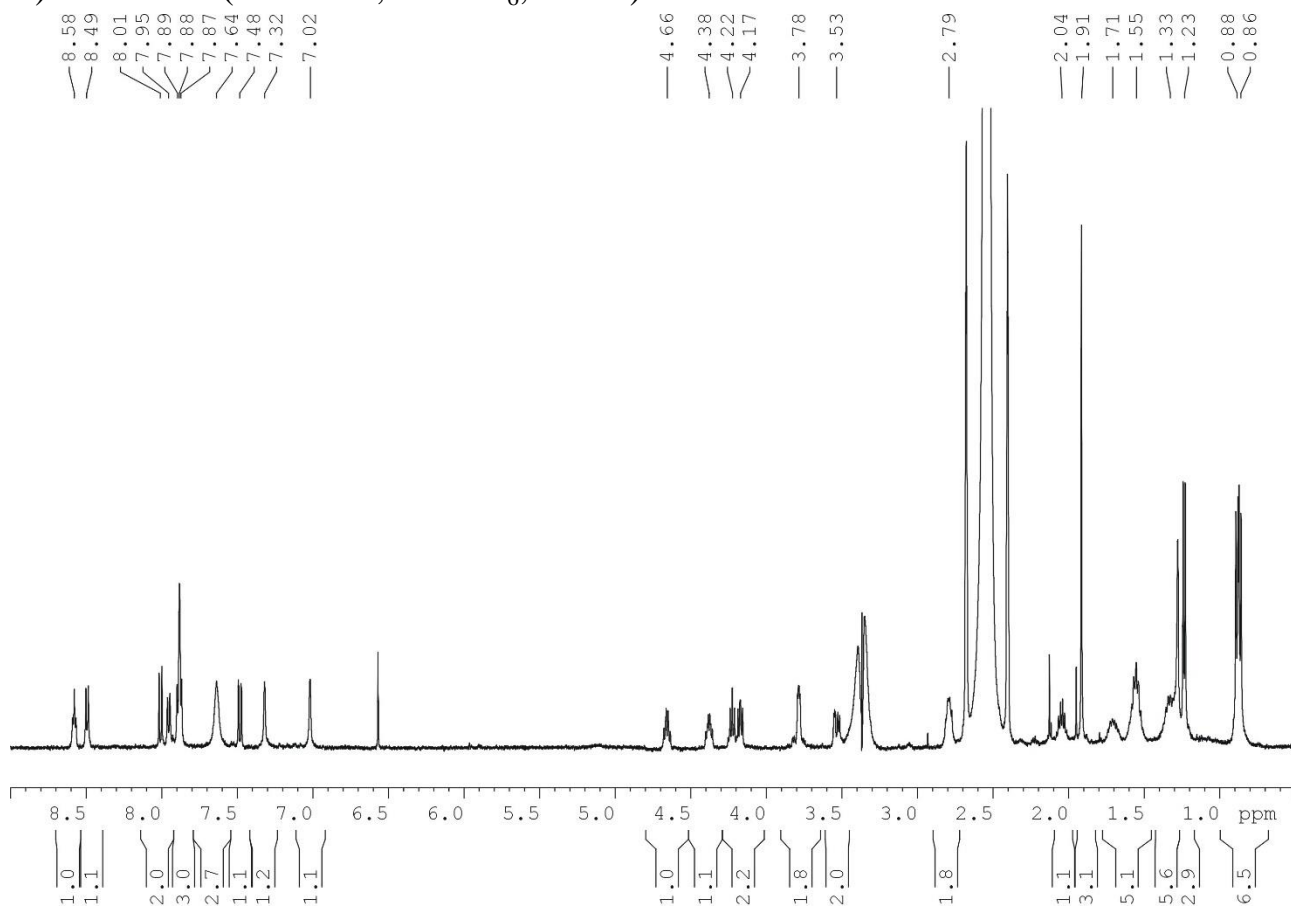

D) Expansions of 2D TOCSY and 2D ROESY NMR (600 MHz, dms<sub>o</sub>-d<sub>6</sub>, 298 K)

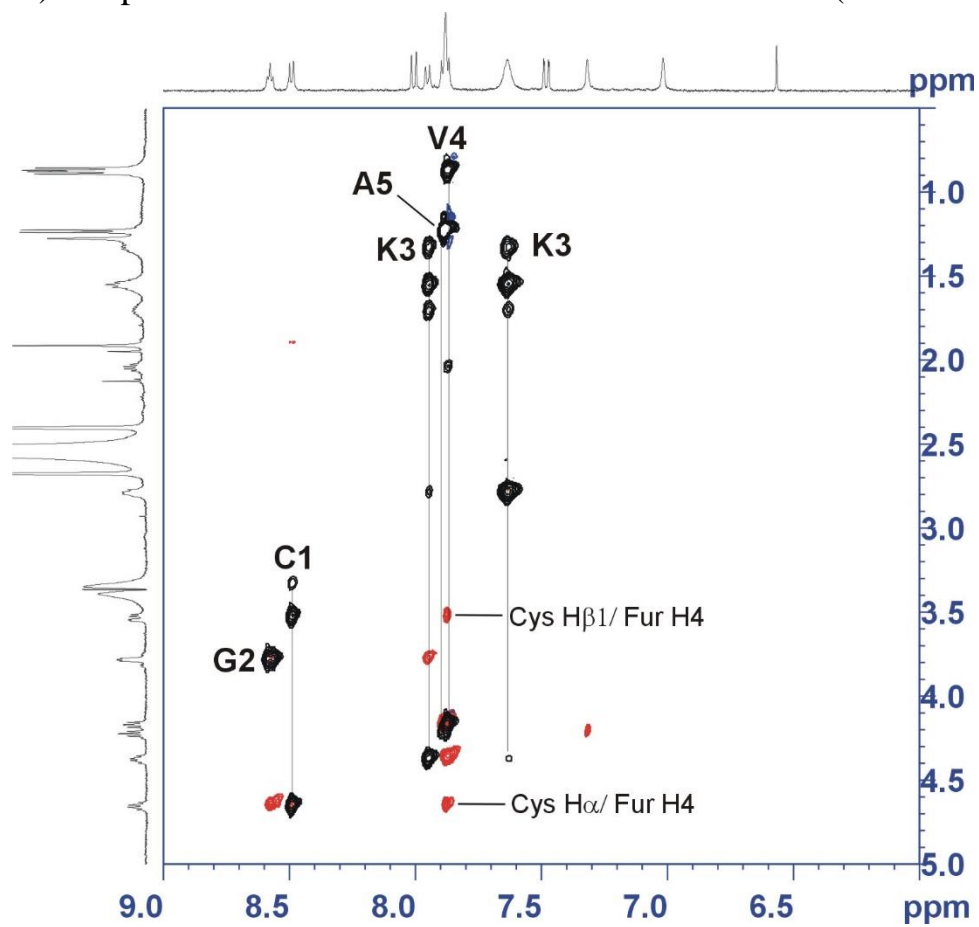



## E) Assignment table

### Compound 7d

| RES       | SPIN ID  | SEQ | ppm                |
|-----------|----------|-----|--------------------|
| N-term Ac | CH3      | 1   | 1,91               |
| CYS       | H        | 1   | 8,49               |
| CYS       | HA       | 1   | 4,66               |
| CYS       | HB1      | 1   | 3,5                |
| CYS       | HB2      | 1   | 3,32               |
| FUR       | H6       | 6   | 7,48               |
| FUR       | H7       | 6   | 8,01               |
| FUR       | H4       | 6   | 7,88               |
| GLY       | H        | 2   | 8,58               |
| GLY       | HA2      | 2   | 3,78               |
| GLY       | HA3      | 2   | 3,78               |
| LYS       | H        | 3   | 7,95               |
| LYS       | HA       | 3   | 4,38               |
| LYS       | HB/HG/HD | 3   | 1,71 – 1,55 – 1,33 |
| LYS       | HE       | 3   | 2,79               |
| LYS       | HZ       | 3   | 7,64               |
| VAL       | H        | 4   | 7,87               |
| VAL       | HA       | 4   | 4,17               |
| VAL       | HB       | 4   | 2,04               |
| VAL       | HG1      | 4   | 0,88               |
| VAL       | HG2      | 4   | 0,86               |
| ALA       | H        | 5   | 7,89               |
| ALA       | HA       | 5   | 4,22               |
| ALA       | HB       | 5   | 1,23               |
| CO-NH2    | NH1      | 5   | 7,02               |
| CO-NH2    | NH2      | 5   | 7,32               |

## Compound 7b (X: Cl) strategy B

AcCys(b)GlyLysValAlaNH<sub>2</sub>

### A) Structure of benzofurazan/peptide conjugates

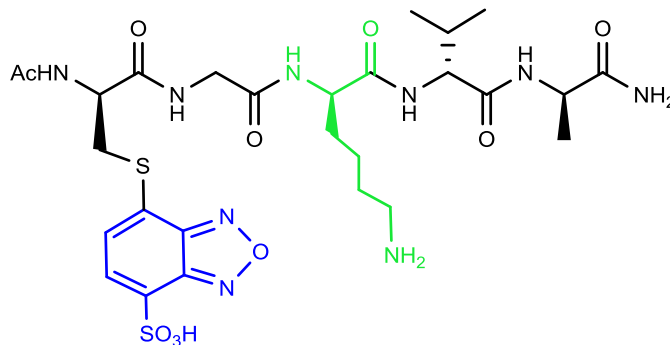

B) preparative HPLC *t*R= 12.248 min (co-eluted with the substrate employed b-Cl);  
ES-MS: calculated [M + H]<sup>+</sup>, 716.2503, found *m/z* 716.2564 ([M+H]<sup>+</sup>). yellow solid

### HPLC profile of the reaction crude product:

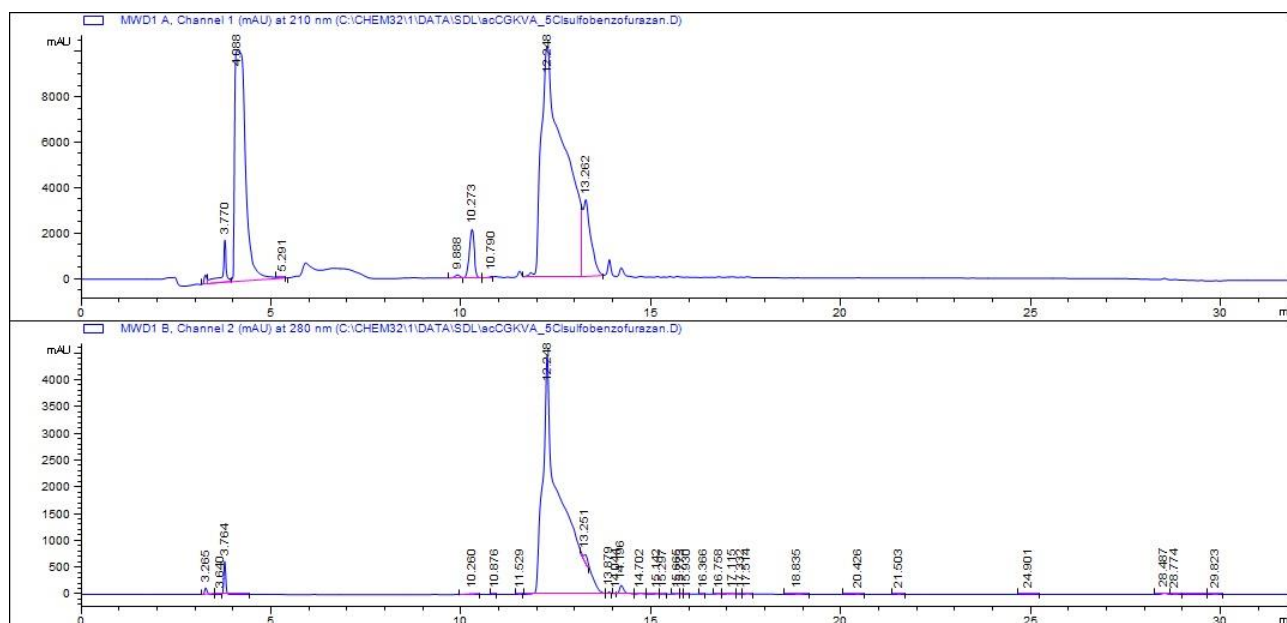

MS spectrum of **7b** after purification:

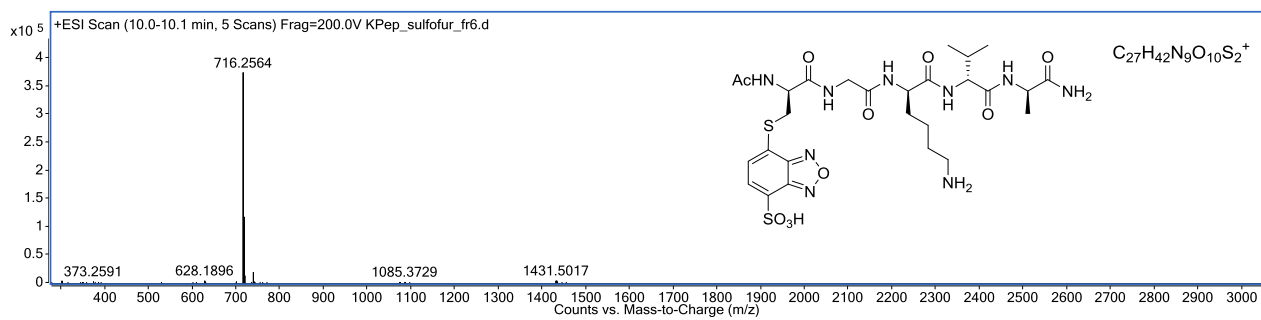

F) Fluorescence spectrum ( $\lambda_{ex} = 380$  nm)

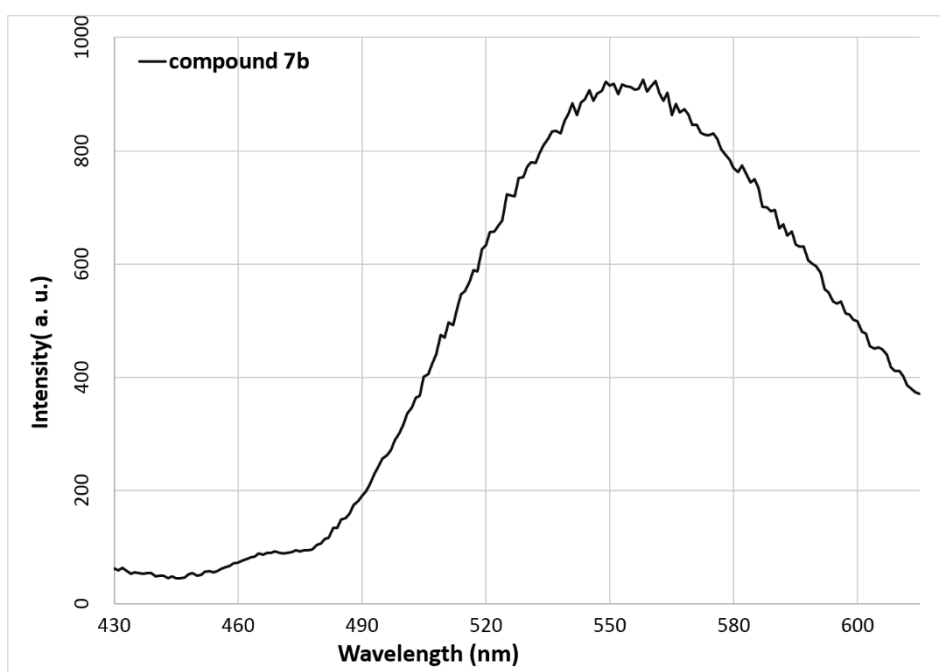

## Abbreviations

Boc: *tert*-butoxycarbonyl

DBU: 1,8-diazabicyclo[5.4.0]undec-7-ene

DCM: Dichloromethane

DIPEA: diisopropylethylamine

DMF: *N,N*-Dimethylformamide

DMSO-*d*<sub>6</sub>: Dimethylsulfoxide-*d*<sub>6</sub>

Fmoc: 9-Fluorenylmethoxycarbonyl

Fur: Benzofurazan

HOBt: *N*-hydroxybenzotriazole

PyBOP: benzotriazol-1-yl-oxy-tris-pyrrolidino-phosphonium

<sup>t</sup>Bu: *tert*-butyl

TFA: Trifluoroacetic acid

TEA: Triethylamine

TIS: Triisopropylsilane
